# Supplementary material for: The impact of sanctuary visits on children’s knowledge and attitudes toward primate welfare and conservation
Source: PubMed Central journal article supplement (PMC10284066; doi:10.7717/peerj.15074), 2023-06-16
Supplement: peerj-11-15074-s004.pdf [file peerj-11-15074-s004.pdf]

Supplementary Material.

| <b>V.I</b> | <b>F</b> | <b>df</b> | <b>P value</b> |
|------------|----------|-----------|----------------|
| EEA        | 788.520  | 1         | <b>0.00**</b>  |
| Grade      | 11.72    | 2         | <b>0.00**</b>  |
| Sex        | 0.7721   | 1         | 0.533          |

Supplementary Table. 1. Results of the linear model for general impact of Knowledge. *F* corresponds to the F-statistic. *df* to the degrees freedom. *P* to the P Value where \* is a significance of < 0.5, \*\* is a significance of < 0.01.

| <b>V..I</b>    | <b>F</b> | <b>df</b> | <b>P value</b> |
|----------------|----------|-----------|----------------|
| Category       | 135.520  | 1         | <b>0.00**</b>  |
| Sex            | 4.45     | 1         | <b>0.01*</b>   |
| Sex x Category | 11.007   | 1         | <b>0.01*</b>   |

Supplementary Table 2. Results of the linear mixed model for general impact of Knowledge for Category.. *F* corresponds to the F-statistic. *df* to the degrees freedom. *P* to the P Value where \* is a significance of < 0.5, \*\* is a significance of < 0.01.

| <b>V..I</b> | <b>F</b> | <b>df</b> | <b>P value</b> |
|-------------|----------|-----------|----------------|
| EEA         | 347.283  | 1         | <b>0.00**</b>  |
| Grade       | 0.239    | 2         | 0.787          |
| Sex         | 34.249   | 1         | <b>0.00**</b>  |

Supplementary Table 3. Results of the linear model for general impact of attitudes. *F* corresponds to the F-statistic. *df* to the degrees freedom. *P* to the P Value where \* is a significance of < 0.5, \*\* is a significance of < 0.01.
