# Supplementary material for: The impact of sanctuary visits on children’s knowledge and attitudes toward primate welfare and conservation
Source: PubMed Central journal article supplement (PMC10284066; doi:10.7717/peerj.15074), 2023-06-16
Supplement: peerj-11-15074-s005.pdf [file peerj-11-15074-s005.pdf]

# ESCOLA CONEIXEMENT PRE

L'any 2004 la Fundació MONA va iniciar el seu programa educatiu. Des de llavors ens han visitat moltes persones que han après aspectes nous dels primats i han conegut la seva realitat. Ara volem recollir aquestes dades de manera més formal per tal de valorar el programa educatiu amb el qual treballem.

Agrairíem contestar les preguntes d'aquest qüestionari. Ens ajudarà molt a seguir millorant.

Gràcies per la teva col·laboració.

## 1. Data

---

*Exemple: 7 de gener de 2019*

## 2. Edat

## 3. Curs

*Marqueu només un oval.*

3er

4rt

5è

6è

1er o 2on ESSO

3er o 4rt ESSO

Batxillerat

## 4. Marca el que correspongui

*Marqueu només un oval.*

Nen

Nena

## 5. Si poguessis tenir un ximpanzé a casa des de petit creus que podria ser una bona mascota.

*Marqueu només un oval.*

Si, totalment d' acord

Depen del caràcter del ximpanzé

No. Mai

## 6. El ximpanzé és un animal:

*Marqueu només un oval.*

solitari / viu sol

social /viu en grup

## 7. Creus que els ximpanzés son bons per fer anuncis a la tele?

*Marqueu només un oval.*

Si

No

## 8. Entrenar animals com ximpanzés perquè surtin en pel·lícules o anuncis els perjudica?

*Marqueu només un oval.*

Si

No, Si els tracten bé.

## 9. Els ximpanzés

*Marqueu només un oval.*

- Són animals que estan en perill d' extinció
- Són una espècie vulnerable
- No estan en perill. Encara n' hi han molts

## 10. Quants anys pot viure un ximpanzé en captivitat?

*Marqueu només un oval.*

- 10-15 anys
- 20-30 anys
- 50-60 anys
- 90-100 anys

## 11. Quant pot arribar a pesar un ximpanzé mascle adult?

*Marqueu només un oval.*

- 20-30 kg
- 50-60 kg
- 70-80 kg
- Més de 90Kg

## 12. Un centre de recuperació de primats com la Fundació MONA es dedica a:

*Marqueu només un oval.*

- Recuperar i socialitzar primats que provenen de ser mascotes o d' actuar en circs i televisió
- Cuidar primats fins que estiguin bé i després tornar-los a la selva
- Guarir primats que han estat ferits a la selva
- Totes les anteriors són correctes

Google no ha creat ni aprovat aquest contingut.

## Google Formularis
