# Supplementary material for: The impact of sanctuary visits on children’s knowledge and attitudes toward primate welfare and conservation
Source: PubMed Central journal article supplement (PMC10284066; doi:10.7717/peerj.15074), 2023-06-16
Supplement: peerj-11-15074-s006.pdf [file peerj-11-15074-s006.pdf]

# ESCOLA ACTITUD PRE

L'objectiu d'aquest formulari és fer una valoració de les activitats del programa educatiu de la Fundació MONA i comprovar si compleixen l'objectiu pel qual es van crear.

Agrairíem contestéssiu totes les preguntes.

Aquestes preguntes van associades a les imatges que us lliurem.

Gràcies per la teva col.laboració.

## 1. Data

---

*Exemple: 7 de gener de 2019*

## 2. Edat

---

## 3. Curs

*Marqueu només un oval.*

- 3er
- 4rt
- 5è
- 6è
- 1er o 2on ESSO
- 3er o 4rt ESSO
- BATXILLERAT

## 4. Marca el que correspongui

*Marqueu només un oval.*

- Nen
- Nena

5. 1. A quin grup creus que pertanyen els ximpanzés?

*Marqueu només un oval.*

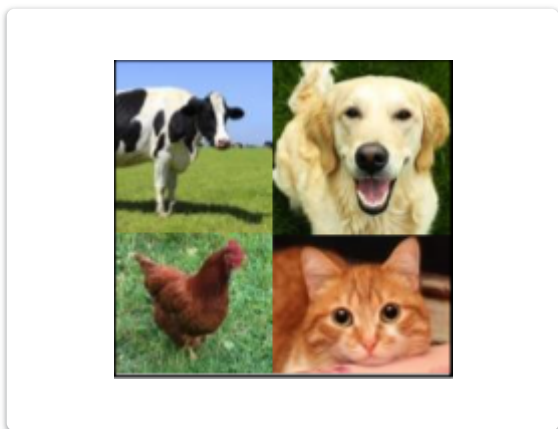

b)

6. 2. Quina d'aquestes fotos prefereixes veure en un anunci de Fundació Mona?

*Marqueu només un oval.*

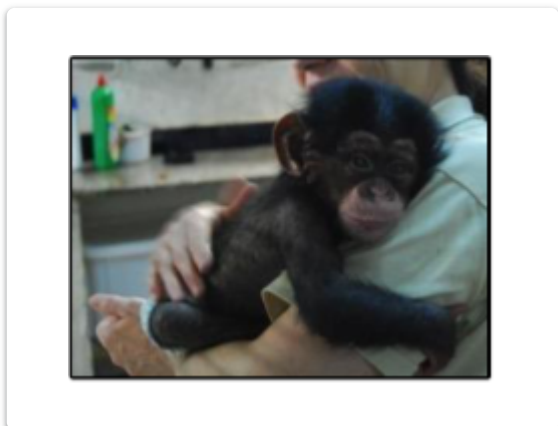

a)

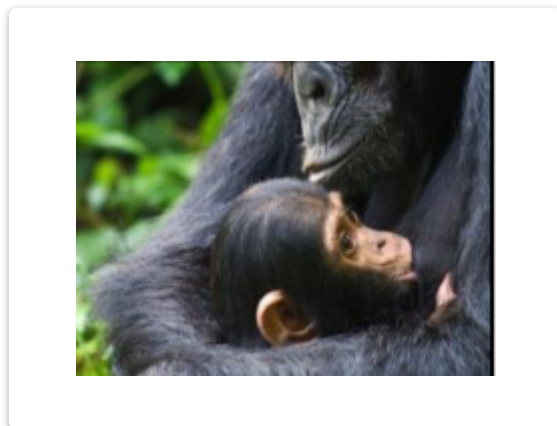

b)

7. 3. A quin grup creus que pertanyen els ximpanzés?

*Marqueu només un oval.*

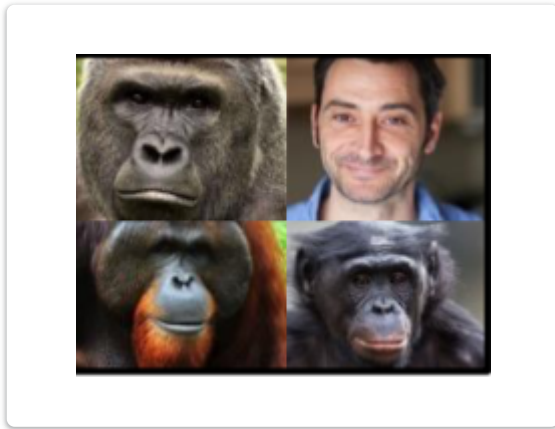

a)

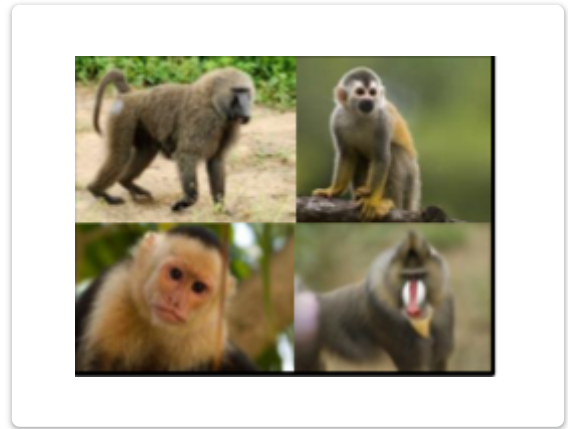

b)

8. 4. Com t' agradaria més veure el bosc?

*Marqueu només un oval.*

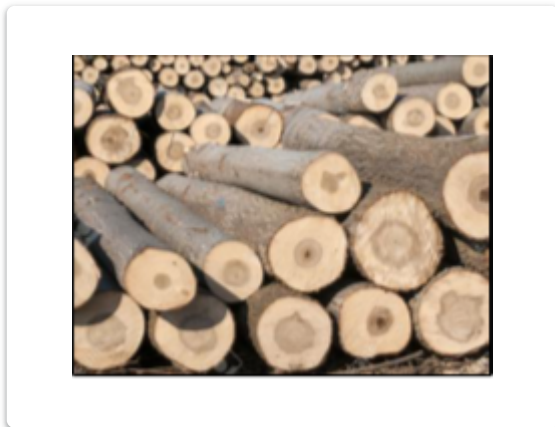

a)

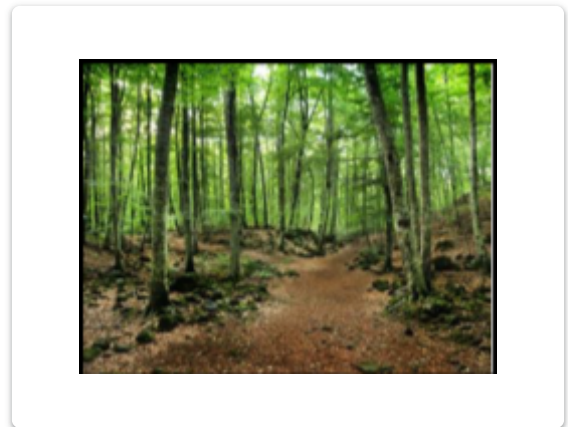

b)

9. 5. A quin grup creus que pertanyen els ximpanzés?

*Marqueu només un oval.*

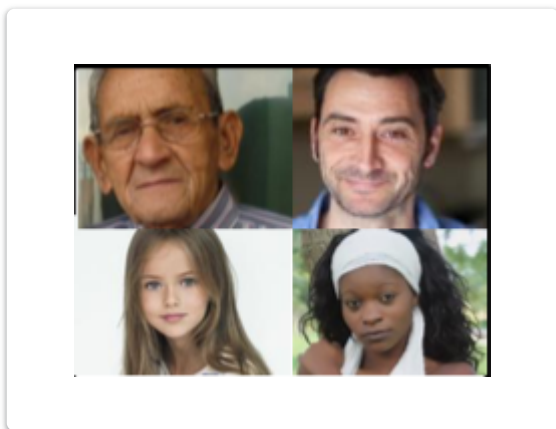

a)

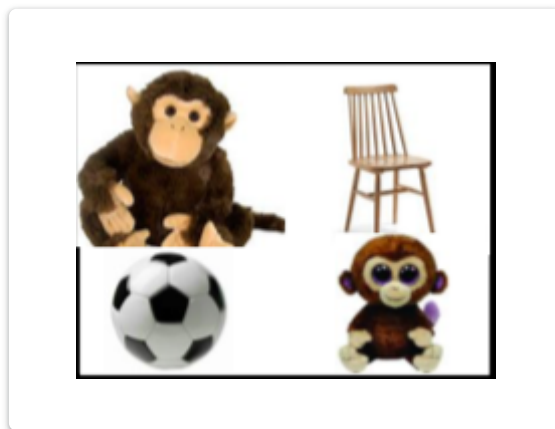

b)

10. 6. Quina d'aquestes fotos prefereixes veure en un anunci de Fundació Mona?

*Marqueu només un oval.*

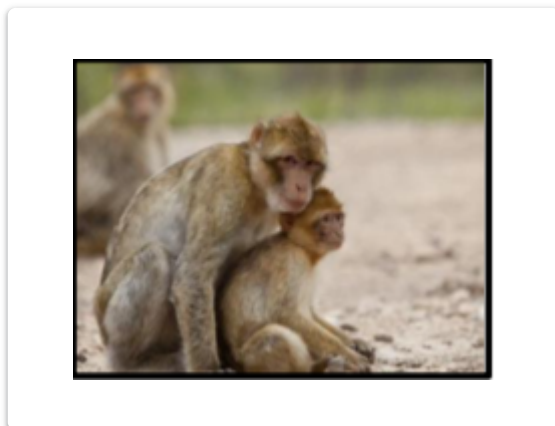

a)

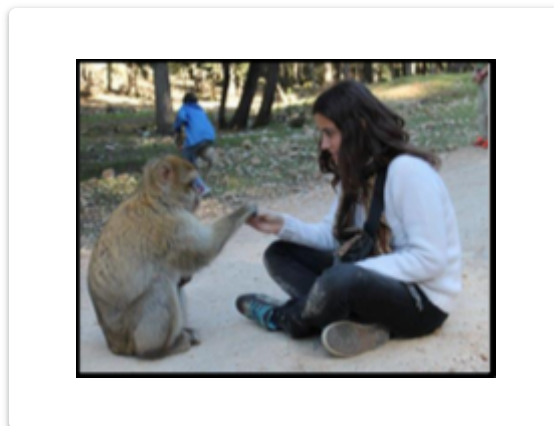

b)

11. 7. En quina d'aquestes dues situacions preferiries estar?

*Marqueu només un oval.*

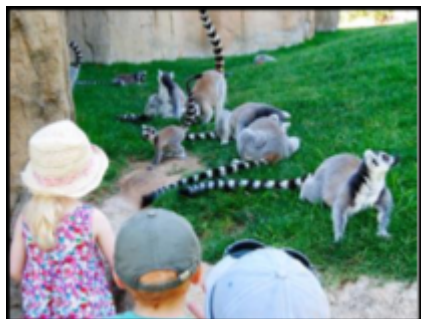

a)

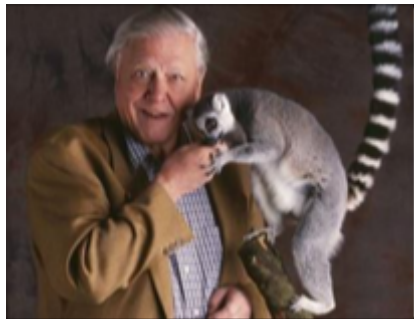

b)

12. 8. Com t'agrada més veure a aquest ximpanzé?

*Marqueu només un oval.*

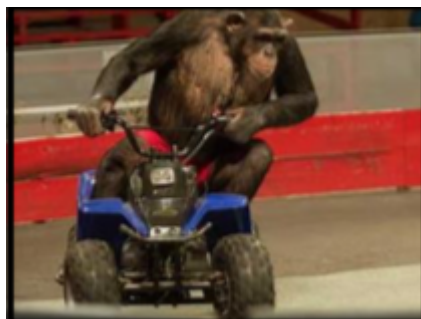

a)

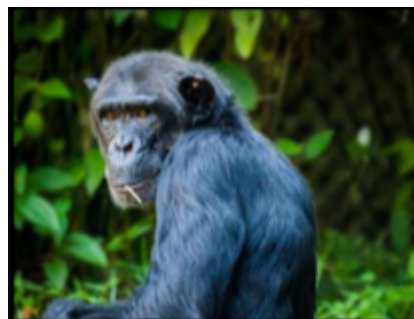

b)

---

Google no ha creat ni aprovat aquest contingut.

Google Formularis
