# Supplementary material for: The impact of sanctuary visits on children’s knowledge and attitudes toward primate welfare and conservation
Source: PeerJ. 2023 Jun 16;11:e15074. doi: 10.7717/peerj.15074 (PMC10284066; doi:10.7717/peerj.15074)
Supplement: Supplemental Information 2 [file peerj-11-15074-s002.xlsx]

## Sheet: Attitude_Assessment
Subject	Year	Date	Age	Grade	Condiction_EEA	Sex	Question_1	Question_2	Question_3	Question_4	Question_5	Question_6	Question_7	Question_8	Proportion_correct
1	2018	2018-03-19	12	Secondary	PRE	Boy	0	1	1	1		1	1	0	0.625
2	2018	2018-03-19	12	Secondary	PRE	Girl	1	1	0	1	1	0	0	1	0.625
3	2018	2018-03-19	13	Secondary	PRE	Boy	1	1	1	1	1	0	1	1	0.875
4	2018	2018-03-19	13	Secondary	PRE	Girl	1	0	0	1	1	0	0	1	0.5
5	2018	2018-03-19	13	Secondary	PRE	Girl	1	1	0	1	1	1	1	1	0.875
6	2018	2018-03-19	12	Secondary	PRE	Boy	1	1	1	1	1	1	0	0	0.75
7	2018	2018-03-19	12	Secondary	PRE	Boy	1	1	1	1	0	1	0	1	0.75
8	2018	2018-03-20	12	Secondary	PRE	Boy	1	1	1	1	1	1	1	1	1
9	2018	2018-03-19	12	Secondary	PRE	Boy	0	0	0	0	0	1	0	1	0.25
10	2018	2018-03-19	13	Secondary	PRE	Boy	1	1	1	1	1	0	0	1	0.75
11	2018	2018-03-19	12	Secondary	PRE	Boy	1	0	1	1	1	1	0	0	0.625
12	2018	2018-03-19	12	Secondary	PRE	Boy	1	0	1	1	1	0	0	1	0.625
13	2018	2018-03-19	12	Secondary	PRE	Girl	1	1	1	1	1	1	0	1	0.875
14	2018	2018-03-19	12	Secondary	PRE	Girl	1	1	1	1	1	1	1	1	1
15	2018	2018-03-19	13	Secondary	PRE	Girl	1	0	1	1	1	0	0	1	0.625
16	2018	2018-03-19	13	Secondary	PRE	Girl	1	1	1	1	1	0	0	1	0.75
17	2018	2018-03-19	12	Secondary	PRE	Girl	1	1	1	1	1	1	0	1	0.875
18	2018	2018-03-19	13	Secondary	PRE	Girl	1	1	0	1	1	1	1	1	0.875
19	2018	2018-03-19	13	Secondary	PRE	Girl	1	1	1	1	1	0	1	1	0.875
20	2018	2018-04-03	17	Baccalaureate	PRE	Boy	1	1	1	1	1	1	0	0	0.75
21	2018	2018-04-03	18	Baccalaureate	PRE	Boy	1	1	1	1	1	1	0	1	0.875
22	2018	2018-04-03	17	Baccalaureate	PRE	Girl	1	1	0	1	1	0	0	1	0.625
23	2018	2018-04-03	17	Baccalaureate	PRE	Boy	1	1	1	1	1	0	0	1	0.75
24	2018	2018-04-03	17	Baccalaureate	PRE	Boy	1	0	0	1	1	1	0	1	0.625
25	2018	2018-04-03	17	Baccalaureate	PRE	Girl	1	0	0	1	0	0	0	1	0.375
26	2018	2018-04-03	17	Baccalaureate	PRE	Girl	1	1	0	1	1	0	1	1	0.75
27	2018	2018-04-03	17	Baccalaureate	PRE	Girl	1	0	1	1	0	1	1	1	0.75
28	2018	2018-04-03	17	Baccalaureate	PRE	Girl	1	1	1	1	1	1	1	1	1
29	2018	2018-04-03	18	Baccalaureate	PRE	Girl	1	1	1	1	1	1	1	1	1
30	2018	2018-04-03	17	Baccalaureate	PRE	Boy	1	1	1	1	1	1	0	1	0.875
31	2018	2018-04-03	18	Baccalaureate	PRE	Girl	1	1	0	1	1	1	1	1	0.875
32	2018	2018-04-03	17	Baccalaureate	PRE	Girl	1	1	0	1	1	1	1	1	0.875
33	2018	2018-04-03	17	Baccalaureate	PRE	Girl	1	1	0	1	1	1	0	1	0.75
34	2018	2018-04-03	17	Baccalaureate	PRE	Girl	1	1	1	1	1	1	0	1	0.875
35	2018	2018-04-03	17	Baccalaureate	PRE	Boy	1	1	1	1	1	0	0	1	0.75
36	2018	2018-04-03	17	Baccalaureate	PRE	Girl	1	1	0	1	1	1	1	1	0.875
37	2018	2018-04-05	8	Primary	PRE	Girl	0	1	1	1	1	1	1	0	0.75
38	2018	2018-04-05	9	Primary	PRE	Boy	1	0	1	1	0	0	0	1	0.5
39	2018	2018-04-05	8	Primary	PRE	Girl	1	1	1	1	1	0	0	1	0.75
40	2018	2018-04-05	8	Primary	PRE	Girl	1	1	1	1	1	0	1	1	0.875
41	2018	2018-04-05	9	Primary	PRE	Boy	1	0	1	1	1	0	1	1	0.75
42	2018	2018-04-05	8	Primary	PRE	Girl	1	0	1	1	1	0	1	1	0.75
43	2018	2018-04-05	8	Primary	PRE	Girl	1	1	1	1	1	0	1	1	0.875
44	2018	2018-04-05	9	Primary	PRE	Boy	0	1	1	1	1	0	0	1	0.625
45	2018	2018-04-05	8	Primary	PRE	Girl	1	1	1	1	0	0	0	0	0.5
46	2018	2018-04-05	9	Primary	PRE	Girl	0	1	1	1	0	1	0	0	0.5
47	2018	2018-04-05	9	Primary	PRE	Girl	1	0	1	1	1	0	0	0	0.5
48	2018	2018-04-05	9	Primary	PRE	Girl	1	1	0		1	0	0	1	0.5
49	2018	2018-04-05	9	Primary	PRE	Girl	1	0	1	1	1	1	1	1	0.875
50	2018	2018-04-05	8	Primary	PRE	Girl	1	0	1		0	0	1	1	0.5
51	2018	2018-04-05	8	Primary	PRE	Boy	1	0	0	1		1	1	1	0.625
52	2018	2018-04-05	8	Primary	PRE	Girl	1	0	1	1	0	1	1	1	0.75
53	2018	2018-04-05	8	Primary	PRE	Girl	0	1	1	1	0	0	1	1	0.625
54	2018	2018-04-05	8	Primary	PRE	Boy	1	1	0	1	0	1	1	1	0.75
55	2018	2018-04-05	8	Primary	PRE	Boy	0	1	1	1	0	0	0	1	0.5
56	2018	2018-04-05	8	Primary	PRE	Boy	1	1	1	1	1	1	1	1	1
57	2018	2018-04-05	8	Primary	PRE	Boy	1	1	1	1	1	1	1	1	1
58	2018	2018-04-05	9	Primary	PRE	Boy	1	1	1	1	0	1	1	0	0.75
59	2018	2018-04-05	8	Primary	PRE	Boy	0	1	0	1	0	1	1	1	0.625
60	2018	2018-04-05	8	Primary	PRE	Boy	0	1		1	0	0	1	1	0.5
61	2018	2018-04-05	8	Primary	PRE	Boy	1	1	1	1	1	1	0	1	0.875
62	2018	2018-04-16	17	Baccalaureate	PRE	Boy	1	1	1	1	1	0	0	0	0.625
63	2018	2018-04-16	17	Baccalaureate	PRE	Girl	1	1	1	1	1	1	1	1	1
64	2018	2018-04-16	17	Baccalaureate	PRE	Boy	1	1	0	1	1	0	0	1	0.625
65	2018	2018-04-16	18	Baccalaureate	PRE	Girl	1	1	1	1	1	0	0	1	0.75
66	2018	2018-04-16	16	Baccalaureate	PRE	Girl	1	1	0	1	0	1	0	1	0.625
67	2018	2018-04-16	16	Baccalaureate	PRE	Girl	1	0	0	1	0	1	0	0	0.375
68	2018	2018-04-16	17	Baccalaureate	PRE	Girl	1	1	1	1	1	1	0	0	0.75
69	2018	2018-04-16	16	Baccalaureate	PRE	Girl	1	1	0	1	1	1	0	1	0.75
70	2018	2018-04-16	16	Baccalaureate	PRE	Girl	1	1	0	1	1	1	0	1	0.75
71	2018	2018-04-16	16	Baccalaureate	PRE	Girl	0	1	1	1	1	1	1	1	0.875
72	2018	2018-04-16	17	Baccalaureate	PRE	Boy	1	1	1	1	1	1	1	1	1
73	2018	2018-04-16	16	Baccalaureate	PRE	Girl	1	1	0	1	1	1	1	1	0.875
74	2018	2018-04-16	18	Baccalaureate	PRE	Girl	1	0	0	1	1	1	0	1	0.625
75	2018	2018-04-16	16	Baccalaureate	PRE	Girl	1	1	1	1	1	1	1	1	1
76	2018	2018-04-16	16	Baccalaureate	PRE	Boy	1	0	0	1	0	0	0	1	0.375
77	2018	2018-04-16	17	Baccalaureate	PRE	Girl	1	0	1	1	1	0	1	1	0.75
78	2018	2018-04-16	17	Baccalaureate	PRE	Girl	1	0	1	1	1	0	0	1	0.625
79	2018	2018-04-16	16	Baccalaureate	PRE	Girl	1	1	1	1	1	0	0	1	0.75
80	2018	2018-04-16	17	Baccalaureate	PRE	Girl	0	1	1	1	0	1	1	1	0.75
81	2018	2018-04-16	17	Baccalaureate	PRE	Girl	1	1	1	1	1	1	1	1	1
82	2018	2018-04-25	12	Secondary	PRE	Girl	1	0	1	1		1	1	0	0.625
83	2018	2018-04-25	12	Secondary	PRE	Girl	1	1	1	1	1	1	0	1	0.875
84	2018	2018-04-25	13	Secondary	PRE	Girl	1	1	1	1	1	1	0	1	0.875
85	2018	2018-04-25	13	Secondary	PRE	Boy	1	1	0	1	1	0	1	0	0.625
86	2018	2018-04-25	13	Secondary	PRE	Boy	1	1	0	1	1	0	0	1	0.625
87	2018	2018-04-25	12	Secondary	PRE	Boy	0	0	1	1	0	0	1	0	0.375
88	2018	2018-04-25	12	Secondary	PRE	Boy	1	1	0	1		0	1	1	0.625
89	2018	2018-04-25	13	Secondary	PRE	Boy	1	0	1		0	1	1	1	0.625
90	2018	2018-04-25	12	Secondary	PRE	Boy	1	0	1	1	1	0	0	1	0.625
91	2018	2018-04-25	12	Secondary	PRE	Boy	1	0	1	1	1	0	0	1	0.625
92	2018	2018-04-25	14	Secondary	PRE	Girl	1	1	0	1	1	0	1	1	0.75
93	2018	2018-04-25	13	Secondary	PRE	Girl	1	1	0	1	0	1	0	1	0.625
94	2018	2018-04-25	12	Secondary	PRE	Boy	1	1	0	1	0	1	0	1	0.625
95	2018	2018-04-25	13	Secondary	PRE	Boy	1	1	1	1	0	1	0	1	0.75
96	2018	2018-04-25	14	Secondary	PRE	Boy	1	1	0	1	1	0	1	0	0.625
97	2018	2018-04-25	13	Secondary	PRE	Girl	1	0	1	1	1	0	0	1	0.625
98	2018	2018-04-25	13	Secondary	PRE	Girl	1	0	1	1	1	0	0	1	0.625
99	2018	2018-05-07	12	Secondary	PRE	Girl	1	1	1	1	1	1	0	1	0.875
100	2018	2018-05-07	13	Secondary	PRE	Girl	1	0	1	0	1	0	1	1	0.625
101	2018	2018-05-07	13	Secondary	PRE	Girl	1	1	1	1	1	1	0	1	0.875
102	2018	2018-05-07	13	Secondary	PRE	Girl	1	0	0	1	1	0	1	1	0.625
103	2018	2018-05-07	13	Secondary	PRE	Girl	1	1	1	1	1	1	0	1	0.875
104	2018	2018-05-07	13	Secondary	PRE	Girl	1	1	1	1	1	1	0	1	0.875
105	2018	2018-05-07	13	Secondary	PRE	Girl	1	1	1	1	1	1	1	1	1
106	2018	2018-05-07	12	Secondary	PRE	Girl	1	1	1	1	1	0	0	1	0.75
107	2018	2018-05-07	12	Secondary	PRE	Girl	1	0	0	1	1	0	1	1	0.625
108	2018	2018-05-07	13	Secondary	PRE	Girl	1	1	1	1	1	0	0	0	0.625
109	2018	2018-05-07	13	Secondary	PRE	Girl	1	0	1	1	1	1	1	1	0.875
110	2018	2018-05-07	12	Secondary	PRE	Girl	1	0	1	1	1	0	0	1	0.625
111	2018	2018-05-07	12	Secondary	PRE	Girl	1	0	1	1	1	0	0	1	0.625
112	2018	2018-05-07	12	Secondary	PRE	Boy	1	1	0	0	1	0	1	1	0.625
113	2018	2018-05-07	12	Secondary	PRE	Boy	1	0	0	1	1	0	0	1	0.5
114	2018	2018-05-07	12	Secondary	PRE	Boy	1	0	0	1	1	1	0	0	0.5
115	2018	2018-05-07	12	Secondary	PRE	Boy	1	0	1	1	1	0	1	0	0.625
116	2018	2018-05-07	13	Secondary	PRE	Girl	1	0	0	1	1	0	1	0	0.5
117	2018	2018-05-07	13	Secondary	PRE	Boy	1	1	1	1	1	0	1	1	0.875
118	2018	2018-05-07	12	Secondary	PRE	Boy	1	0	0	1	1	1	0	1	0.625
119	2018	2018-05-07	12	Secondary	PRE	Boy	1	1	1	1	1	0	0	1	0.75
120	2018	2018-05-07	12	Secondary	PRE	Boy	1	1	1	1	1	1	0	0	0.75
121	2018	2018-05-07	12	Secondary	PRE	Boy	1	1	1	0	0	1	1	1	0.75
122	2018	2018-05-07	12	Secondary	PRE	Boy	0	0	1	1	1	0	0	0	0.375
123	2018	2018-05-07	13	Secondary	PRE	Boy	0	0	1		1	0	0	1	0.375
124	2018	2018-05-07	12	Secondary	PRE	Boy	1	0	1	1	1	1	0	1	0.75
125	2018	2018-05-07	13	Secondary	PRE	Boy	1	0	0	1	0	0	0	1	0.375
126	2018	2018-05-07	12	Secondary	PRE	Boy	1	1	1	1	1	1	0	1	0.875
127	2018	2018-05-07	13	Secondary	PRE	Boy	1	0	1	1	1	0	0	0	0.5
128	2018	2018-05-07	13	Secondary	PRE	Boy	0	1	1	1	1	0	0	1	0.625
129	2018	2018-05-07	13	Secondary	PRE	Boy	1	1	1	1	1	0	0	1	0.75
130	2018	2018-02-13	17	Baccalaureate	PRE	Girl	1	0	0	1	1	0	0	1	0.5
131	2018	2018-05-15	17	Baccalaureate	PRE	Boy	1	1	1	1	1	1	1	1	1
132	2018	2018-05-15	17	Baccalaureate	PRE	Boy	1	1	1	1	1	0	0	1	0.75
133	2018	2018-05-15	16	Baccalaureate	PRE	Girl	1	0	1	1	0	1	0	1	0.625
134	2018	2018-05-15	17	Baccalaureate	PRE	Girl	1	1	0	1	1	1	1	1	0.875
135	2018	2018-05-15	16	Baccalaureate	PRE	Boy	1	0	0	1	1	0	1	1	0.625
136	2018	2018-05-15	18	Baccalaureate	PRE	Girl	1	1	1	1	1	0	0	1	0.75
137	2018	2018-05-15	17	Baccalaureate	PRE	Girl	1	1	0	1	1	0	0	1	0.625
138	2018	2018-05-15	17	Baccalaureate	PRE	Girl	1	1	1	1	1	1	0	1	0.875
139	2018	2018-05-15	18	Baccalaureate	PRE	Boy	1	0	0	1	1	0	0	1	0.5
140	2018	2018-05-15	17	Baccalaureate	PRE	Girl	1	0	1	1	1	1	0	1	0.75
141	2018	2018-05-15	17	Baccalaureate	PRE	Boy	0	1	0	1	1	1	1	1	0.75
142	2018	2018-05-15	18	Baccalaureate	PRE	Girl	0	1	1	1	1	0	0	1	0.625
143	2018	2018-05-15	18	Baccalaureate	PRE	Girl	0	1	1	1	1	1	0	0	0.625
144	2018	2018-05-15	18	Baccalaureate	PRE	Girl	0	1	1	1	1	1	0	1	0.75
145	2018	2018-05-15	17	Baccalaureate	PRE	Girl	1	1	1	1	1	1	1	0	0.875
146	2018	2018-05-15	17	Baccalaureate	PRE	Girl	0	0	1	1	1	0	0	1	0.5
147	2018	2018-05-15	18	Baccalaureate	PRE	Girl	1	1	0	1	1	0	0	1	0.625
148	2018	2018-05-15	18	Baccalaureate	PRE	Girl	0	0	1	1	1	0	0	1	0.5
149	2018	2018-05-15	18	Baccalaureate	PRE	Boy	1	1	1		0	0	0	1	0.5
150	2018	2018-05-15	16	Baccalaureate	PRE	Girl	1	1	0	1	1	1	0	1	0.75
151	2018	2018-05-15	17	Baccalaureate	PRE	Girl	1	1	1	1	1	1	0	1	0.875
152	2018	2018-05-23	15	Secondary	PRE	Boy	1	1	1	1	1	1	1	1	1
153	2018	2018-05-23	16	Secondary	PRE	Girl	1	1	1	1	1	1	0	1	0.875
154	2018	2018-05-23	14	Secondary	PRE	Boy	1	0	1	1	1	0	0	1	0.625
155	2018	2018-05-23	14	Secondary	PRE	Boy	1	0	0	1	0	0	0	1	0.375
156	2018	2018-05-23	15	Secondary	PRE	Girl	0	0	0	1	0	0	1	0	0.25
157	2018	2018-05-23	15	Secondary	PRE	Girl	1	1	0	1	1	1	1	1	0.875
158	2018	2018-05-23	16	Secondary	PRE	Girl	1	1	1	1	1	0	0	1	0.75
159	2018	2018-05-23	14	Secondary	PRE	Boy	1	1	1	1	0	0		0	0.5
160	2018	2018-05-23	12	Secondary	PRE	Girl	1	0	1	0	1	0	0	0	0.375
161	2018	2018-05-23	15	Secondary	PRE	Girl	1	1	1	1	1	1	0	1	0.875
162	2018	2018-05-23	15	Secondary	PRE	Boy	1	0	0	1	1	0	0	1	0.5
163	2018	2018-05-23	15	Secondary	PRE	Boy	1	1	1	0	0	1	0	1	0.625
164	2018	2018-05-23	15	Secondary	PRE	Girl	1	1	0	1	1	1	1	1	0.875
165	2018	2018-05-23	14	Secondary	PRE	Girl	1	1	1	1	1	1	0	1	0.875
166	2018	2018-05-23	14	Secondary	PRE	Girl	1	1	0	1	1	0	1	1	0.75
167	2018	2018-05-23	13	Secondary	PRE	Boy	0	0	1	1	1		1	0	0.5
168	2018	2018-05-23	14	Secondary	PRE	Boy	1	0	1	1	1	0	1	1	0.75
169	2018	2018-05-23	14	Secondary	PRE	Boy	1	1	1	1	1	0	0	1	0.75
170	2018	2018-05-23	14	Secondary	PRE	Girl	1	0	0	1	0	0	1	1	0.5
171	2018	2018-05-23	15	Secondary	PRE	Boy	1	0	1	1	1	0	1	1	0.75
172	2018	2018-05-23	15	Secondary	PRE	Boy	1	0	1	1	1	0	1		0.625
173	2018	2018-05-23	15	Secondary	PRE	Boy	1	1	1	1	1	1	1	1	1
174	2018	2018-05-24	9	Primary	PRE	Boy	1	1	0	1	0	0	0	1	0.5
175	2018	2018-05-24	9	Primary	PRE	Girl	1	1	0	1	0	0	0	1	0.5
176	2018	2018-05-24	10	Primary	PRE	Boy	1	1	1	1	1	0	1	1	0.875
177	2018	2018-05-24	10	Primary	PRE	Boy	1	1	0	1	1	0	0	1	0.625
178	2018	2018-05-24	10	Primary	PRE	Girl	1	1	1	1	0	1	1	1	0.875
179	2018	2018-05-24	9	Primary	PRE	Boy	1	1	1	1	1	1	0	1	0.875
180	2018	2018-05-24	10	Primary	PRE	Girl	0	0	0		1	1	0	1	0.375
181	2018	2018-05-24	9	Primary	PRE	Girl	1	1	0	1	0	0	0	1	0.5
182	2018	2018-05-24	10	Primary	PRE	Boy	1	1	0	1	0	0	0	0	0.375
183	2018	2018-05-24	10	Primary	PRE	Boy	0	0	1	1	1	0	0	0	0.375
184	2018	2018-05-24	10	Primary	PRE	Girl	1	1	1	1	1	1	0	1	0.875
185	2018	2018-05-24	9	Primary	PRE	Boy	1	1	0	1	0	0	1	1	0.625
186	2018	2018-05-24	10	Primary	PRE	Boy	1	1		0	0	1	0	0	0.375
187	2018	2018-05-24	10	Primary	PRE	Boy	0	1	0	1	1	1	0	0	0.5
188	2018	2018-05-24	10	Primary	PRE	Girl	1	0	0	1	1	1	0	1	0.625
189	2018	2018-05-24	10	Primary	PRE	Boy	1	1	1	1	1	0	1	0	0.75
190	2018	2018-05-24	10	Primary	PRE	Boy	1	1	1	1	1	0	0	1	0.75
191	2018	2018-05-24	10	Primary	PRE	Girl	1	1	1	1	1	1	0	1	0.875
192	2018	2018-05-24	10	Primary	PRE	Girl	1	1	0	1	1	0	0	1	0.625
193	2018	2018-05-24	10	Primary	PRE	Girl	1	1	1	1	1	0	0	1	0.75
194	2018	2018-05-24	9	Primary	PRE	Boy	1	1	0	0	0	1	0	0	0.375
195	2018	2018-05-24	8	Primary	PRE	Girl	1	1	1	1	1	0	0	0	0.625
196	2018	2018-05-24	8	Primary	PRE	Girl	1	1	0	0	0	0	1	1	0.5
197	2018	2018-05-24	8	Primary	PRE	Boy	1	1	0	1	1	1	1	1	0.875
198	2018	2018-06-01	10	Primary	PRE	Girl	1	1	0	1	1	1	1	1	0.875
199	2018	2018-06-01	10	Primary	PRE	Boy	1	0	1	1	1	1	1	0	0.75
200	2018	2018-06-01	11	Primary	PRE	Girl	1	1	1	1	1	1	1	1	1
201	2018	2018-06-01	11	Primary	PRE	Girl	0	1	1	1	1	0	0	1	0.625
202	2018	2018-06-01	11	Primary	PRE	Boy	1	0	1	1	1	0	0	1	0.625
203	2018	2018-06-01	10	Primary	PRE	Girl	0	1	1	1	1	1	1	1	0.875
204	2018	2018-06-01	10	Primary	PRE	Boy	1	1	1	1	1	1	1	1	1
205	2018	2018-06-01	11	Primary	PRE	Girl	1	1	1	1	1	1	1	1	1
206	2018	2018-06-01	11	Primary	PRE	Girl	0	1	1	1	1	1	0	1	0.75
207	2018	2018-06-01	11	Primary	PRE	Girl	1	0	1	1	1	0	0	1	0.625
208	2018	2018-06-01	11	Primary	PRE		1	1	1	1	1	1	1	1	1
209	2018	2018-06-01	11	Primary	PRE	Girl	1	1	1	1	1	1	1	1	1
210	2018	2018-06-01	10	Primary	PRE	Boy	1	1	1	1	1	1	1	1	1
211	2018	2018-06-04	10	Primary	PRE	Girl	1	1	0	1	1	0	0	1	0.625
212	2018	2018-06-04	11	Primary	PRE	Girl	0	0	0	1	1	0	0	1	0.375
213	2018	2018-06-04	11	Primary	PRE	Girl	0	1	0	1	1	1	0	1	0.625
214	2018	2018-06-04	10	Primary	PRE	Boy	1	1	1	1	1	1	1	1	1
215	2018	2018-06-04	11	Primary	PRE	Girl	1	1	1	1	1	0	0	1	0.75
216	2018	2018-06-04	11	Primary	PRE	Boy	1	1	1	1	1	1	1	1	1
217	2018	2018-06-04	11	Primary	PRE	Boy	1	0	0	1	0	0	1	1	0.5
218	2018	2018-06-04	11	Primary	PRE	Girl	1	1	1	1	1	1	0	1	0.875
219	2018	2018-06-04	11	Primary	PRE	Boy	1	0	0	1	1	0	1	1	0.625
220	2018	2018-06-04	10	Primary	PRE	Boy	1	1	1	1	1	1	0	1	0.875
221	2018	2018-06-04	10	Primary	PRE	Boy	1	1	1	1	1	1	0	1	0.875
222	2018	2018-06-04	11	Primary	PRE	Girl	1	1	1	1	1	0	0	1	0.75
223	2018	2018-06-04	11	Primary	PRE	Girl	1	0	0	0	0	0	1	1	0.375
224	2018	2018-06-04	10	Primary	PRE	Girl	1	1	1	1	1	0	0	1	0.75
225	2018	2018-06-04	11	Primary	PRE	Boy	1	1	1	1	1	1	0	1	0.875
226	2018	2018-06-04	10	Primary	PRE	Girl	1	0	0	1	1	0	0	1	0.5
227	2018	2018-06-04	10	Primary	PRE	Boy	1	1	1	1	1	1	1	1	1
228	2018	2018-06-04	10	Primary	PRE	Girl	1	1	0	1	1	1	1	1	0.875
229	2018	2018-06-04	10	Primary	PRE	Girl	1	1	1	1	1	0	1	1	0.875
230	2018	2018-06-04	11	Primary	PRE	Girl	0	1	1	1	1	1	1	1	0.875
231	2018	2018-06-05	11	Primary	PRE	Boy	0	0	0	1	1	0	0	1	0.375
232	2018	2018-06-05	10	Primary	PRE	Girl	1	0	1	1	1	0	1	1	0.75
233	2018	2018-06-05	10	Primary	PRE	Boy	0	0	0	1	0	0	0	0	0.125
234	2018	2018-06-05	11	Primary	PRE	Boy	0	0	0	1	1	0	0	0	0.25
235	2018	2018-06-05	10	Primary	PRE	Girl	1	0	0	1	1	0	0	1	0.5
236	2018	2018-06-05	11	Primary	PRE	Girl	1	1	1	0	1	0	0	0	0.5
237	2018	2018-06-05	12	Primary	PRE	Boy	1	1	0	1	0	0	1	0	0.5
238	2018	2018-06-05	11	Primary	PRE	Girl	0	0	1	1	1	0	1	1	0.625
239	2018	2018-06-05	11	Primary	PRE	Boy	1	1	1	1	0	1	0	1	0.75
240	2018	2018-06-05	11	Primary	PRE	Boy	1	1	1	1	1	0	0	0	0.625
241	2018	2018-06-05	11	Primary	PRE	Girl	1	1	0	1	1	1	1	1	0.875
242	2018	2018-06-05	11	Primary	PRE	Girl	1	1	1	1	1	1	0	1	0.875
243	2018	2018-06-05	10	Primary	PRE	Girl	1	0	0	1	1	0	0	1	0.5
244	2018	2018-06-19	12	Secondary	PRE	Girl	1	1	1	1	1	0	0	1	0.75
245	2018	2018-06-19	13	Secondary	PRE	Girl	1	1	0	1	0	0	1	1	0.625
246	2018	2018-06-19	12	Secondary	PRE	Girl	0	1	1	1	1	1	1	1	0.875
247	2018	2018-06-19	12	Secondary	PRE	Boy	1	0	1	1	0	0	0	1	0.5
248	2018	2018-06-19	13	Secondary	PRE	Boy	1	1	0	1	1	0	0	1	0.625
249	2018	2018-06-19	12	Secondary	PRE	Girl	1	0	1	1	1	0	0	1	0.625
250	2018	2018-06-19	12	Secondary	PRE	Boy	1	0	0	1	0	0	1	1	0.5
251	2018	2018-06-19	12	Secondary	PRE	Girl	1	0	1	1	1	0	0	1	0.625
252	2018	2018-06-19	13	Secondary	PRE	Boy	1	0	1	1	1	0	0	1	0.625
253	2018	2018-06-19	12	Secondary	PRE	Boy	1	1	1	1	1	1	0	1	0.875
254	2018	2018-06-19	13	Secondary	PRE	Boy	1	0	1	1	1	0	0	1	0.625
255	2018	2018-06-19	12	Secondary	PRE	Boy	1	0	0	1	1	0	0	1	0.5
256	2018	2018-06-19	12	Secondary	PRE	Girl	1	1	0	1	1	1	1	1	0.875
257	2018	2018-06-19	12	Secondary	PRE	Girl	1	1	1	1	1	1	1	1	1
258	2018	2018-06-19	12	Secondary	PRE	Boy	0	0	1	1	1	0	0	1	0.5
259	2018	2018-06-19	12	Secondary	PRE	Boy	1	0	1	1	1	0	0	1	0.625
260	2018	2018-06-19	13	Secondary	PRE	Boy	1	0	0	1	1	0	0	1	0.5
261	2018	2018-06-19	13	Secondary	PRE	Girl	1	0	1	1		1	1	1	0.75
262	2018	2018-06-19	13	Secondary	PRE	Boy	1	1	1	1	1	1	1	1	1
263	2018	2018-06-19	13	Secondary	PRE	Girl	1	1	0	1	0	1	1	1	0.75
264	2018	2018-06-19	13	Secondary	PRE	Girl	1	0	0	1	1	1	0	0	0.5
265	2018	2018-06-19	13	Secondary	PRE	Girl	1	1	1	1	1	0	1	1	0.875
266	2018	2018-06-19	13	Secondary	PRE	Girl	1	1	0	1	0	1	1	1	0.75
267	2018	2018-06-19	13	Secondary	PRE	Girl	1	0	1	1	1	0	0	1	0.625
268	2018	2018-06-19	13	Secondary	PRE	Girl	1	1	0	1	0	1	1	1	0.75
269	2019	2018-06-19	13	Secondary	PRE	Girl	0	0	0	1	1	0	0	1	0.375
270	2019	2019-02-26	8	Primary	PRE	Boy	1	0	1	0	1	0	0	1	0.5
271	2019	2019-02-26	8	Primary	PRE	Boy	1	1	1	0	1	1	1	1	0.875
272	2019	2019-02-26	9	Primary	PRE	Girl	1	1	1	1	1	0	0	1	0.75
273	2019	2019-02-26	8	Primary	PRE	Boy	0	0	0	1	0	1	1	1	0.5
274	2019	2019-02-26	9	Primary	PRE	Boy	1	1	1	0	0	0	0	1	0.5
275	2019	2019-02-26	8	Primary	PRE	Boy	1	1	1	1	1	0	0	1	0.75
276	2019	2019-02-26	8	Primary	PRE	Boy	1	1	1	1		0	1	1	0.75
277	2019	2019-02-26	9	Primary	PRE	Boy	1	1	0	1	0	1	0	1	0.625
278	2019	2019-02-26	8	Primary	PRE	Boy	0	0	0	0	0	1	0	1	0.25
279	2019	2019-02-26	8	Primary	PRE	Girl	1	1	1	1	1	1	0	1	0.875
280	2019	2019-02-26	8	Primary	PRE	Boy	1	1	1	1	0	0	1	1	0.75
281	2019	2019-02-26	8	Primary	PRE	Boy	0	0	0	1	1	0	1	1	0.5
282	2019	2019-02-26	8	Primary	PRE	Boy	1	1	1	1	1	0	0	1	0.75
283	2019	2019-02-26	8	Primary	PRE	Boy	0	1	0	0	0	0	1	1	0.375
284	2019	2019-02-26	9	Primary	PRE	Boy	1	0	1	1	0	0	0	1	0.5
285	2019	2019-03-06	10	Primary	PRE	Boy	1	1	1	1	1	0	0	1	0.75
286	2019	2019-03-06	10	Primary	PRE	Boy	1	0	1	1	1	0	1	1	0.75
287	2019	2019-03-06	10	Primary	PRE	Girl	1	1	1	1	1	1	1	1	1
288	2019	2019-03-06	10	Primary	PRE	Girl	1	1	1	1	1	1	0	1	0.875
289	2019	2019-03-06	10	Primary	PRE	Boy	1	1	1	1	1	1	1	1	1
290	2019	2019-03-06	10	Primary	PRE	Girl	1	1	1	1	0	1	1	1	0.875
291	2019	2019-03-11	11	Primary	PRE	Girl	1	0	1	1	1	0	0	1	0.625
292	2019	2019-03-11	11	Primary	PRE	Boy	1	1	0	1	1	1	0	1	0.75
293	2019	2019-03-11	11	Primary	PRE	Girl	1	1	1	1	1	0	1	1	0.875
294	2019	2019-03-11	11	Primary	PRE	Girl	1	0	1	0	1	0	0	1	0.5
295	2019	2019-03-11	11	Primary	PRE	Girl	1	0	1	1	1	0	1	1	0.75
296	2019	2019-03-11	11	Primary	PRE	Boy	1	1	1	1	1	1	0	1	0.875
297	2019	2019-03-11	11	Primary	PRE	Girl	1	1	1	1	1	1	0	1	0.875
298	2019	2019-03-11	12	Primary	PRE	Girl	1	0	1	1	1	0	0	1	0.625
299	2019	2019-03-11	12	Primary	PRE	Girl	1	1	1	1	1	0	1	1	0.875
300	2019	2019-03-11	11	Primary	PRE	Boy	1	1	1	1	1	0	0	1	0.75
301	2019	2019-03-11	12	Primary	PRE	Boy	1	1	1	1	1	0	0	1	0.75
302	2019	2019-03-11	11	Primary	PRE	Boy	1	0	1	1	1	1	0	0	0.625
303	2019	2019-03-11	12	Primary	PRE	Girl	1	1	1	1	1	0	1	1	0.875
304	2019	2019-03-11	11	Primary	PRE	Boy	1	1	1	1	1	0	0	1	0.75
305	2019	2019-03-11	11	Primary	PRE	Girl	1	1	1	1	1	1	1	1	1
306	2019	2019-03-11	11	Primary	PRE	Boy	1	1	1	1	1	1	0	0	0.75
307	2019	2019-03-11	11	Primary	PRE	Girl	1	1	1	1	1	1	0	1	0.875
308	2019	2019-03-11	12	Primary	PRE	Boy	1	1	1	1	1	1	1	1	1
309	2019	2019-03-11	11	Primary	PRE	Boy	1	1	1	1	1	1	0	0	0.75
310	2019	2019-03-11	11	Primary	PRE	Girl	1	1	1	1	1	1	1	1	1
311	2019	2019-03-11	11	Primary	PRE	Boy	1	1	1	1	1	1	0	0	0.75
312	2019	2019-03-11	11	Primary	PRE	Boy	1	1	1	1	1	0	0	1	0.75
313	2019	2019-03-12	9	Primary	PRE	Boy	1	1	1	1	1	1	1	1	1
314	2019	2019-03-12	8	Primary	PRE	Girl	1	1	0	1	1	1	1	1	0.875
315	2019	2019-03-12	8	Primary	PRE	Girl	1	1	0	1	1	1	1	1	0.875
316	2019	2019-03-12	8	Primary	PRE	Boy	0	1	1	1	0	1	0	1	0.625
317	2019	2019-03-12	9	Primary	PRE	Boy	1	1	1		0	1	0	0	0.5
318	2019	2019-03-12	9	Primary	PRE	Boy	1	1	1	1	1	1	1	1	1
319	2019	2019-03-12	8	Primary	PRE	Girl	0	1	0	1	0	1	1	1	0.625
320	2019	2019-03-12	8	Primary	PRE	Girl	1	1	1	1	1	1	1	1	1
321	2019	2019-03-12	9	Primary	PRE	Boy	1	0	1	1	1	0	0	1	0.625
322	2019	2019-03-12	9	Primary	PRE	Boy	1	1	0	1	1	1	0	1	0.75
323	2019	2019-03-12	9	Primary	PRE	Girl	1	1	1	1	1	1	0	1	0.875
324	2019	2019-03-12	8	Primary	PRE	Boy	1	1	1	1	1	1	0	1	0.875
325	2019	2019-03-12	9	Primary	PRE	Boy	1	1	1	1	1	1	0	1	0.875
326	2019	2019-03-12	9	Primary	PRE	Boy	1	1	1	1	1	0	0	1	0.75
327	2019	2019-03-12	8	Primary	PRE	Girl	1	1	1	1	1	1	1	1	1
328	2019	2019-03-12	8	Primary	PRE	Girl	1	0	1	1	1	1	0	1	0.75
329	2019	2019-03-12	8	Primary	PRE	Boy	1	1	0	1	1	1	1	1	0.875
330	2019	2019-03-12	8	Primary	PRE	Girl	0	1	1	1	1	1	1	1	0.875
331	2019	2019-03-12	8	Primary	PRE	Boy	1	1	1	1	1	1	0	1	0.875
332	2019	2019-03-12	9	Primary	PRE	Boy	1	1	0	1	1	1	1	1	0.875
333	2019	2019-03-14	10	Primary	PRE	Girl	1	0	0	1	0	0	0	0	0.25
334	2019	2019-03-14	10	Primary	PRE	Boy	1	0	0	1	0	0	0	0	0.25
335	2019	2019-03-14	9	Primary	PRE	Boy	1	0	0	1	1	0	0	1	0.5
336	2019	2019-03-14	9	Primary	PRE	Girl	1	0	0	1	0	0	0	0	0.25
337	2019	2019-03-14	10	Primary	PRE	Girl	1	0	1	1	0	0	0	1	0.5
338	2019	2019-03-14	9	Primary	PRE	Boy	1	1	0	1	1	1	1	1	0.875
339	2019	2019-03-14	9	Primary	PRE	Boy	1	0	1	1	0	0	0	1	0.5
340	2019	2019-03-14	10	Primary	PRE	Boy	1	0	0	1	0	0	0	0	0.25
341	2019	2019-03-14	10	Primary	PRE	Girl	1	1	0	1	0	0	1	1	0.625
342	2019	2019-03-14	9	Primary	PRE	Boy	1	1	0	1	1	0	0		0.5
343	2019	2019-03-14	9	Primary	PRE	Girl	1	1	1	1	1	0	0	1	0.75
344	2019	2019-03-14	9	Primary	PRE	Boy	1	0	1	1	0	0	0	1	0.5
345	2019	2019-03-14	9	Primary	PRE	Boy	1	1	1	1	1	1	0	1	0.875
346	2019	2019-03-14	9	Primary	PRE	Girl	1	1	1	1	1	1	0	1	0.875
347	2019	2019-03-14	9	Primary	PRE	Girl	1	0	0	1	0	0	0	1	0.375
348	2019	2019-03-14	10	Primary	PRE	Girl	1	1	1	1	1	1	0	1	0.875
349	2019	2019-03-14	9	Primary	PRE	Girl	1	1	0	0	1	0	1	1	0.625
350	2019	2019-03-14	9	Primary	PRE	Boy	1	1	1	1	0	0	0	1	0.625
351	2019	2019-03-14	9	Primary	PRE	Boy	1	0	0	1	1	0	0	1	0.5
352	2019	2019-03-14	9	Primary	PRE		1	1	1	1	1	1	0	1	0.875
353	2019	2019-03-14	9	Primary	PRE	Girl	1	1	1	1	1	1	0	1	0.875
354	2019	2019-03-14	9	Primary	PRE	Girl	1	1	1	1	1	0	1	1	0.875
355	2019	2019-03-14	9	Primary	PRE	Boy	1	1	0	1	0	1	1	0	0.625
356	2019	2019-03-14	9	Primary	PRE	Boy	1	1	0	1	1	0	1	1	0.75
357	2019	2019-03-14	9	Primary	PRE	Girl	1	1	1	1	1	0	1	1	0.875
358	2019	2019-03-14	9	Primary	PRE	Girl	1	0	1	1	1	0	1	1	0.75
359	2019	2019-03-14	9	Primary	PRE	Girl	1	0	1	1	1	0		1	0.625
360	2019	2019-03-14	9	Primary	PRE	Boy	0	1	0	1	0	0	0	0	0.25
361	2019	2019-03-14	10	Primary	PRE	Boy	0	0	0	1	0	1	1	0	0.375
362	2019	2019-03-14	9	Primary	PRE	Boy	1	0	1	1	0	0	0	1	0.5
363	2019	2019-03-14	9	Primary	PRE	Girl	1	0	1	1	1	0	0	1	0.625
364	2019	2019-03-14	9	Primary	PRE	Girl	1	1	1	1	1	0	1	0	0.75
365	2019	2019-03-14	9	Primary	PRE	Boy	1	0	1	1	1	0	0	0	0.5
366	2019	2019-03-14	9	Primary	PRE	Boy	0	0	0	1	0	0	1	0	0.25
367	2019	2019-03-14	10	Primary	PRE	Boy	1	0	1	1	1	0	0	0	0.5
368	2019	2019-03-14	9	Primary	PRE	Girl	1	1	1	1	1	1	1	1	1
369	2019	2019-03-14	9	Primary	PRE	Boy	1	1	1	1	0	1	1	1	0.875
370	2019	2019-03-14	10	Primary	PRE	Boy	1	0	1	1	1	0	0	0	0.5
371	2019	2019-03-14	9	Primary	PRE	Boy	1	0	1	1	0	1	0	1	0.625
372	2019	2019-03-14	9	Primary	PRE	Girl	1	1	1	1	0	0	0	0	0.5
373	2019	2019-03-14	9	Primary	PRE	Boy	1	0	0	1	0	0	1	0	0.375
374	2019	2019-03-14	9	Primary	PRE	Boy	0	1	0	1	1	1	0	1	0.625
375	2019	2019-03-14	10	Primary	PRE	Boy	1	0	1	1	1	0	0	1	0.625
376	2019	2019-03-14	9	Primary	PRE	Girl	1	1	0	1	0	0	0	0	0.375
377	2019	2019-03-14	9	Primary	PRE	Boy	1	0	0	1	0	0	1	1	0.5
378	2019	2019-03-14	9	Primary	PRE	Girl	1	1	0	1	1	0	0	1	0.625
379	2019	2019-03-14	10	Primary	PRE	Boy	1	1	0	1	0	0	0	1	0.5
380	2019	2019-03-14	10	Primary	PRE	Girl	1	1	1	1	0	0	0	1	0.625
381	2019	2019-03-14	9	Primary	PRE		1	0	0	1	1	1	0	1	0.625
382	2019	2019-03-14	9	Primary	PRE	Boy	1	0	1	1	1	1	1	1	0.875
383	2019	2019-03-14	9	Primary	PRE	Boy	1	0	1	0	0	1	1	0	0.5
384	2019	2019-03-21	9	Primary	PRE	Boy	1	1	0	1	1	0	1	1	0.75
385	2019	2019-03-21	9	Primary	PRE	Boy	1	0	1	1	1	1	1	1	0.875
386	2019	2019-03-21	10	Primary	PRE	Boy	1	1	1	1	1	0	1	1	0.875
387	2019	2019-03-21	10	Primary	PRE	Girl	1	1	0	1	1	1	0	1	0.75
388	2019	2019-03-21	9	Primary	PRE	Boy	1	0	1	1	1	0	1	1	0.75
389	2019	2019-03-21	10	Primary	PRE	Boy	1	1	1	1	1	1	0	1	0.875
390	2019	2019-03-21	9	Primary	PRE	Girl	1	1	0	1	1	0	1	1	0.75
391	2019	2019-03-21	10	Primary	PRE	Girl	1	1	0	1	1	1	0	1	0.75
392	2019	2019-03-21	9	Primary	PRE	Girl	0	1	0	1	0	0	0	1	0.375
393	2019	2019-03-21	9	Primary	PRE	Girl	1	1	0	1	1	0	1	1	0.75
394	2019	2019-03-21	10	Primary	PRE	Girl	1	1	1	1	1	0	1	1	0.875
395	2019	2019-03-21	10	Primary	PRE	Girl	1	1	1	1	1	1	0	1	0.875
396	2019	2019-03-21	9	Primary	PRE	Girl	1	1	1	1	1	1	1	1	1
397	2019	2019-03-21	9	Primary	PRE	Girl	0	1	0	1	0	1	1	1	0.625
398	2019	2019-03-21	9	Primary	PRE	Girl	1	1	1	1	1	1	1	1	1
399	2019	2019-03-21	10	Primary	PRE	Girl	1	1	0	1	1	0	1	1	0.75
400	2019	2019-03-21	9	Primary	PRE	Boy	1	1	0	1	1	1	0	1	0.75
401	2019	2019-03-21	11	Primary	PRE	Boy	1	0	0	1	1	1	1	1	0.75
402	2019	2019-03-21	8	Primary	PRE	Boy	1	1	1	1	1	1	1	1	1
403	2019	2019-03-21	10	Primary	PRE	Girl	1	1	1	1	1	0	1	1	0.875
404	2019	2019-03-21	9	Primary	PRE	Girl	1	1	1	1	1	1	1	1	1
405	2019	2019-03-21	8	Primary	PRE	Girl	1	1	0	1	1	1	1	1	0.875
406	2019	2019-03-21	10	Primary	PRE	Girl	1	1	1	1	1	0	1	1	0.875
407	2019	2019-03-21	10	Primary	PRE	Boy	1	0	1	0	1	1	1	0	0.625
408	2019	2019-03-21	9	Primary	PRE	Girl	1	1	1	1	1	0	1	0	0.75
409	2019	2019-03-21	9	Primary	PRE	Girl	1	1	0	1	1	1	1	1	0.875
410	2019	2019-03-21	9	Primary	PRE	Boy	1	1	1	1	1	1	1	1	1
411	2019	2019-03-21	10	Primary	PRE	Girl	1	1	0	1	0	1	0	1	0.625
412	2019	2019-04-02	8	Primary	PRE	Boy	1	0	0	1	0	1	1	1	0.625
413	2019	2019-04-02	8	Primary	PRE	Girl	1	1	0	1	1	0	0	0	0.5
414	2019	2019-04-02	8	Primary	PRE	Boy	1	1	0	1	0	1	1	1	0.75
415	2019	2019-04-02	8	Primary	PRE	Girl	1	1	1	1	1	1	1	1	1
416	2019	2019-04-02	9	Primary	PRE	Boy	1	0	0	1	1	0	1	1	0.625
417	2019	2019-04-02	8	Primary	PRE	Girl	1	1	1	1	0	1	0	1	0.75
418	2019	2019-04-02	8	Primary	PRE	Girl	1	1	0	1	0	1	1	1	0.75
419	2019	2019-04-02	8	Primary	PRE	Girl	1	0	0	1	1	1	1	1	0.75
420	2019	2019-04-02	8	Primary	PRE	Girl	1	0	0	1	0	0	0	1	0.375
421	2019	2019-04-02	8	Primary	PRE	Boy	1	1	1	1	1	0	0	1	0.75
422	2019	2019-04-02	8	Primary	PRE	Girl	1	1	1	1	0	1	1	1	0.875
423	2019	2019-04-02	9	Primary	PRE	Girl	1	1	0	1	1	1	1	1	0.875
424	2019	2019-04-02	8	Primary	PRE	Boy	1	1	1	1	1	1	1	1	1
425	2019	2019-04-02	8	Primary	PRE	Girl	1	1	1	1	0	1	1	1	0.875
426	2019	2019-04-02	8	Primary	PRE	Boy	1	1	0	1	1	1	1	1	0.875
427	2019	2019-04-02	8	Primary	PRE	Boy	1	0	0	1	0	0	1	1	0.5
428	2019	2019-04-02	8	Primary	PRE	Girl	1	0	0	1	0	0	1	1	0.5
429	2019	2019-04-02	8	Primary	PRE	Girl	1	1	0	1	0	1	1	1	0.75
430	2019	2019-04-02	8	Primary	PRE	Boy	1	1	0	1	1	1	0	0	0.625
431	2019	2019-04-02	8	Primary	PRE	Girl	1	0	0	1	1	0	0	1	0.5
432	2019	2019-04-02	9	Primary	PRE	Girl	1	1	0	1	1	1	1	1	0.875
433	2019	2019-04-02	8	Primary	PRE	Girl	1	1	1	1	0	1	1	1	0.875
434	2019	2019-04-02	8	Primary	PRE	Girl	1	1	1	1	1	0	0	1	0.75
435	2019	2019-04-02	8	Primary	PRE	Boy	1	0	1	1	0	0	0	1	0.5
436	2019	2019-04-02	8	Primary	PRE	Girl	1	0	0	1	0	1	1	1	0.625
437	2019	2019-04-02	8	Primary	PRE	Boy	1	0	1	1	1	0	0	0	0.5
438	2019	2019-04-05	9	Primary	PRE	Boy	1	0	1	1	1	1	0	1	0.75
439	2019	2019-04-05	10	Primary	PRE	Girl	1	0	1	1	1	0	1	1	0.75
440	2019	2019-04-05	9	Primary	PRE	Girl	1	0	0	1	0	0	1	0	0.375
441	2019	2019-04-05	9	Primary	PRE	Boy	1	1	1	1	1	1	0	0	0.75
442	2019	2019-04-05	10	Primary	PRE	Boy	1	1	0	1	1	1	1	1	0.875
443	2019	2019-04-05	9	Primary	PRE	Boy	1	0	0	1	1	1	1	0	0.625
444	2019	2019-04-05	9	Primary	PRE	Girl	1	0	1	1	1	1	0	1	0.75
445	2019	2019-04-05	9	Primary	PRE	Boy	1	1	0	1	1	1	0	1	0.75
446	2019	2019-04-05	9	Primary	PRE	Boy	1	1	0	1	1	0	0	0	0.5
447	2019	2019-04-05	9	Primary	PRE	Boy	1	1	1	1	1	1	1	1	1
448	2019	2019-04-05	9	Primary	PRE	Girl	1	1	0	1	1	1	1	0	0.75
449	2019	2019-04-05	9	Primary	PRE	Boy	1	1	1	1	1	0	1	1	0.875
450	2019	2019-04-05	9	Primary	PRE	Girl	1	1	1	1	1	1	1	1	1
451	2019	2019-04-05	9	Primary	PRE	Boy	1	1	1	1	1	0	0	0	0.625
452	2019	2019-04-05	9	Primary	PRE	Boy	1	1	0	1	1	0	0	0	0.5
453	2019	2019-04-05	9	Primary	PRE	Boy	1	1	1	1	1	1	1	1	1
454	2019	2019-04-05	9	Primary	PRE	Boy	1	1	1	1	1	1	0	0	0.75
455	2019	2019-04-05	10	Primary	PRE	Boy	1	0	0	1	1	0	1	1	0.625
456	2019	2019-04-05	9	Primary	PRE	Girl	1	1	0	1	1	0	0	1	0.625
457	2019	2019-04-05	9	Primary	PRE	Girl	1	1	1	1	1	1	1	1	1
458	2019	2019-04-05	9	Primary	PRE	Boy	1	0	0	1	1	0	1	1	0.625
459	2019	2019-04-05	9	Primary	PRE	Boy	1	1	1	1	1	0	0	1	0.75
460	2019	2019-04-05	10	Primary	PRE	Boy	1	0	1	1	1	1	0	0	0.625
461	2019	2019-04-05	9	Primary	PRE	Boy	1	1	1	1	1	1	0	1	0.875
462	2019	2019-04-05	9	Primary	PRE	Girl	1	1	0	1	1	0	0	1	0.625
463	2019	2019-04-05	9	Primary	PRE	Boy	1	1	1	1	1	1	0	0	0.75
464	2019	2019-04-05	10	Primary	PRE	Boy	1	0	0	1	1	0	0	0	0.375
465	2019	2019-04-05	10	Primary	PRE	Girl	1	1	1	1	1	1	0	1	0.875
466	2019	2019-04-05	9	Primary	PRE	Girl	1	1	0	1	0	1	0	1	0.625
467	2019	2019-04-05	9	Primary	PRE	Boy	1	0	1	1	1	0	0	1	0.625
468	2019	2019-04-05	9	Primary	PRE	Girl	1	1	0	1	1	1	0	1	0.75
469	2019	2019-04-05	10	Primary	PRE	Girl	1	1	1	1	1	1	0	1	0.875
470	2019	2019-04-05	9	Primary	PRE	Boy	1	0	0	1	0	0	1	1	0.5
471	2019	2019-04-05	9	Primary	PRE	Girl	1	1	0	1	1	1	1	1	0.875
472	2019	2019-04-05	9	Primary	PRE	Boy	1	0	0	1	0	1	0	1	0.5
473	2019	2019-04-05	10	Primary	PRE	Girl	1	1	1	1	1	0	1	1	0.875
474	2019	2019-04-05	9	Primary	PRE	Boy	1	0	0	1	0	0	0	0	0.25
475	2019	2019-04-05	9	Primary	PRE	Girl	1	1	1	1	1	1	0	0	0.75
476	2019	2019-04-05	9	Primary	PRE	Girl	1	0	1	1	1	0	0	1	0.625
477	2019	2019-04-05	9	Primary	PRE	Girl	1	0	0	1	1		0	1	0.5
478	2019	2019-04-05	10	Primary	PRE	Girl	1	1	0	1	1	1	0	1	0.75
479	2019	2019-04-05	10	Primary	PRE	Boy	1	0	1	1	0	1	1	0	0.625
480	2019	2019-04-05	9	Primary	PRE	Boy	1	0	0	1	0	1	1	0	0.5
481	2019	2019-04-05	9	Primary	PRE	Girl	1	1	1	1	1	0	1	1	0.875
482	2019	2019-04-05	9	Primary	PRE	Girl	1	0	0	1	1	0	1	1	0.625
483	2019	2019-04-05	10	Primary	PRE	Girl	0	1	0	1	1	1	1	1	0.75
484	2019	2019-04-08	12	Secondary	PRE	Girl	1	0	0	1	1	0	0	1	0.5
485	2019	2019-04-08	12	Secondary	PRE	Boy	1	1	1	1	1	0	1	1	0.875
486	2019	2019-04-08	12	Secondary	PRE	Boy	1	1	1	1	1	1	0	1	0.875
487	2019	2019-04-08	13	Secondary	PRE	Girl	1	1	1	1	1	1	0	1	0.875
488	2019	2019-04-08	12	Secondary	PRE	Boy	1	1	1	1	1	1	0	1	0.875
489	2019	2019-04-08	12	Secondary	PRE	Boy	1	1	1	1	1	1	0	1	0.875
490	2019	2019-05-03	13	Secondary	PRE	Girl	1	1	1	1	1	1	1	1	1
491	2019	2019-04-08	13	Secondary	PRE	Boy	1	1	1	1	1	1	0	1	0.875
492	2019	2019-04-08	13	Secondary	PRE	Girl	1	1	0	1	1	0	0	1	0.625
493	2019	2019-04-08	12	Secondary	PRE	Boy	1	1	1	1	1	1	0	1	0.875
494	2019	2019-04-08	13	Secondary	PRE	Boy	1	1	1	1	1	1	1	1	1
495	2019	2019-04-08	12	Secondary	PRE	Boy	1	0	0	1	1	0	0	1	0.5
496	2019	2019-04-08	12	Secondary	PRE	Girl	1	1	1	1	1	1	1	1	1
497	2019	2019-04-08	12	Secondary	PRE	Girl	1	1	1	1	1	1	1	1	1
498	2019	2019-04-08	12	Secondary	PRE	Girl	1	1	0	1	1	1	1	1	0.875
499	2019	2019-04-08	12	Secondary	PRE	Girl	1	1	1	1	1	1	1	1	1
500	2019	2019-04-08	13	Secondary	PRE	Girl	1	1	1	1	1	1	1	1	1
501	2019	2019-04-08	13	Secondary	PRE	Girl	1	0	1	1	1	0	0	1	0.625
502	2019	2019-04-08	13	Secondary	PRE	Girl	1	1	0	1	1	1	1	1	0.875
503	2019	2019-04-08	16	Secondary	PRE	Boy	1	1	1	1	1	0	0	0	0.625
504	2019	2019-04-08	15	Secondary	PRE	Girl	1	1	1	1	1	1	1	1	1
505	2019	2019-04-08	13	Secondary	PRE	Girl	1	1	1	1	1	1	0	1	0.875
506	2019	2019-04-08	16	Secondary	PRE	Girl	0	0	1	1	1	0	0	1	0.5
507	2019	2019-04-08	15	Secondary	PRE	Girl	1	0	1	1	1	0	0	1	0.625
508	2019	2019-04-08	15	Secondary	PRE	Girl	1	1	0	1	1	1	0	1	0.75
509	2019	2019-04-08	14	Secondary	PRE	Girl	1	1	0	1	1	1	0	0	0.625
510	2019	2019-04-08	15	Secondary	PRE	Girl	0	1	0	1	1	1	1	1	0.75
511	2019	2019-04-08	15	Secondary	PRE	Girl	1	1	1	1	1	0	0	1	0.75
512	2019	2019-04-08	14	Secondary	PRE	Boy	1	0	1	1	1	0	0	1	0.625
513	2019	2019-04-08	15	Secondary	PRE	Girl	1	1	1	1	0	1	0	1	0.75
514	2019	2019-04-08	15	Secondary	PRE	Girl	1	1	1	1	0	1	0	1	0.75
515	2019	2019-04-08	13	Secondary	PRE	Girl	1	1	1	1	1	1	0	1	0.875
516	2019	2019-04-08	15	Secondary	PRE	Girl	1	0	1	1	1	0	0	1	0.625
517	2019	2019-04-08	13	Secondary	PRE	Girl	1	1	0	1	1	1	1	1	0.875
518	2019	2019-04-08	13	Secondary	PRE	Boy	1	1	0	1	0	1	0	1	0.625
519	2019	2019-04-08	13	Secondary	PRE	Girl	1	1	1	1	1	1	0	1	0.875
520	2019	2019-04-10	17	Baccalaureate	PRE	Girl	1	1	1	1	1	0	1	1	0.875
521	2019	2019-04-10	16	Baccalaureate	PRE	Girl	1	0	0	1	1	0	0	1	0.5
522	2019	2019-04-10	16	Baccalaureate	PRE	Boy	0	1	0	1	0	0	0	1	0.375
523	2019	2019-04-10	16	Baccalaureate	PRE	Boy	1	1	1	1	0	0	0	0	0.5
524	2019	2019-04-10	17	Baccalaureate	PRE	Girl	0	0	0	1	0	0	0	1	0.25
525	2019	2019-04-10	17	Baccalaureate	PRE	Boy	1	1	1	1	1	1	0	1	0.875
526	2019	2019-04-10	17	Baccalaureate	PRE	Girl	1	0	0	1	1	0	1	1	0.625
527	2019	2019-04-10	17	Baccalaureate	PRE	Boy	0	1	0	1	0	1	1	1	0.625
528	2019	2019-04-10	17	Baccalaureate	PRE	Girl	1	0	0	1	1	0	0	1	0.5
529	2019	2019-04-10	17	Baccalaureate	PRE	Girl	1	1	1	1	0	0	0	1	0.625
530	2019	2019-04-10	18	Baccalaureate	PRE	Girl	1	1	1	1	1	1	1	1	1
531	2019	2019-04-10	17	Baccalaureate	PRE	Girl	1	1	1	1	0	0	0	1	0.625
532	2019	2019-04-10	16	Baccalaureate	PRE	Girl	1	1	0	1	1	0	1	1	0.75
533	2019	2019-04-10	17	Baccalaureate	PRE	Girl	1	1	1	1	1	1	0	1	0.875
534	2019	2019-04-10	16	Baccalaureate	PRE	Girl	1	1	1	1	1	1	0	1	0.875
535	2019	2019-04-10	16	Baccalaureate	PRE	Girl	1	1	1	1	1	1	0	1	0.875
536	2019	2019-04-10	17	Baccalaureate	PRE	Girl	1	1	1	1	1	1	0	1	0.875
537	2019	2019-04-10	17	Baccalaureate	PRE	Girl	1	1	1	1	1	1	0	1	0.875
538	2019	2019-04-10	17	Baccalaureate	PRE	Girl	1	1	1	1	1	1	0	0	0.75
539	2019	2019-04-10	16	Baccalaureate	PRE	Girl	1	1	1	1	1	1	0	1	0.875
540	2019	2019-04-10	17	Baccalaureate	PRE	Girl	1	1	1	1	1	1	1	1	1
541	2019	2019-04-30	9	Primary	PRE	Boy	0	1	1	1	1	1	1	1	0.875
542	2019	2019-04-30	9	Primary	PRE	Girl	1	1	0	1	1	1	1	1	0.875
543	2019	2019-04-30	9	Primary	PRE	Girl	1	0	1	1	1	0	1	1	0.75
544	2019	2019-04-30	9	Primary	PRE	Girl	1	1	1	1	1	1	1	1	1
545	2019	2019-04-30	9	Primary	PRE	Girl	1	1	1	1	1	1	1	1	1
546	2019	2019-04-30	8	Primary	PRE	Boy	1	1	0	1	0	1	1	1	0.75
547	2019	2019-04-30	8	Primary	PRE	Girl	1	1	1	1	1	1	1	1	1
548	2019	2019-04-30	8	Primary	PRE	Girl	1	1	1	1	1	1	1	1	1
549	2019	2019-04-30	8	Primary	PRE	Boy	1	1	1	1	1	0	1	1	0.875
550	2019	2019-04-30	8	Primary	PRE	Girl	1	1	0	1	1	0	1	1	0.75
551	2019	2019-04-30	8	Primary	PRE	Girl	0	0	1	1	1	0	0	0	0.375
552	2019	2019-04-30	9	Primary	PRE	Girl	1	1	1	1	1	1	1	1	1
553	2019	2019-04-30	8	Primary	PRE	Girl	1	1	1	1	1	1	1	1	1
554	2019	2019-04-30	8	Primary	PRE	Girl	1	0	0	1	1	0	0	1	0.5
555	2019	2019-04-30	8	Primary	PRE	Boy	1	1	0	1	1	1	0	0	0.625
556	2019	2019-04-30	9	Primary	PRE	Girl	1	1	1	1	1	1	1	1	1
557	2019	2019-04-30	8	Primary	PRE	Boy	0	1	0	1	0	0	1	1	0.5
558	2019	2019-04-30	8	Primary	PRE	Boy	0	1	1	1	1	0	0	1	0.625
559	2019	2019-04-25	13	Secondary	PRE	Girl	1	1	1	1	1	1	0	1	0.875
560	2019	2019-04-25	13	Secondary	PRE	Boy	1	0	0	1	1	0	1	1	0.625
561	2019	2019-04-25	12	Secondary	PRE	Boy	1	1	1	1	1	1	0	1	0.875
562	2019	2019-04-25	13	Secondary	PRE	Boy	1	1	0	1	1	1	0	1	0.75
563	2019	2019-04-25	12	Secondary	PRE	Boy	1	1	1	1	1	1	1	1	1
564	2019	2019-04-25	12	Secondary	PRE	Boy	1	1	1	1	1	1	1	1	1
565	2019	2019-04-25	13	Secondary	PRE		1	1	0	1	1	1	0	1	0.75
566	2019	2019-04-25	12	Secondary	PRE	Girl	1	1	1	1	1	1	1	1	1
567	2019	2019-04-25	13	Secondary	PRE	Boy	1	1	0	1	1	1	0	1	0.75
568	2019	2019-04-25	12	Secondary	PRE	Girl	1	1	1	1	1	1	0	1	0.875
569	2019	2019-04-25	12	Secondary	PRE		0	0	1	1	1	0	0	1	0.5
570	2019	2019-04-25	12	Secondary	PRE	Boy	0	0	1	1	1	0	0	1	0.5
571	2019	2019-04-25	12	Secondary	PRE	Boy	1	1	1	1	1	1	0	1	0.875
572	2019	2019-04-25	13	Secondary	PRE	Girl	1	1	0	1	1	0	1	1	0.75
573	2019	2019-04-25	13	Secondary	PRE	Boy	0	0	1	1	1	0	0	1	0.5
574	2019	2019-04-25	13	Secondary	PRE		1	0	1	1	1	0	0	1	0.625
575	2019	2019-04-25	13	Secondary	PRE	Boy	1	1	1	1	1	1	0	1	0.875
576	2019	2019-04-25	13	Secondary	PRE	Boy	1	0	1	1	1	0	0	1	0.625
577	2019	2019-04-25	13	Secondary	PRE	Boy	1	1	0	1	1	1	0	1	0.75
578	2019	2019-04-25	13	Secondary	PRE	Boy	1	1	1	1	1	1	0	1	0.875
579	2019	2019-04-25	14	Secondary	PRE	Boy	1	1	1	1	0	0	1	0	0.625
580	2019	2019-04-25	12	Secondary	PRE	Girl		1	1	1	0	1	0	1	0.625
581	2019	2019-04-25	12	Secondary	PRE	Girl		1	0	1		1	0	1	0.5
582	2019	2019-04-25	12	Secondary	PRE	Boy	0	1	1	1	1	0	0	1	0.625
583	2019	2019-04-25	13	Secondary	PRE	Boy	1	1	1	1	1	0	0	1	0.75
584	2019	2019-04-25	13	Secondary	PRE	Girl	0	1	0	1	1	0	0	1	0.5
585	2019	2019-04-26	12	Secondary	PRE	Girl	1	0	0	1	0	0	1	1	0.5
586	2019	2019-04-25	12	Secondary	PRE	Boy	1	1	1	1	1	1	0	1	0.875
587	2019	2019-04-25	13	Secondary	PRE	Girl	0	1	1	1	1	1	0	1	0.75
588	2019	2019-04-25	12	Secondary	PRE	Boy	1	1	0	1	1	1	0	1	0.75
589	2019	2019-04-25	13	Secondary	PRE	Boy	1	1	0	1	1	0	1	1	0.75
590	2019	2019-04-25	12	Secondary	PRE	Boy	1	1	1	1	1	1	0	1	0.875
591	2019	2019-04-25	13	Secondary	PRE	Boy	1	1	0	1	1	1	0	1	0.75
592	2019	2019-04-25	12	Secondary	PRE	Boy	1	1	0	1	1	0	0	1	0.625
593	2019	2019-04-25	12	Secondary	PRE	Boy	1	1	1	1	1	1	0	0	0.75
594	2019	2019-04-25	13	Secondary	PRE	Boy		1	1	1	1	1	0	1	0.75
595	2019	2019-04-25	13	Secondary	PRE	Boy	1	1	0	1	1	1	1	1	0.875
596	2019	2019-04-25	13	Secondary	PRE	Boy	1	0	1	1	1	0	0	1	0.625
597	2019	2019-04-25	12	Secondary	PRE	Girl	1	0	0	1	1	0	0	1	0.5
598	2019	2019-04-25	12	Secondary	PRE	Girl	1	0	0	1	1	0	0	1	0.5
599	2019	2019-04-25	12	Secondary	PRE	Boy	1	1	0	1	1	1	0	1	0.75
600	2019	2019-04-16	17	Secondary	PRE	Girl	1	1		1	1	1			0.625
601	2019	2019-04-25	12	Secondary	PRE	Girl	1	1	1	1	1	0	1	1	0.875
602	2019	2019-04-25	12	Secondary	PRE	Boy	1	1	1	1	1	1	0	1	0.875
603	2019	2019-04-25	12	Secondary	PRE	Boy	1	1	0	1	1	1	1	1	0.875
604	2019	2019-04-25	13	Secondary	PRE	Girl	1	0	0	1	1	0	1	1	0.625
605	2019	2019-04-25	12	Secondary	PRE	Girl	0	1	0	1	1	0	0	1	0.5
606	2019	2019-04-25	12	Secondary	PRE	Boy	1	1	1	1	1	1	0	0	0.75
607	2019	2019-04-25	12	Secondary	PRE	Boy	1	1	1	1	1	1	0	1	0.875
608	2019	2019-04-25	12	Secondary	PRE	Boy	1	1	1	1	1	0	0	1	0.75
609	2019	2019-04-25	12	Secondary	PRE	Boy		1	0	1		1	0	1	0.5
610	2019	2019-04-25	12	Secondary	PRE	Boy	1	1	1	1	1	0	0	1	0.75
611	2019	2019-04-26	12	Secondary	PRE	Boy	1	0	1	1	1	0	0	0	0.5
612	2019	2019-04-26	13	Secondary	PRE	Girl	0	1	1	1	1	1	1	1	0.875
613	2019	2019-04-26	12	Secondary	PRE	Boy	1	1	0	1	0	1	0	1	0.625
614	2019	2019-04-26	13	Secondary	PRE	Boy	1	1	1	1	1	1	0	1	0.875
615	2019	2019-04-26	12	Secondary	PRE	Boy	1	1	0	1	1	1	0	1	0.75
616	2019	2019-04-26	13	Secondary	PRE	Girl	1	1	0	1	1	1	1	1	0.875
617	2019	2019-04-26	12	Secondary	PRE	Boy	1	1	0	1	1	1	0	1	0.75
618	2019	2019-04-26	12	Secondary	PRE	Boy	1	0	0	1	1	0	0	1	0.5
619	2019	2019-04-26	13	Secondary	PRE	Girl	1	1	1	1	1	1	0	0	0.75
620	2019	2019-04-26	13	Secondary	PRE	Girl	1	1	1	1	1	0	0	0	0.625
621	2019	2019-04-26	12	Secondary	PRE	Boy	1	1	1	1	1	0	0	0	0.625
622	2019	2019-04-26	13	Secondary	PRE	Girl	1	1	1	1	1	1	1	1	1
623	2019	2019-04-26	13	Secondary	PRE	Boy	1	1	1	1	1	1	1	0	0.875
624	2019	2019-04-26	14	Secondary	PRE	Boy	1	1	0	1	1	1		0	0.625
625	2019	2019-04-26	12	Secondary	PRE	Boy	1	1	1	1	1	1	1	0	0.875
626	2019	2019-04-26	12	Secondary	PRE	Girl	1	1	1	1	1	1	0	1	0.875
627	2019	2019-04-26	12	Secondary	PRE	Boy	1	0	1	1	1	1	1	0	0.75
628	2019	2019-04-26	13	Secondary	PRE	Boy	1	1	0	1	1	1	0	0	0.625
629	2019	2019-04-25	13	Secondary	PRE	Girl	1	0	1	1	1	0	1	1	0.75
630	2019	2019-04-26	13	Secondary	PRE	Girl	1	0	0	0	1	0	0	1	0.375
631	2019	2019-04-26	13	Secondary	PRE	Boy	1	1	1	1	1	0	1	0	0.75
632	2019	2019-04-26	13	Secondary	PRE	Girl	1	1	0	1	1	1	1	1	0.875
633	2019	2019-04-26	13	Secondary	PRE	Boy	1	1	1	1	1	0	1	1	0.875
634	2019	2019-04-26	12	Secondary	PRE	Girl	1	1	0	1	1	1	0	1	0.75
635	2019	2019-04-26	13	Secondary	PRE	Girl	1	1	0	1	0	1	0	0	0.5
636	2019	2019-04-26	13	Secondary	PRE	Girl	0	1	1	1	1	1	0	0	0.625
637	2019	2019-04-26	13	Secondary	PRE	Girl	0	1	1	1	1	1	0	0	0.625
638	2019	2019-04-26	12	Secondary	PRE	Boy	1	0	1	1	1	0	0	1	0.625
639	2019	2019-04-26	13	Secondary	PRE	Girl	1	1	1	1	1	1	0	1	0.875
640	2019	2019-04-26	12	Secondary	PRE	Boy	1	1	1	1	1	0	0	1	0.75
641	2019	2019-04-26	13	Secondary	PRE	Girl	0	0	1	1	1	1	0	0	0.5
642	2019	2019-04-26	13	Secondary	PRE	Boy	0	0	1	1	1	0	1	0	0.5
643	2019	2019-04-26	12	Secondary	PRE	Boy	1	1	0	1	1	1	0	0	0.625
644	2019	2019-04-26	12	Secondary	PRE	Girl	1	1	1	1	1	1	0	1	0.875
645	2019	2019-04-26	14	Secondary	PRE	Boy	1	1	1	1	1	1	1	1	1
646	2019	2019-04-26	12	Secondary	PRE	Girl	1	1	0	1	1	1	0	1	0.75
647	2019	2019-04-26	12	Secondary	PRE	Girl	1	1	1	1	1	1	0	0	0.75
648	2019	2019-04-26	13	Secondary	PRE	Boy	0	1	0	1	1	0	0	1	0.5
649	2019	2019-04-26	13	Secondary	PRE	Boy	1	1	1	1	1	1	1	1	1
650	2019	2019-04-26	13	Secondary	PRE	Boy	1	1	1	1	1	0	0	1	0.75
651	2019	2019-04-26	13	Secondary	PRE	Boy	1	1	0	1	1	1	0	1	0.75
652	2019	2019-04-26	12	Secondary	PRE	Boy	1	1	0	1	1	1	0	1	0.75
653	2019	2019-04-26	12	Secondary	PRE	Girl	1	1	1	1	1	0	0	1	0.75
654	2019	2019-04-24	9		PRE	Boy	1	1	1	1	1	1	0	1	0.875
655	2019	2019-04-24	8		PRE	Boy	1	1	1	1		1	1	1	0.875
656	2019	2019-04-24	9		PRE	Boy	1	1	0	1	0	0	0	1	0.5
657	2019	2019-04-24	9		PRE	Girl	1	1	1	1	1	1	0	1	0.875
658	2019	2019-04-24	9		PRE	Boy	1	1	1	1	1	0	0	1	0.75
659	2019	2019-04-24	9		PRE	Girl	1	0	1	1	1		0	1	0.625
660	2019	2019-04-24	9		PRE	Boy	1	1	0	1	1	1	0	1	0.75
661	2019	2019-04-24	8		PRE	Girl	0	0	1	1	1		1	1	0.625
662	2019	2019-04-24	8		PRE	Girl	1	1	1	1	1	1	0	1	0.875
663	2019	2019-04-24	9		PRE	Boy	1	1	1	1	1	1	0	1	0.875
664	2019	2019-04-24	9		PRE	Girl	1	1	0	1	1	1	0	1	0.75
665	2019	2019-04-24	10		PRE	Boy	1	1	0	1	0	1	1	1	0.75
666	2019	2019-04-24	9		PRE	Girl	1	0	0	1	1	0	1	1	0.625
667	2019	2019-04-24	10		PRE	Boy	1	0	1	1	1	0	0	1	0.625
668	2019	2019-04-24	10		PRE	Boy	1	0	0	1	1	0	0	0	0.375
669	2019	2019-04-24	9		PRE	Boy	1	1	1	1	1	1	1	1	1
670	2019	2019-04-24	9		PRE	Girl	1	1		1	1	1	0	1	0.75
671	2019	2019-04-24	9		PRE	Boy	1	1	0	1	1	1	0	1	0.75
672	2019	2019-04-24	8		PRE	Girl	1	1	0	1	1	1	1	1	0.875
673	2019	2019-04-24	8		PRE	Boy	1	1	1	1	1	0	0	0	0.625
674	2019	2019-04-24	10		PRE	Boy	1	0	1	1	1	0	0	1	0.625
675	2019	2019-04-24	9		PRE	Girl	1	0	1	1	0	0	0	0	0.375
676	2019	2019-04-24	9		PRE	Boy	1	1	1	1	1	1	1	1	1
677	2019	2019-04-24	8		PRE	Girl	1	0	1	1	0	1	0	0	0.5
678	2019	2019-04-24	10		PRE	Girl	1	1	1	1	1	1	0	1	0.875
679	2019	2019-04-24	9		PRE	Girl	1	1	1	1	1	1	0	1	0.875
680	2019	2019-04-24	9		PRE	Boy	0	1	0	1	1	1	1	1	0.75
681	2019	2019-04-24	9		PRE	Girl	1	1	0	1	0	0	0	1	0.5
682	2019	2019-04-24	8		PRE	Girl	1	1	0	1	1	1		1	0.75
683	2019	2019-04-24	10		PRE	Girl	1	1	0	1	1	1		1	0.75
684	2019	2019-04-24	10		PRE	Girl	1	1	0	1	1	1		1	0.75
685	2019	2019-04-24	8		PRE	Boy	0	0	1	1	1	0	0	1	0.5
686	2019	2019-04-24	8		PRE	Girl	1	1	1	1	1	0	0	1	0.75
687	2019	2019-04-24	9		PRE	Girl	1	0	1	1	1	0	1	1	0.75
688	2019	2019-04-24	10		PRE	Girl	1	0	0	1	0	1	0	1	0.5
689	2019	2019-04-24	9		PRE	Girl	1	1	1	1	0	1	0	1	0.75
690	2019	2019-04-24	9		PRE	Girl	1	0	1	1	1	0	1	1	0.75
691	2019	2019-04-24	10		PRE	Boy	1	1	1	1	1	1	1	0	0.875
692	2019	2019-04-24	10		PRE	Boy	1	1	1	1	1	1	1	0	0.875
693	2019	2019-04-24	9		PRE	Boy	1	1	0	1	1	0	1	1	0.75
694	2019	2019-04-24	9		PRE	Girl	1	0	1	1	1	0	1	1	0.75
695	2019	2019-04-24	9		PRE	Girl	1	0	1	1	1	0	1	1	0.75
696	2019	2019-04-24	8		PRE	Boy	1	1	0	1	1	1	1	1	0.875
697	2019	2019-04-24	9		PRE	Boy	1	1	0	1	1	0	0	1	0.625
698	2019	2019-04-24	8		PRE	Boy	0	1	1	1	1	0	1	0	0.625
699	2019	2019-04-24	9		PRE	Boy	1	0	1	1	1	0	1	0	0.625
700	2019	2019-04-24	8		PRE	Girl	1	1	1	1	1	1	0	1	0.875
701	2019	2019-04-24	9		PRE	Girl	0	1	0	1	1	0	0	1	0.5
702	2019	2019-04-24	10		PRE	Boy	1	0	1	1	0	0	0	0	0.375
703	2019	2019-04-24	9		PRE	Boy	1	1	1	1	1	1	0	1	0.875
704	2019	2019-04-24	9		PRE	Girl	1	1	1	1	1	0	0	1	0.75
705	2019	2019-04-24	9		PRE	Girl	1	1	1	1	1	0	0	1	0.75
706	2019	2019-04-24	9		PRE	Boy	0	0	1	1	1	0		1	0.5
707	2019	2019-04-24	9		PRE	Girl	1	0	1	1	1	0	1	1	0.75
708	2019	2019-05-07	14	Secondary	PRE		1	1	1	1	1	1	0	1	0.875
709	2019	2019-05-07	14	Secondary	PRE	Boy	1	1	1	1	1	1	0	1	0.875
710	2019	2019-05-07	14	Secondary	PRE	Girl	1	1	1	1	1	1	0	1	0.875
711	2019	2019-05-07	14	Secondary	PRE	Boy	1	0	0	1		0	0	0	0.25
712	2019	2019-05-07	14	Secondary	PRE	Girl	1	1	1	1	1	1	0	1	0.875
713	2019	2019-05-07	15	Secondary	PRE	Girl	0	0	1	1	1	1	0	1	0.625
714	2019	2019-05-07	14	Secondary	PRE	Girl	1	1	1	1	1	1	0	1	0.875
715	2019	2019-05-07	14	Secondary	PRE	Girl	1	1	1	1	1	1	0	1	0.875
716	2019	2019-05-07	15	Secondary	PRE	Boy	1	1	1	1	1	1	0	1	0.875
717	2019	2019-05-07	14	Secondary	PRE	Boy	1	1	1	1	1	1	0	1	0.875
718	2019	2019-05-07	15	Secondary	PRE	Girl	1	1	1	1	1	1	0	1	0.875
719	2019	2019-05-07	14	Secondary	PRE	Boy	1	0	1	1	1	0	0	1	0.625
720	2019	2019-05-07	15	Secondary	PRE	Boy	1	1	1	1	1	1	0	1	0.875
721	2019	2019-05-07	14	Secondary	PRE	Boy	1	1	1	1	0	1	0	0	0.625
722	2019	2019-05-07	14	Secondary	PRE	Boy	1	1	1	1	1	1		1	0.875
723	2019	2019-05-07	15	Secondary	PRE	Girl	1	1	1	1	1	1	0	0	0.75
724	2019	2019-05-07	14	Secondary	PRE	Girl	1	1	1	1	1	1	1	1	1
725	2019	2019-05-07	15	Secondary	PRE	Girl	1	1	1	1	1	0	0	1	0.75
726	2019	2019-05-07	14	Secondary	PRE	Girl	1	1	1	1	1	1	0	1	0.875
727	2019	2019-05-08	13	Secondary	PRE	Boy	1	1	0	1	1	1	0	1	0.75
728	2019	2019-05-08	12	Secondary	PRE	Girl	1	1	1	1	1	1	0	1	0.875
729	2019	2019-05-08	13	Secondary	PRE	Boy	0	0	0	1	1	0	1	1	0.5
730	2019	2019-05-08	12	Secondary	PRE	Boy	0	0	0	1	1	0	0	0	0.25
731	2019	2019-05-08	13	Secondary	PRE	Boy	1	0	0	1	0	0	0	0	0.25
732	2019	2019-05-08	12	Secondary	PRE	Girl	0	1	1	1	1	0	0	0	0.5
733	2019	2019-05-08	12	Secondary	PRE	Girl	1	1	0	1	1	0	0	1	0.625
734	2019	2019-05-08	13	Secondary	PRE	Girl	1	1	0	1	1	1	0	1	0.75
735	2019	2019-05-08	13	Secondary	PRE	Girl	1	1	1	1	1	1	1	1	1
736	2019	2019-05-08	12	Secondary	PRE	Boy	1	1	0	1	1		1	0	0.625
737	2019	2019-05-08	12	Secondary	PRE	Girl	1	1	0	1	1	1	0	1	0.75
738	2019	2019-05-08	13	Secondary	PRE	Boy	1	1	0	1	1	1	0	1	0.75
739	2019	2019-05-08	12	Secondary	PRE	Boy	0	0	1	1	1	0	0	0	0.375
740	2019	2019-05-08	14	Secondary	PRE	Boy	0	0	1	0	1	0	0	1	0.375
741	2019	2019-05-08	13	Secondary	PRE	Boy	1	0	0	1	1	0	0	1	0.5
742	2019	2019-05-08	12	Secondary	PRE	Girl	1	0	0	1	1	0	0	1	0.5
743	2019	2019-05-08	12	Secondary	PRE	Girl	1	0	0	1	1	0	0	1	0.5
744	2019	2019-05-08	12	Secondary	PRE	Boy	0	0	1	1	1	1	0	0	0.5
745	2019	2019-05-08	12	Secondary	PRE	Girl	1	0	0	1	1	0	0	1	0.5
746	2019	2019-05-08	12	Secondary	PRE	Girl	1	1	1	1	1	1	0	1	0.875
747	2019	2019-05-08	13	Secondary	PRE	Boy	1	1	0	1	1	1	0	1	0.75
748	2019	2019-05-08	12	Secondary	PRE	Girl	1	1	1	1	1	1	0	1	0.875
749	2019	2019-05-08	13	Secondary	PRE	Girl	1	1	1	1	1	1	0	0	0.75
750	2019	2019-05-08	13	Secondary	PRE	Boy	1	0	1	1	1	1	1	1	0.875
751	2019	2019-05-08	13	Secondary	PRE	Girl	1	1	1	1	1		1	1	0.875
752	2019	2019-05-08	12	Secondary	PRE	Boy	1	1	0	1	1	1	0	1	0.75
753	2019	2019-05-08	12	Secondary	PRE	Boy	1	1	0	1	1	1	0	1	0.75
754	2019	2019-05-14	11	Primary	PRE	Boy	1	0	1	1	1	1	0	0	0.625
755	2019	2019-05-14	11	Primary	PRE	Girl	1	1	1	1	1	0	1	1	0.875
756	2019	2019-05-14	11	Primary	PRE	Boy	1	0	0	1	0	0	0	1	0.375
757	2019	2019-05-14	11	Primary	PRE	Girl	1	0	1	1	1	0	0	1	0.625
758	2019	2019-05-14	12	Primary	PRE	Girl	1	0	1	1	1	1	1	1	0.875
759	2019	2019-05-14	11	Primary	PRE	Boy	1	1	1	1	1	0	0	1	0.75
760	2019	2019-05-14	11	Primary	PRE	Boy	1	0	1	1	1	0	0	1	0.625
761	2019	2019-05-14	11	Primary	PRE	Girl	1	1	0	1	1	1	0	1	0.75
762	2019	2019-05-14	11	Primary	PRE	Girl	1	1	1	1	1	0	0	1	0.75
763	2019	2019-05-14	11	Primary	PRE	Girl	1	1	1	1	1	1	0	1	0.875
764	2019	2019-05-14	13	Primary	PRE	Girl	1	1	1	1	1	0	1	1	0.875
765	2019	2019-05-14	12	Primary	PRE	Girl	1	1	0	1	1	1	0	1	0.75
766	2019	2019-05-14	11	Primary	PRE	Boy	1	0	0	1	1	1	1	0	0.625
767	2019	2019-05-14	12	Primary	PRE	Girl	1	1	0	1	1	1	1	1	0.875
768	2019	2019-05-14	11	Primary	PRE	Girl	1	1	1	1	1	0	1	1	0.875
769	2019	2019-05-14	11	Primary	PRE	Boy	1	1	1	1	1	0	0	1	0.75
770	2019	2019-05-14	11	Primary	PRE	Boy	1	1	1	1	1	0	1	0	0.75
771	2019	2019-05-14	11	Primary	PRE	Boy	1	0	1	1	1	0	0	1	0.625
772	2019	2019-05-14	10	Primary	PRE	Girl	1	1	1	1	1	1	1	1	1
773	2019	2019-05-14	10	Primary	PRE	Girl	1	1	1	1	1	1	1	1	1
774	2019	2019-05-14	11	Primary	PRE	Boy	1	1	1	1	1	1	1	1	1
775	2019	2019-05-14	11	Primary	PRE	Boy	1	1	1	1	1	1	1	1	1
776	2019	2019-05-14	11	Primary	PRE	Boy	1	1	1	1	1	1	1	1	1
777	2019	2019-05-13	13	Secondary	PRE	Girl	1	1	0	1	1	1	0	1	0.75
778	2019	2019-05-13	13	Secondary	PRE	Girl	1	1	0	1		1	0	1	0.625
779	2019	2019-05-13	13	Secondary	PRE	Boy	1	0	1	1	1	0	0	0	0.5
780	2019	2019-05-13	12	Secondary	PRE	Boy	1	0	1	1	1	0	0	1	0.625
781	2019	2019-05-13	12	Secondary	PRE	Boy	1	0	0	1	1	1	0	1	0.625
782	2019	2019-05-13	12	Secondary	PRE	Boy	1	1	0	1	1	1	0	0	0.625
783	2019	2019-05-13	13	Secondary	PRE	Boy	1	1	1	1	1	0	1	1	0.875
784	2019	2019-05-13	12	Secondary	PRE	Boy	1	0	1	1	1	1	0	1	0.75
785	2019	2019-05-13	12	Secondary	PRE	Girl	1	0	0	1	1	0	0	1	0.5
786	2019	2019-05-13	11	Secondary	PRE	Boy	1	1	0	1	1	0	0		0.5
787	2019	2019-05-13	13	Secondary	PRE	Girl	1	1	0	1	1	1	0	1	0.75
788	2019	2019-05-13	12	Secondary	PRE	Girl	1	1	0	1	1	0	0	1	0.625
789	2019	2019-05-13	12	Secondary	PRE	Boy	1		0	1	0	0			0.25
790	2019	2019-05-13	13	Secondary	PRE	Girl	1	1	0	1	1	0	0	1	0.625
791	2019	2019-05-13	12	Secondary	PRE	Boy	1	0	1		1	0	0	1	0.5
792	2019	2019-05-13	12	Secondary	PRE	Boy	1	1	0	1	1	1	1	1	0.875
793	2019	2019-06-13	14	Secondary	PRE	Girl	1	1	0	1	0	1	1	1	0.75
794	2019	2019-06-13	15	Secondary	PRE	Boy	1	1		1	1	1	1	1	0.875
795	2019	2019-06-13	14	Secondary	PRE	Boy	1	1	1	1	1	1	1	1	1
796	2019	2019-06-13	15	Secondary	PRE	Boy	0	0	1	1	1	0	0		0.375
797	2019	2019-06-13	15	Secondary	PRE		1	1	0	1	1	1	1	1	0.875
798	2019	2019-06-13	15	Secondary	PRE	Boy	0	1	1	1	1	1		0	0.625
799	2019	2019-06-13	15	Secondary	PRE	Girl	1	1	0	1	1	1	1	1	0.875
800	2019	2019-06-13	16	Secondary	PRE	Boy	1	1	1	1	1	1	1	1	1
801	2019	2019-06-13	14	Secondary	PRE	Boy	1	1	0	1	1	0	0	1	0.625
802	2019	2019-06-13	15	Secondary	PRE	Boy	1	1	1	1	1	1	0	1	0.875
803	2019	2019-06-13	14	Secondary	PRE	Girl	0	0	1	1	1	0	1	1	0.625
804	2019	2019-06-13	15	Secondary	PRE	Boy	1	1	0	1	1	1	1	1	0.875
805	2019	2019-06-13	15	Secondary	PRE	Girl	1	0	0	1	1	0	0	1	0.5
806	2019	2019-06-13	14	Secondary	PRE	Girl	1	1	0	1	1	1	1	1	0.875
807	2019	2019-06-13	14	Secondary	PRE	Girl	1	1	1	1	1	1	0	1	0.875
808	2019	2019-06-13	14	Secondary	PRE	Girl	1	0	1	1	1	0	1	1	0.75
809	2019	2019-06-13	14	Secondary	PRE	Girl	1	0	0	1	1	0	0	1	0.5
810	2019	2019-06-13	14	Secondary	PRE	Girl	1	1	1	1	1	1	1	1	1
811	2019	2019-06-13	14	Secondary	PRE	Boy	1	1	1	1	1	1	1	1	1
812	2019	2019-06-13	15	Secondary	PRE	Girl	1	1	1	1	1	1		1	0.875
813	2019	2019-06-13	15	Secondary	PRE	Girl	0	1	1	1	1	0	1	1	0.75
814	2019	2019-06-13	15	Secondary	PRE	Boy	1	0	1	1	1	0	0	1	0.625
815	2019	2019-06-13	15	Secondary	PRE	Boy	1	1	0	1	1	1	1	1	0.875
816	2019	2019-06-13	15	Secondary	PRE	Boy	1	1	1	1	1	1	0	1	0.875
817	2019	2019-06-13	14	Secondary	PRE	Boy	1	1	0	1	1	1	0	1	0.75
818	2019	2019-06-13	15	Secondary	PRE	Boy	1	1	0	1	1	1	0	1	0.75
819	2019	2019-06-13	15	Secondary	PRE	Girl	1	1	0	1	1	1	1	1	0.875
820	2019	2019-06-13	15	Secondary	PRE	Girl	1	1	1	1	1	0	0	1	0.75
821	2019	2019-06-13	15	Secondary	PRE	Girl	1	1	0	1	1	1	1	1	0.875
822	2019	2019-06-13	14	Secondary	PRE	Girl	1	1	0	1	1	1	1	1	0.875
823	2018	2018-03-19	12	Secondary	POST	Boy	1	1	1	1	1	1	1	1	1
824	2018	2018-03-19	13	Secondary	POST	Boy	0	1		0	1	0	0	1	0.375
825	2018	2018-03-19	13	Secondary	POST	Girl	1	1	1	1	1	1	1	1	1
826	2018	2018-03-19	13	Secondary	POST	Girl	1	1	1	1	1	1	1	1	1
827	2018	2018-03-19	12	Secondary	POST	Girl	1	1	1	1	1	1	1	1	1
828	2018	2018-03-19	12	Secondary	POST	Boy	1	1	0	1	0	1	1	1	0.75
829	2018	2018-03-19	12	Secondary	POST	Girl	1	0	1	1	1	0	1	1	0.75
830	2018	2018-03-19	13	Secondary	POST	Boy	1	1		0	1	1	0	1	0.625
831	2018	2018-03-19	12	Secondary	POST	Boy	1	0	0	1	1	1	1	1	0.75
832	2018	2018-03-19	12	Secondary	POST	Girl	0	1	1	1	1	1	0	1	0.75
833	2018	2018-03-19	12	Secondary	POST	Girl	1	1	1	1	1	1	1	1	1
834	2018	2018-03-19	13	Secondary	POST	Boy	1	1	1	1	1	1	1	1	1
835	2018	2018-03-19	12	Secondary	POST	Girl	0	1	1	0	0	1	0	1	0.5
836	2018	2018-03-19	13	Secondary	POST	Girl	1	1	1	1	1	1	0	1	0.875
837	2018	2018-03-19	12	Secondary	POST	Girl	0		1	1	0	1	0	1	0.5
838	2018	2018-03-19	12	Secondary	POST	Girl	1	1	0	0	0	1	0	0	0.375
839	2018	2018-03-19	12	Secondary	POST	Girl	1	1	1	1	1	1	1	1	1
840	2018	2018-03-19	13	Secondary	POST	Girl	1	1	1	1	1	1	1	1	1
841	2018	2018-03-19	12	Secondary	POST	Girl	0	0	1	1	0	1	0	1	0.5
842	2018	2018-03-21	10	Primary	POST	Boy	1	0	1	1	1	1	1	1	0.875
843	2018	2018-03-21	11	Primary	POST	Girl	1	1	1	1	1	1	1	1	1
844	2018	2018-03-21	12	Primary	POST	Girl	1	1	1	1	1	1	0	1	0.875
845	2018	2018-03-21	11	Primary	POST	Girl		1	1	1	1	1	1	1	0.875
846	2018	2018-03-21	10	Primary	POST	Girl	1	1	1	1	1	1	1	1	1
847	2018	2018-03-21	10	Primary	POST	Boy	0	0	0	1	1	1	1	1	0.625
848	2018	2018-03-21	11	Primary	POST	Girl	1	1	1	1	1	1	1	1	1
849	2018	2018-03-21	12	Primary	POST	Boy	1	1	1	1	1	1	0	1	0.875
850	2018	2018-03-21	10	Primary	POST	Girl	1	1		1	1	1	0	1	0.75
851	2018	2018-03-21	11	Primary	POST	Boy	1	1	1	1	1	1	0	1	0.875
852	2018	2018-03-21	11	Primary	POST	Girl	1	1	0	1	1	1	1	1	0.875
853	2018	2018-03-21	11	Primary	POST	Boy	1	1	1	1	1	1	0	1	0.875
854	2018	2018-03-21	11	Primary	POST	Girl	1	1	1	1	1	1	1	1	1
855	2018	2018-03-21	10	Primary	POST	Girl		0	0	1	1	1	1	1	0.625
856	2018	2018-03-21	11	Primary	POST	Girl	1	1	1	1	1	0	0	1	0.75
857	2018	2018-03-21	11	Primary	POST	Boy	1	1	1	1	1	1	0	1	0.875
858	2018	2018-03-21	10	Primary	POST	Boy	1	1	1		0	0	1	1	0.625
859	2018	2018-03-21	10	Primary	POST	Boy	0	1	0	1	1	1	1	1	0.75
860	2018	2018-03-21	11	Primary	POST	Girl	0	1	0	1	0	1	0	1	0.5
861	2018	2018-03-21	10	Primary	POST	Girl	1	1	0	1	1	1	1	1	0.875
862	2018	2018-03-21	11	Primary	POST	Boy	0	1	1	1	1	1	1	1	0.875
863	2018	2018-03-21	10	Primary	POST	Boy	1	1	1	1	1	1	0	1	0.875
864	2018	2018-03-21	10	Primary	POST	Boy	1	1	1	1	1	1	0	1	0.875
865	2018	2018-03-21	10	Primary	POST	Boy	1	1	1	1	1	1	0	1	0.875
866	2018	2018-03-21	11	Primary	POST	Girl	1	0	1	1	1	1	1	1	0.875
867	2018	2018-03-21	10	Primary	POST	Boy	1	1	0	1	1	1	0	1	0.75
868	2018	2018-03-21	10	Primary	POST	Boy	1	0	1	1	1	1	0	1	0.75
869	2018	2018-03-21	11	Primary	POST	Girl	1	1	1	1	1	1	1	1	1
870	2018	2018-04-03	17	Baccalaureate	POST	Girl	1	1	1	1	1	1	1	1	1
871	2018	2018-04-03	18	Baccalaureate	POST	Girl	1	1	1	1	1	1	1	1	1
872	2018	2018-04-03	18	Baccalaureate	POST	Girl	1	1	1	1	1	1	1	1	1
873	2018	2018-04-07	18	Baccalaureate	POST	Girl	1	1	1	1	1	1	1	1	1
874	2018	2018-04-03	18	Baccalaureate	POST	Girl	1	1	1	1	1	1	1	1	1
875	2018	2018-04-03	17	Baccalaureate	POST	Girl	1	1	1	1	1	1	1	1	1
876	2018	2018-04-03	17	Baccalaureate	POST	Girl	1	1	1	1	1	1	1	1	1
877	2018	2018-04-03	18	Baccalaureate	POST	Girl	1	1	1	1	1	1	1	1	1
878	2018	2018-04-03	17	Baccalaureate	POST	Girl	1	1	1	1	1	1	1	1	1
879	2018	2018-04-03	17	Baccalaureate	POST	Girl	1	0	1	1	1	1	0		0.625
880	2018	2018-04-03	18	Baccalaureate	POST	Boy	0	1	1	1	1	1	1	1	0.875
881	2018	2018-04-03	18	Secondary	POST	Boy	1	1	1	1	1	1	1	1	1
882	2018	2018-04-03	17	Baccalaureate	POST	Girl	1	1	1	1	1	1	1	1	1
883	2018	2018-04-03	18	Baccalaureate	POST	Girl	1	1	1	1	1	1	1	1	1
884	2019	2018-04-05	8	Primary	POST	Boy	1	1	1	1	1	1	1	1	1
885	2019	2018-04-05	8	Primary	POST	Girl	1	1	1	1	1	1	1	1	1
886	2019	2018-04-05	8	Primary	POST	Girl	1	1	1	1	1	1	1	1	1
887	2019	2018-04-05	8	Primary	POST	Boy	1		0	1	0	0	1	1	0.5
888	2019	2018-04-05	8	Primary	POST	Girl	1	1	1	1	1	1	0	1	0.875
889	2019	2018-04-05	9	Primary	POST	Girl	1	1	0	1	1	1	1	1	0.875
890	2019	2018-04-05	9	Primary	POST	Girl	1	1	0	1	1	1	1	1	0.875
891	2019	2018-04-05	8	Primary	POST	Girl	1	1	1	1	0	0	1	1	0.75
892	2019	2018-04-05	9	Primary	POST	Girl	1	1	1	1	1	0	1	1	0.875
893	2019	2018-04-05	9	Primary	POST	Girl	1	1	1		0	1	1	1	0.75
894	2019	2018-04-05	8	Primary	POST	Boy	1	1	1	1	1	1	1	1	1
895	2019	2018-04-05	8	Primary	POST	Boy	1	1	1	1	1	1	1	1	1
896	2019	2018-04-05	8	Primary	POST	Girl	1	1	1	1	1	1	1	1	1
897	2019	2018-04-05	8	Primary	POST	Boy	1	1	1	1	1	1	1	1	1
898	2019	2018-04-05	8	Primary	POST	Girl	1	1	1	1	1	1	1	1	1
899	2019	2018-04-05	8	Primary	POST	Boy	1	1	0	1	0	1	1	1	0.75
900	2019	2018-04-05	8	Primary	POST	Girl	1	1	1	1	1	1	0	1	0.875
901	2019	2018-04-05	9	Primary	POST	Girl	1	1	1	1	1	1	1	1	1
902	2019	2018-04-05	9	Primary	POST	Boy	1	1	1	1	1	1	1	1	1
903	2019	2018-04-05	8	Primary	POST	Boy	0	0	0	1	0	1	0	1	0.375
904	2019	2018-04-05	8	Primary	POST	Girl	1	1	1	1	0	1	1	1	0.875
905	2019	2018-04-05	9	Primary	POST	Boy	1	1	1	1	1	1	1	1	1
906	2019	2018-04-05	8	Primary	POST	Girl	1	1	1	1	1	1	1	1	1
907	2018	2018-04-16	17	Baccalaureate	POST	Girl	1	1	1	1	1	1	1	1	1
908	2018	2018-04-16	16	Baccalaureate	POST	Girl	1	1	1	1	1	1	1	1	1
909	2018	2018-04-16	17	Baccalaureate	POST	Girl	1	1	1		0	1	1	1	0.75
910	2018	2018-04-16	16	Baccalaureate	POST	Girl	1	0	1	1	0	0	0	1	0.5
911	2018	2018-04-16	17	Baccalaureate	POST	Girl	1	1	1	1	1	0	1	1	0.875
912	2018	2018-04-16	18	Baccalaureate	POST	Boy	1	0	1	1	1	0	0	1	0.625
913	2018	2018-04-16	17	Baccalaureate	POST	Girl	1	1	1	1	1	1	1	1	1
914	2018	2018-04-16	17	Baccalaureate	POST	Girl	1	0	0	0	1	0	1	1	0.5
915	2018	2018-04-16	18	Baccalaureate	POST	Girl	1	1	1	1	1	0	0	1	0.75
916	2018	2018-04-16	16	Baccalaureate	POST	Girl	1	0	1	1	1	0	1	1	0.75
917	2018	2018-04-16	18	Baccalaureate	POST	Girl	1	1	1	1	1	0	1	1	0.875
918	2018	2018-04-25	12	Secondary	POST	Boy	1	0	1	0	1	1	1	0	0.625
919	2018	2018-04-25	13	Secondary	POST	Boy	1	1	0	1		1	0	1	0.625
920	2018	2018-04-25	12	Secondary	POST	Boy	1	1	0	1	1	1	0	1	0.75
921	2018	2018-04-25	13	Secondary	POST	Boy	1	1	1	1	1	0	1	1	0.875
922	2018	2018-04-25	12	Secondary	POST	Boy	1	1	1	1	0	1	0	1	0.75
923	2018	2018-04-25	12	Secondary	POST	Boy	1	1	1	1	0	1	0	1	0.75
924	2018	2018-04-25	13	Secondary	POST	Boy	1	1	0	1	0	1	1	1	0.75
925	2018	2018-04-25	12	Secondary	POST	Girl	1	1	0	1	1	1	0	1	0.75
926	2018	2018-04-25	12	Secondary	POST	Boy	1	1	0	1	1	1	1	1	0.875
927	2018	2018-04-25	13	Secondary	POST	Girl	1	1	0	1	1	1	1	1	0.875
928	2018	2018-04-25	12	Secondary	POST	Girl	1	1	0	1	1	1	1	1	0.875
929	2018	2018-05-07	12	Secondary	POST	Girl	1	0	1	1	1	0	0	1	0.625
930	2018	2018-05-07	12	Secondary	POST	Boy	1	1	0	1	1	1	1	1	0.875
931	2018	2018-05-07	12	Secondary	POST	Boy	1	1	0	1	1	1	0	1	0.75
932	2018	2018-05-07	12	Secondary	POST	Girl	1	1	0	1		1	1	1	0.75
933	2018	2018-05-07	12	Secondary	POST	Boy	1	1	1	1	1	1	1	1	1
934	2018	2018-05-07	12	Secondary	POST	Girl	1	1	0	1	1	1	1	1	0.875
935	2018	2018-05-07	12	Secondary	POST	Girl	1	0	1	1	1	1	0	1	0.75
936	2018	2018-05-07	12	Secondary	POST	Girl	1	1	1	1	1	0	1	1	0.875
937	2018	2018-05-07	12	Secondary	POST	Girl	1	1	0	1	1	1	1	1	0.875
938	2018	2018-05-07	13	Secondary	POST	Girl	1	1	1	1	1	1	1	1	1
939	2018	2018-05-07	12	Secondary	POST	Girl	1	1	1	1	1	1	1	1	1
940	2018	2018-05-07	12	Secondary	POST	Girl	1	1	1	1	1	1	1	1	1
941	2018	2018-05-07	12	Secondary	POST	Girl	1	1	1	1	1	1	0	1	0.875
942	2018	2018-05-07	12	Secondary	POST	Boy	1	1	0	1	1	0	1	1	0.75
943	2018	2018-05-07	12	Secondary	POST	Girl	1	1	1	1	1	1	0	1	0.875
944	2018	2018-05-07	13	Secondary	POST	Girl	1	1	1	1	1	1	0	1	0.875
945	2018	2018-05-07	13	Secondary	POST	Boy	1	1	1	1	1	1	0	1	0.875
946	2018	2018-05-07	13	Secondary	POST	Boy	1	1	1	1	1	1	0	1	0.875
947	2018	2018-05-07	12	Secondary	POST	Girl	1		0	1	1	1	0	1	0.625
948	2018	2018-05-07	12	Secondary	POST	Boy	1	1	0	0	1	1	0	0	0.5
949	2018	2018-05-07	13	Secondary	POST	Girl	0	0	1	1	1	1	1	1	0.75
950	2018	2018-05-07	13	Secondary	POST	Boy	0	0	1	1	1	1	1	1	0.75
951	2018	2018-05-07	13	Secondary	POST	Girl	0	0	1	1	1	0	0	1	0.5
952	2018	2018-05-07	12	Secondary	POST	Boy	1	1	1	1	1	1	1	1	1
953	2018	2018-05-07	13	Secondary	POST	Boy	1	1	1	1	1	1	1	0	0.875
954	2018	2018-05-07	12	Secondary	POST	Boy	1	1	1	1	1	1	0	1	0.875
955	2018	2018-05-07	13	Secondary	POST	Boy	1	1	1	1	1	1	0	1	0.875
956	2018	2018-05-07	13	Secondary	POST	Boy	1	1	1	1	1	1	1	1	1
957	2018	2018-05-07	12	Secondary	POST	Boy	1	0	1	1	1	1	1	1	0.875
958	2018	2018-05-07	13	Secondary	POST	Boy	1	1	1	1	1	1	1	1	1
959	2018	2018-05-15	18	Baccalaureate	POST	Boy	1	1	0	1	1	1	0	1	0.75
960	2018	2018-05-15	16	Baccalaureate	POST	Girl	1	1	1	1	1	1	1	1	1
961	2018	2018-05-15	16	Baccalaureate	POST	Girl	1	1	1	1	1	0	0	1	0.75
962	2018	2018-05-15	16	Baccalaureate	POST	Girl	1	1	1	1	1	1	1	1	1
963	2018	2018-05-15	16	Baccalaureate	POST	Girl	1	1	1	1	1	1	1	1	1
964	2018	2018-05-15	17	Baccalaureate	POST	Girl	1	1	1	1	1	1	1	1	1
965	2018	2018-05-15	17	Baccalaureate	POST	Girl	1	1	1	1	1	1	0	1	0.875
966	2018	2018-05-15	17	Baccalaureate	POST	Girl	1	1	1	1	1	1	1	1	1
967	2018	2018-05-15	16	Baccalaureate	POST	Girl	1	1	1	1	1	1	1	1	1
968	2018	2018-05-15	17	Baccalaureate	POST	Girl	1	1	1	1	1	1	0	1	0.875
969	2018	2018-05-15	17	Baccalaureate	POST	Boy	1	1	0	1	1	1	1	1	0.875
970	2018	2018-05-15	17	Baccalaureate	POST	Girl	1	1	1	1	1	1	1	1	1
971	2018	2018-05-15	16	Baccalaureate	POST	Girl	1	1	1	1	1	1	1	1	1
972	2018	2018-05-15	17	Baccalaureate	POST	Girl	1	1	1	1	1	0	1	1	0.875
973	2018	2018-05-15	17	Baccalaureate	POST	Boy	1	1	1	1	1	1	1	1	1
974	2018	2018-05-15	17	Baccalaureate	POST	Girl	0	1	1	0	1	1	0	1	0.625
975	2018	2018-05-15	16	Baccalaureate	POST	Girl	1	1	1	1	1	1	1	1	1
976	2018	2018-05-15	16	Baccalaureate	POST	Boy	1	1	0	1	1	1	0	0	0.625
977	2018	2018-05-15	17	Baccalaureate	POST	Girl	1	1	1	1	1	1	1	1	1
978	2018	2018-05-15	17	Baccalaureate	POST	Girl	1	1	1	1	1	1	1	1	1
979	2018	2018-05-15	17	Baccalaureate	POST	Boy	1	1	0	1	1	0	0	0	0.5
980	2018	2018-05-15	16	Baccalaureate	POST	Girl	1	1	1	1	1	0	1	1	0.875
981	2018	2018-05-15	16	Baccalaureate	POST	Girl	1	1	1	1	1	1	1	1	1
982	2019	2018-05-24	8	Primary	POST	Girl	1	1	1	1	1	1	1	1	1
983	2019	2018-05-24	9	Primary	POST	Girl	1	1	1	1	1	1	1	1	1
984	2019	2018-05-24	8	Primary	POST	Girl	1	1	1	1	1	1	1	1	1
985	2019	2018-05-24	9	Primary	POST	Boy	1	1	1	1	1	1	1	1	1
986	2019	2018-05-24	8	Primary	POST	Boy	1	1	1	1	1	1	1	1	1
987	2019	2018-05-24	9	Primary	POST	Boy	1	1	1	1	1	1	1	1	1
988	2019	2018-05-24	9	Primary	POST	Girl	1	1	0	1	0	1	1	1	0.75
989	2019	2018-05-24	9	Primary	POST	Girl	1	1	1	1	1		1	1	0.875
990	2019	2018-05-24	9	Primary	POST	Boy	1	1	0	1	1	1	1	1	0.875
991	2019	2018-05-24	8	Primary	POST	Girl	1	1	1	1	1	1	1	1	1
992	2019	2018-05-24	9	Primary	POST	Boy	1	1	0	0	1	0	1	1	0.625
993	2019	2018-05-24	9	Primary	POST	Girl		1	1	1	1	1	1	1	0.875
994	2019	2018-05-24	8	Primary	POST	Boy	1	1	1		0	0		0	0.375
995	2019	2018-05-24	8	Primary	POST	Girl		0	0	1	0	0	1	0	0.25
996	2019	2018-05-24	9	Primary	POST	Boy	0	1	0	1	1	1	1	1	0.75
997	2019	2018-05-24	8	Primary	POST	Girl	1	1	1	1	1	1	1	1	1
998	2019	2018-05-24	8	Primary	POST	Boy	1	0	0	1	1	1	1	1	0.75
999	2018	2018-06-01	11	Primary	POST	Girl	1	1	1	1	1	1	1	1	1
1000	2018	2018-06-01	11	Primary	POST	Girl	1	1	1	1	1	1	1	1	1
1001	2018	2018-06-01	11	Primary	POST	Girl	1	1	1	1	1	1	1	1	1
1002	2018	2018-06-01	11	Primary	POST	Girl	1	1	1	1	1	1	1	1	1
1003	2018	2018-06-01	10	Primary	POST	Girl	1	1	1	1	1	1	1	1	1
1004	2018	2018-06-01	11	Primary	POST	Boy	1	1	1	1	1	1	1	1	1
1005	2018	2018-06-01	11	Primary	POST	Girl	1	1	1	1	1	1	1	1	1
1006	2018	2018-06-01	10	Primary	POST	Girl	1	1	1	1	1	1	1	1	1
1007	2018	2018-06-01	10	Primary	POST	Girl	1	1	1	1	1	1	1	1	1
1008	2018	2018-06-01	10	Primary	POST	Boy	1	1	1	1	1	1	0	1	0.875
1009	2018	2018-06-01	10	Primary	POST	Boy	1	1	1	1	1	1	0	1	0.875
1010	2018	2018-06-01	10	Primary	POST	Girl	1	1	1	1	1	1	1	1	1
1011	2018	2018-06-01	11	Primary	POST	Boy	1	1	0	1	1	1	0	1	0.75
1012	2018	2018-06-01	10	Primary	POST	Girl	1	1	1	1	1	1	1	1	1
1013	2018	2018-06-01	11	Primary	POST	Boy	1	1	0	1	1	1	1	1	0.875
1014	2018	2018-06-01	10	Primary	POST	Boy	1	1	1	1	1	1	1	1	1
1015	2018	2018-06-01	11	Primary	POST	Boy	1	0	1	1	1	0	1	0	0.625
1016	2018	2018-06-01	10	Primary	POST	Girl	1	1	1	1	1	1	1	1	1
1017	2018	2018-06-01	10	Primary	POST	Girl	0		1	1	0	0	1	0	0.375
1018	2018	2018-06-01	11	Primary	POST	Girl	1	1	1	1	1	1	0	1	0.875
1019	2018	2018-06-04	10	Primary	POST	Girl	1	1	1	1	0	1	0	1	0.75
1020	2018	2018-06-04	10	Primary	POST	Girl	1	1	1	1	1	1	0	1	0.875
1021	2018	2018-06-04	10	Primary	POST	Girl	0	1	0	1	1	0	0	1	0.5
1022	2018	2018-06-04	11	Primary	POST	Boy	0	0	1	1	1	0	0	1	0.5
1023	2018	2018-06-04	11	Primary	POST	Boy	1	0	1	1	1	0	1	1	0.75
1024	2018	2018-06-04	10	Primary	POST	Girl	1	1	1	1	1	1	1	1	1
1025	2018	2018-06-04	11	Primary	POST	Boy	1	1	0	1	1	1	1	1	0.875
1026	2018	2018-06-04	11	Primary	POST	Boy	1	1	0	1	0	1	1	1	0.75
1027	2018	2018-06-04	10	Primary	POST	Girl	1	1	1	1	1	1	1	1	1
1028	2018	2018-06-04	11	Primary	POST	Girl	1	1	1	1	1	1	1	1	1
1029	2018	2018-06-04	11	Primary	POST	Girl	1	1	0	1	1	1	1	1	0.875
1030	2018	2018-06-04	10	Primary	POST	Boy	1	1	0	1	1	1	1	1	0.875
1031	2018	2018-06-04	10	Primary	POST	Boy	1	0	1	1	1	1	0	1	0.75
1032	2018	2018-06-04	10	Primary	POST	Boy	1	1	1	1	1	1	1	1	1
1033	2018	2018-06-05	11	Primary	POST	Girl	1	1	0	1	1	1	1	1	0.875
1034	2018	2018-06-05	11	Primary	POST	Boy	1	1	1	1	1	1	1	0	0.875
1035	2018	2018-06-05	11	Primary	POST	Boy		0	1	1	1	1	1	1	0.75
1036	2018	2018-06-05	10	Primary	POST	Boy	1	0	1	1	1	0	1	1	0.75
1037	2018	2018-06-05	11	Primary	POST	Boy	1	1	1	1	1	1	1	1	1
1038	2018	2018-06-05	11	Primary	POST	Girl	1	1	1	1	0	1	1	1	0.875
1039	2018	2018-06-05	11	Primary	POST	Girl	1	1	1	1	1	1	1	1	1
1040	2018	2018-06-05	10	Primary	POST	Girl	1	0	0	1	1	1	1	1	0.75
1041	2018	2018-06-05	11	Primary	POST	Girl	1	0	1	1	1	1	0	0	0.625
1042	2018	2018-06-05	11	Primary	POST	Boy	1	0	1	1	0	1	1	1	0.75
1043	2018	2018-06-05	11	Primary	POST	Boy	1	1	1	1	1	1	1	1	1
1044	2018	2018-06-05	11	Primary	POST	Boy	0	0	0	1	1	0	1	1	0.5
1045	2018	2018-06-05	10	Primary	POST	Boy	0	0	1	1	1	1	0	1	0.625
1046	2018	2018-06-05	10	Primary	POST	Boy	1	1	1	1	1	1	1	1	1
1047	2018	2018-06-05	11	Primary	POST	Boy	1	1	1	1	1	1	0	1	0.875
1048	2018	2018-06-05	10	Primary	POST	Girl	1	1	1	1	1	0	0	1	0.75
1049	2018	2018-06-05	10	Primary	POST	Boy	1	1	1	1	1	0	0	1	0.75
1050	2018	2018-06-05	10	Primary	POST	Boy	1	1	1	1	1	1	1	1	1
1051	2018	2018-06-05	10	Primary	POST	Boy	1	1	0	1	1	0	0	1	0.625
1052	2018	2018-06-05	10	Primary	POST	Boy	1	1	1	1	1	1	0	1	0.875
1053	2018	2018-06-19	12	Secondary	POST	Boy	1	1	1	1	0	1	0	1	0.75
1054	2018	2018-06-19	12	Secondary	POST	Boy	1	0	1	1	1	0	0	1	0.625
1055	2018	2018-06-19	12	Secondary	POST	Boy	1	0	0	1	0	1	0	1	0.5
1056	2018	2018-06-19	13	Secondary	POST	Boy	1	0	1	1	1	0	1	1	0.75
1057	2018	2018-06-19	12	Secondary	POST	Girl	1	1	1	1	1	1	1	1	1
1058	2018	2018-06-19	12	Secondary	POST	Boy	1	0	1	1	1	0	0	1	0.625
1059	2018	2018-06-19	13	Secondary	POST	Boy	1	0	1	1	1	0	1	1	0.75
1060	2018	2018-06-19	12	Secondary	POST	Girl	1	1	0	1	1	1	1	1	0.875
1061	2018	2018-06-19	13	Secondary	POST	Girl	1	1	1	1	1	1		1	0.875
1062	2018	2018-06-19	12	Secondary	POST	Girl	1	1	1	1	1	1	0	1	0.875
1063	2018	2018-06-19	13	Secondary	POST	Girl	1	0	1	1	1	1	1	1	0.875
1064	2018	2018-06-19	13	Secondary	POST	Boy	1	1	1	1	1	1	0	0	0.75
1065	2018	2018-06-19	13	Secondary	POST	Girl	1	1	1	1	1	1	1	1	1
1066	2018	2018-06-19	13	Secondary	POST	Girl	1	1	0	1	1	1	0	1	0.75
1067	2018	2018-06-19	13	Secondary	POST	Girl	1	1	1	1	1	1	1	1	1
1068	2018	2018-06-19	13	Secondary	POST	Girl	1	1	1	1	1	1	1	1	1
1069	2018	2018-06-19	13	Secondary	POST	Girl	1	1	1	1	1	1	1	1	1
1070	2018	2018-06-19	12	Secondary	POST	Boy	1	0	1	1	1	1	0	1	0.75
1071	2018	2018-06-19	13	Secondary	POST	Girl	0	1	1	1	1	1	1	1	0.875
1072	2018	2018-06-19	13	Secondary	POST	Boy	1	1	1	1	1	1	1	1	1
1073	2018	2018-06-19	12	Secondary	POST	Girl	1	1	1	1	1	1	1	1	1
1074	2018	2018-06-19	13	Secondary	POST	Girl	1	1	1	1	1	1	1	1	1
1075	2018	2018-06-19	13	Secondary	POST	Girl	1	1	1	1	1	0	0	1	0.75
1076	2019	2019-02-26	8	Primary	POST	Girl	1	1	1	1	1	1	1	1	1
1077	2019	2019-02-26	8	Primary	POST	Girl	1	1	0	1	1	1	1	1	0.875
1078	2019	2019-02-26	8	Primary	POST	Girl	1	1	1		0	1	1	1	0.75
1079	2019	2019-02-26	8	Primary	POST	Girl	1	1	0	1	1	1	1	1	0.875
1080	2019	2019-02-26	8	Primary	POST	Girl	1	1	1	1	1	1	1	1	1
1081	2019	2019-02-26	8	Primary	POST	Girl	1	0	0	1	0	1	0	0	0.375
1082	2019	2019-02-26	8	Primary	POST	Boy	0	1	1	1	1	1	1	1	0.875
1083	2019	2019-02-26	8	Primary	POST	Girl	1	1	1	1	0	1	1	1	0.875
1084	2019	2019-02-26	8	Primary	POST	Girl	1	1	1	1	1	1	1	1	1
1085	2019	2019-02-26	8	Primary	POST	Girl	1	0	1	1	1	1	1	1	0.875
1086	2019	2019-02-26	8	Primary	POST	Girl	0	0	0	1	1	0	1	1	0.5
1087	2019	2019-02-26	8	Primary	POST	Girl	0	0	0	1	0	1	1	1	0.5
1088	2019	2019-02-26	10	Primary	POST	Boy	1	0	1	1	0	0	0	1	0.5
1089	2019	2019-02-26	9	Primary	POST	Boy	1	1	1	1	1	1	1	1	1
1090	2019	2019-02-26	10	Primary	POST	Boy	1	1	0	1	1	1	1	1	0.875
1091	2019	2019-02-26	10	Primary	POST	Boy	1	0	1	1	1	0	0	1	0.625
1092	2019	2019-02-26	9	Primary	POST	Girl	1	1	1	1	1	1	1	1	1
1093	2019	2019-02-26	9	Primary	POST	Girl	1	1	1	1	1	1	1	1	1
1094	2019	2019-02-26	9	Primary	POST	Girl	1	1	0	1	1	1	1	1	0.875
1095	2019	2019-02-26	9	Primary	POST	Girl	1	1	1	1	0	1	1	1	0.875
1096	2019	2019-02-26	9	Primary	POST	Boy	1	0	1	1	1	0	0	1	0.625
1097	2019	2019-02-26	9	Primary	POST	Boy	1	1	1	1	1	1	1	1	1
1098	2019	2019-02-26	9	Primary	POST	Boy	1	0	1	1	1	1	1	1	0.875
1099	2019	2019-02-26	9	Primary	POST	Girl	1	0	1	1	1	1	1	1	0.875
1100	2019	2019-02-26	10	Primary	POST	Girl	1	1	0	1	1	1	0	1	0.75
1101	2019	2019-02-26	9	Primary	POST	Boy	1	1	1	1	1	1	1	0	0.875
1102	2019	2019-02-26	9	Primary	POST	Girl	1	0	1	1	0	0	1	1	0.625
1103	2019	2019-03-06	10	Primary	POST	Boy	1	1	1	1	0	1	1	1	0.875
1104	2019	2019-03-06	11	Primary	POST	Girl	1	1	1	1	1	1	1	1	1
1105	2019	2019-03-06	10	Primary	POST	Boy	1	1	1	1	1	1	1	1	1
1106	2019	2019-03-06	8	Primary	POST	Boy	1	1	1	1	1	1	1	1	1
1107	2019	2019-03-06	10	Primary	POST	Boy	1	1	0	1	0	1	1	1	0.75
1108	2019	2019-03-06	10	Primary	POST	Girl	1	1	1	1	1	1	1	1	1
1109	2019	2019-03-06	10	Primary	POST	Girl	1	1	0	1	1	1	1	1	0.875
1110	2019	2019-03-06	10	Primary	POST	Boy	1	1	1	1	1	1	1	1	1
1111	2019	2019-03-06	10	Primary	POST	Girl	1	1	1	1	1	1	1	1	1
1112	2019	2019-03-06	10	Primary	POST	Girl	1	1	1	1	0	1	1	1	0.875
1113	2019	2019-03-11	11	Primary	POST	Girl	1	1	1	1	1	1	1	1	1
1114	2019	2019-03-11	12	Primary	POST	Girl	1	1	0	1	1	1	1	1	0.875
1115	2019	2019-03-11	12	Primary	POST	Boy	1	1	1	1	1	1	1	1	1
1116	2019	2019-03-11	11	Primary	POST	Boy	1	1	1	1	1	1	1	1	1
1117	2019	2019-03-11	11	Primary	POST	Girl	1	1	1	1	0	1	1	1	0.875
1118	2019	2019-03-11	11	Primary	POST	Girl	1	1	1	1	1	1	1	1	1
1119	2019	2019-03-11	11	Primary	POST	Girl	1	1	1	1	1	1	1	1	1
1120	2019	2019-03-11	11	Primary	POST	Boy	1	1	1	1	1	1	1	1	1
1121	2019	2019-03-11	11	Primary	POST	Girl	1	1	1	1	1	1	1	1	1
1122	2019	2019-03-11	11	Primary	POST	Girl	1	0	1	1	1	1	1	1	0.875
1123	2019	2019-03-11	11	Primary	POST	Boy	1	1	1	1	1	1	1	1	1
1124	2019	2019-03-11	11	Primary	POST	Girl	1	1	1	1	1	1	1	1	1
1125	2019	2019-03-11	12	Primary	POST	Girl	1	1	1	1	1	1	1	1	1
1126	2019	2019-03-11	11	Primary	POST	Boy	1	0	1	1	1	1	1	1	0.875
1127	2019	2019-03-11	11	Primary	POST	Girl	1	1	1	1	1	0	1	1	0.875
1128	2019	2019-03-11	11	Primary	POST	Boy	1	1	1	1	1	1	1	1	1
1129	2019	2019-03-11	11	Primary	POST	Boy	1	1	1	1	1	1	1	1	1
1130	2019	2019-03-11	11	Primary	POST	Boy	1	0	1	1	1	1	1	1	0.875
1131	2019	2019-03-11	11	Primary	POST	Girl	1	1	1	1	1	1	1	1	1
1132	2019	2019-03-11	11	Primary	POST	Girl	1	0	1	1	0	0	1	1	0.625
1133	2019	2019-03-11	11	Primary	POST	Boy	1	1	1	1	1	1	1	1	1
1134	2019	2019-03-11	11	Primary	POST	Boy	1	1	1	1	1	1	1	1	1
1135	2019	2019-03-12	9	Primary	POST	Girl	1	1	1	1	1	1	1	1	1
1136	2019	2019-03-12	10	Primary	POST	Boy	1	1	1	1	1	1	1	1	1
1137	2019	2019-03-12	9	Primary	POST	Girl	1	1	1	1	1	1	1	1	1
1138	2019	2019-03-12	9	Primary	POST	Boy	1	1	0	1	0	1	1	1	0.75
1139	2019	2019-03-12	9	Primary	POST	Girl	1	1	0	1	1	1	1	1	0.875
1140	2019	2019-03-12	9	Primary	POST	Girl	1	1	0	1	1	1	1	1	0.875
1141	2019	2019-03-12	9	Primary	POST	Boy	1	1	0	1	1	1	1	1	0.875
1142	2019	2019-03-12	9	Primary	POST	Boy	1	1	0	1	1	1	1	1	0.875
1143	2019	2019-03-12	10	Primary	POST	Boy	1	1	1	1	1	1	1	1	1
1144	2019	2019-03-12	9	Primary	POST	Girl	1	1	1	1	1	1	1	1	1
1145	2019	2019-03-12	9	Primary	POST	Girl	1	1	1	1	1	1	1	1	1
1146	2019	2019-03-12	9	Primary	POST	Boy	1	1	1	1	0	1	1	0	0.75
1147	2019	2019-03-12	10	Primary	POST	Girl	1	1	1	1	1	1	1	1	1
1148	2019	2019-03-12	9	Primary	POST	Girl	1	1	1	1	1	1	1	1	1
1149	2019	2019-03-12	9	Primary	POST	Girl	1	1	1	1	1	1	1	1	1
1150	2019	2019-03-12	9	Primary	POST	Girl	1	1	0	1	1	1	1	1	0.875
1151	2019	2019-03-12	9	Primary	POST	Boy	1	1	1	1	1	1	1	1	1
1152	2019	2019-03-12	9	Primary	POST	Girl	1	1	1	1	1	1	1	1	1
1153	2019	2019-03-12	10	Primary	POST	Girl	1	1	0	1	1	1	1	1	0.875
1154	2019	2019-03-12	9	Primary	POST	Boy	1	1	1	1	1	1	1	1	1
1155	2019	2019-03-14	9	Primary	POST	Girl	1	0	0	1	1	0	1	1	0.625
1156	2019	2019-03-14	10	Primary	POST	Girl	1	1	1	1	1	1	1	1	1
1157	2019	2019-03-14	10	Primary	POST	Boy	1	0	0	1	1	1	0	1	0.625
1158	2019	2019-03-14	9	Primary	POST	Boy	1	0	1	1	1	1	1	1	0.875
1159	2019	2019-03-14	9	Primary	POST	Girl	1	1	1	1	0	0	1	1	0.75
1160	2019	2019-03-14	10	Primary	POST	Boy	1	0	1	1	1	0	1	1	0.75
1161	2019	2019-03-14	10	Primary	POST	Girl	1	0	0	1	1	0	1	1	0.625
1162	2019	2019-03-14	10	Primary	POST	Girl	1	1	1	1	1	1	1	1	1
1163	2019	2019-03-14	10	Primary	POST	Boy	1	0	0	1	1	1	0	1	0.625
1164	2019	2019-03-14	9	Primary	POST	Girl	1	1	1	1	1	1	1	1	1
1165	2019	2019-03-14	9	Primary	POST	Girl	1	0	0	1	1	0	1	1	0.625
1166	2019	2019-03-14	10	Primary	POST	Boy	1	0	1	1	1	1	1	1	0.875
1167	2019	2019-03-14	9	Primary	POST	Boy	1	0	1		1	1	1	1	0.75
1168	2019	2019-03-14	9	Primary	POST	Boy	1	1	1	1	1	1	1	1	1
1169	2019	2019-03-14	9	Primary	POST	Girl	1	0	0	1	1	1	1	1	0.75
1170	2019	2019-03-14	9	Primary	POST	Girl	1	1	0	1	1	1	1	1	0.875
1171	2019	2019-03-14	9	Primary	POST	Boy	1	1	1	1	1		1	1	0.875
1172	2019	2019-03-14	9	Primary	POST	Boy	1	1	1	1	1	1	1	1	1
1173	2019	2019-03-14	9	Primary	POST	Boy	1	1	1	1	1	1	1	1	1
1174	2019	2019-03-14	10	Primary	POST	Girl	1	1	0	1	0	0	1	1	0.625
1175	2019	2019-03-14	10	Primary	POST	Girl	1	1	1	1	1	1	1	1	1
1176	2019	2019-03-14	10	Primary	POST	Girl	1	1	0	1	1	0	0	1	0.625
1177	2019	2019-03-14	10	Primary	POST	Boy	1	1	1	1	1	1	1	1	1
1178	2019	2019-03-21	9	Primary	POST	Girl	1	1	1	1	1	0	1	1	0.875
1179	2019	2019-03-21	8	Primary	POST	Girl	1	1	1	1	0	1	1	1	0.875
1180	2019	2019-03-21	8	Primary	POST	Boy	1	1	0	0	0	0	1	1	0.5
1181	2019	2019-03-21	8	Primary	POST	Girl	1	0	0	1	0	0	0	1	0.375
1182	2019	2019-03-21	8	Primary	POST	Girl	1	1	1	1	1	1	1	1	1
1183	2019	2019-03-21	8	Primary	POST	Girl	1	1	1	1	1	1	0	0	0.75
1184	2019	2019-03-21	8	Primary	POST	Girl	1	1	0	1	0	1	1	0	0.625
1185	2019	2019-03-21	10	Primary	POST	Boy	1	1	1	1	1	1	1	1	1
1186	2019	2019-03-21	8	Primary	POST	Girl	1	1	1	1	1	1	1	1	1
1187	2019	2019-03-21	9	Primary	POST	Girl	1	1	0	1	1	1	1	1	0.875
1188	2019	2019-03-21	8	Primary	POST	Boy	1	0	1	1	0	0	1	1	0.625
1189	2019	2019-03-21	8	Primary	POST	Girl	1	1	1	1	1	1	1	1	1
1190	2019	2019-03-21	8	Primary	POST	Girl	1	1	1	1	1	1	1	1	1
1191	2019	2019-03-21	8	Primary	POST	Boy	1	1	1	1	0	0	1	1	0.75
1192	2019	2019-03-21	8	Primary	POST	Girl	1	1	0	1	1	1	1	1	0.875
1193	2019	2019-03-21	8	Primary	POST	Boy	1	1	1	1	1	1	1	1	1
1194	2019	2019-03-21	10	Primary	POST	Boy	1	1	0	1	0	1	1	1	0.75
1195	2019	2019-04-02	9	Primary	POST	Girl	1	1	1	1	1	1	1	1	1
1196	2019	2019-04-02	9	Primary	POST	Girl	1	1	1	1	1	1	1	1	1
1197	2019	2019-04-02	9	Primary	POST	Boy	1	1	1	1	0	1	1	1	0.875
1198	2019	2019-04-02	9	Primary	POST	Girl	1	1	1	1	1	1	1	1	1
1199	2019	2019-04-02	9	Primary	POST	Girl	1	1	1	1	1	1	1	1	1
1200	2019	2019-04-02	9	Primary	POST	Boy	1	1	1	1	1	1	1	1	1
1201	2019	2019-04-02	9	Primary	POST	Boy	1	1	1	1	1	1	1	1	1
1202	2019	2019-04-02	9	Primary	POST		0	1	1	1	1	1	1	1	0.875
1203	2019	2019-04-02	10	Primary	POST	Boy	1	1	0	1	0	1	1	1	0.75
1204	2019	2019-04-02	9	Primary	POST	Girl	0	1	1	1	1	1	1	1	0.875
1205	2019	2019-04-02	9	Primary	POST	Girl	1	1	0	1	1	1	1	1	0.875
1206	2019	2019-04-02	10	Primary	POST	Boy	1	1	1	1	1	1	1	1	1
1207	2019	2019-04-02	9	Primary	POST	Boy	1	1	1	1	1	1	1	1	1
1208	2019	2019-04-02	9	Primary	POST	Boy	1	1	1	1	1	1	1	1	1
1209	2019	2019-04-02	9	Primary	POST	Girl	1	1	1	1	1	1	1	1	1
1210	2019	2019-04-02	9	Primary	POST	Girl	1	1	0	1	1	1	1	1	0.875
1211	2019	2019-04-02	9	Primary	POST	Boy	1	1	1	1	1	1	1	1	1
1212	2019	2019-04-02	9	Primary	POST	Boy	1	1	1	1	1	1	1	1	1
1213	2019	2019-04-02	9	Primary	POST	Girl	1	1	1	1	1	1	1	1	1
1214	2019	2019-04-02	10	Primary	POST	Girl	1	1	1	1	1	1	1	1	1
1215	2019	2019-04-02	9	Primary	POST	Boy	1	1	0	1	1	1	1	1	0.875
1216	2019	2019-04-02	9	Primary	POST	Boy	1	1	1	1	1	1	1	1	1
1217	2019	2019-04-02	10	Primary	POST	Girl	1	1	1	1	1	1	1	1	1
1218	2019	2019-04-02	9	Primary	POST	Girl	1	1	1	1	1	1	0	1	0.875
1219	2019	2019-04-07	9	Primary	POST	Girl	1	1	1	1	1	1	1	1	1
1220	2019	2019-04-02	9	Primary	POST	Boy	1	1	1	1	1	1	1	1	1
1221	2019	2019-04-02	9	Primary	POST	Girl	1	1	1	1	1	1	1	1	1
1222	2019	2019-04-05	9	Primary	POST	Boy	1	1	1	1	0	1	1	1	0.875
1223	2019	2019-04-05	9	Primary	POST	Boy	1	1	1	1	0	1	1	0	0.75
1224	2019	2019-04-05	9	Primary	POST	Boy	1	0	1	1	0	1	1	0	0.625
1225	2019	2019-04-05	10	Primary	POST	Boy	1	1	1	1	1	1	1	1	1
1226	2019	2019-04-05	9	Primary	POST	Boy	1	1	1	1	0	1	1	1	0.875
1227	2019	2019-04-05	9	Primary	POST	Boy	1	1	0	1	1	1	1	0	0.75
1228	2019	2019-04-05	9	Primary	POST	Boy	1	1	0	1	1	1	1	1	0.875
1229	2019	2019-04-05	10	Primary	POST	Boy	1	1	0	1	1	1	1	1	0.875
1230	2019	2019-04-05	9	Primary	POST	Boy	1	0	1	1	1	0	0	0	0.5
1231	2019	2019-04-05	9	Primary	POST	Girl	1	1	1	1	1	1	1	1	1
1232	2019	2019-04-05	9	Primary	POST	Boy	1	1	0	1	1	1	0	0	0.625
1233	2019	2019-04-05	10	Primary	POST	Boy	1	1	1	1	1	1	1	1	1
1234	2019	2019-04-05	10	Primary	POST	Girl	1	1	1	1	0	1	1	1	0.875
1235	2019	2019-04-05	9	Primary	POST	Girl	1	1	0	1	0	1	1	1	0.75
1236	2019	2019-04-05	9	Primary	POST	Girl	1	1	1	1	1	0	1	1	0.875
1237	2019	2019-04-05	9	Primary	POST	Girl	1	1	0	1	1	1	1	1	0.875
1238	2019	2019-04-05	9	Primary	POST	Girl	1	1	0	1	0	1	1	1	0.75
1239	2019	2019-04-05	9	Primary	POST	Girl	1	1	1	1	1	1	1	1	1
1240	2019	2019-04-05	9	Primary	POST	Girl	1	1	0	1	0	1	1	1	0.75
1241	2019	2019-04-05	9	Primary	POST	Girl	1	1	0	1	1	1	1	1	0.875
1242	2019	2019-04-05	9	Primary	POST	Girl	1	1	0	1	0	1	1	1	0.75
1243	2019	2019-04-05	10	Primary	POST	Boy	1	1	0	1	0	1	1	1	0.75
1244	2019	2019-04-05	9	Primary	POST	Girl	1	1	0	1	1	1	1	1	0.875
1245	2019	2019-04-05	9	Primary	POST	Girl	1	1	1	1	1	1	1	1	1
1246	2019	2019-04-05	9	Primary	POST	Girl	0	1	1	1	1	0	1	1	0.75
1247	2019	2019-04-05	10	Primary	POST	Boy	1	1	1	1	1	1	1	1	1
1248	2019	2019-04-05	10	Primary	POST	Boy	1	1	0	1	1	1	1	1	0.875
1249	2019	2019-04-05	9	Primary	POST	Boy	1	1	1	1	1	1	1	1	1
1250	2019	2019-04-05	9	Primary	POST	Boy	1	1	1	1	1	1	1	1	1
1251	2019	2019-04-05	9	Primary	POST	Girl	1	1	1	1	1	1	1	1	1
1252	2019	2019-04-05	10	Primary	POST	Boy	1	1		1	1	1	1	1	0.875
1253	2019	2019-04-05	10	Primary	POST	Girl	1	1	1	1	1	1	1	1	1
1254	2019	2019-04-05	10	Primary	POST	Boy	1	1	0	1	1	0	1	1	0.75
1255	2019	2019-04-05	10	Primary	POST	Girl	1	1	1	1	1	1	1	1	1
1256	2019	2019-04-05	9	Primary	POST	Boy	1	1	1	1	1	1	1	1	1
1257	2019	2019-04-05	10	Primary	POST	Girl	1	1	0	1	1	1	1	1	0.875
1258	2019	2019-04-05	9	Primary	POST	Girl	1	1	1	1	1	1	1	1	1
1259	2019	2019-04-05	10	Primary	POST	Boy	1	1	1	1	1	1	0	1	0.875
1260	2019	2019-04-05	9	Primary	POST	Boy	1	1	1	1	1	1	1	1	1
1261	2019	2019-04-05	9	Primary	POST	Girl	1	1	1	1	1	1	1	1	1
1262	2019	2019-04-05	9	Primary	POST	Boy	1	1	1	1	1	1	1	1	1
1263	2019	2019-04-05	10	Primary	POST	Girl	1	1	1	1	1	1	1	1	1
1264	2019	2019-04-05	9	Primary	POST	Boy	1	1	1	1	1	1	1	1	1
1265	2019	2019-04-05	9	Primary	POST	Girl	1	1	1	1	1	1	0	1	0.875
1266	2019	2019-04-05	9	Primary	POST	Boy	1	1	1	1	1	1	0	1	0.875
1267	2019	2019-04-05	9	Primary	POST	Boy	1	1	1	1	1	0	1	1	0.875
1268	2019	2019-04-05	9	Primary	POST	Girl	1	1	0	1	1	1	1	1	0.875
1269	2019	2019-03-05	10	Primary	POST	Boy	1	0	1	1	1	0	1	1	0.75
1270	2019	2019-04-08	18	Baccalaureate	POST	Boy	1	1	1	1	1	1	1	1	1
1271	2019	2019-04-08	13	Secondary	POST	Boy	1	1	1	1	1	1	1	1	1
1272	2019	2019-04-08	18	Baccalaureate	POST	Boy	1	0	0	0	1	0	1	0	0.375
1273	2019	2019-04-08	16	Secondary	POST	Girl	1	1	1	1	1	1	0	1	0.875
1274	2019	2019-04-08	15	Secondary	POST	Boy	1	0	1	1	1	1	1	1	0.875
1275	2019	2019-04-08	16	Secondary	POST	Girl	0	0	1	1	1	1	1	1	0.75
1276	2019	2019-04-08	15	Secondary	POST	Girl	1	1	1	1	1	1	1	1	1
1277	2019	2019-04-08	15	Secondary	POST	Girl	1	1	1	1	1	0	1	1	0.875
1278	2019	2019-04-08	15	Secondary	POST	Boy	1	0	1	1	1	0	1	1	0.75
1279	2019	2019-04-08	16	Secondary	POST	Girl	1	1	0	1	0	1	1	0	0.625
1280	2019	2019-04-08	16	Secondary	POST	Girl	1	1	1	1	1	1	1	1	1
1281	2019	2019-04-08	15	Secondary	POST	Boy	1	0	0	1	1	1	1	1	0.75
1282	2019	2019-04-08	15	Secondary	POST	Boy		1	1	1	1	0	0	1	0.625
1283	2019	2019-04-28	13	Secondary	POST	Boy	1	1	0	1	0	1	1	1	0.75
1284	2019	2019-04-08	12	Secondary	POST	Girl	1	1	1	1	1	0	1	1	0.875
1285	2019	2019-04-08	13	Secondary	POST	Girl	1	0	1	1	1	1	1	1	0.875
1286	2019	2019-04-08	12	Secondary	POST	Girl	1	1	1	1	1	1	1	1	1
1287	2019	2019-04-08	13	Secondary	POST	Girl	0	1	1	1	1	0	0	1	0.625
1288	2019	2019-04-08	12	Secondary	POST	Girl	1	0	1	1	1	0	0	1	0.625
1289	2019	2019-04-08	13	Secondary	POST	Girl	1	1	1	1	1	1	1	1	1
1290	2019	2019-04-08	13	Secondary	POST	Girl	1	1	1	1	1	1	1	1	1
1291	2019	2019-04-08	12	Secondary	POST	Boy	1	0	1	1	1	1	0	1	0.75
1292	2019	2019-04-08	13	Secondary	POST	Boy	0	1	1	1	1	1	1	1	0.875
1293	2019	2019-04-08	12	Secondary	POST	Girl	1	0	1	1	1	0	1	1	0.75
1294	2019	2019-04-08	12	Secondary	POST	Boy	0	1	1	1	1	1	1	1	0.875
1295	2019	2019-04-08	13	Secondary	POST	Boy	1	1	1	1	1	1	1	1	1
1296	2019	2019-04-08	12	Secondary	POST	Boy	1	1	0	1	1	1	1	1	0.875
1297	2019	2019-04-08	12	Secondary	POST	Boy	1	1	1	1	1	1	1	1	1
1298	2019	2019-04-08	12	Secondary	POST	Boy	1	1	0	1	1	1	1	1	0.875
1299	2019	2019-04-08	12	Secondary	POST	Girl	1	1	0	1	1	1	1	1	0.875
1300	2019	2019-04-08	12	Secondary	POST	Girl	0	1	1	1	1	1	1	1	0.875
1301	2019	2019-04-10	16	Baccalaureate	POST	Girl	0	1	1	1	1	0	1	1	0.75
1302	2019	2019-04-10	17	Baccalaureate	POST	Boy	1	1	1	1	1	1	1	1	1
1303	2019	2019-04-10	17	Baccalaureate	POST	Girl	1	1	1	1	1	1	1	1	1
1304	2019	2019-04-10	18	Baccalaureate	POST	Boy	1	1	1	1	1	1	1	1	1
1305	2019	2019-04-10	17	Baccalaureate	POST	Boy	1	1	1	1	1	1	1	1	1
1306	2019	2019-04-10	18	Baccalaureate	POST	Girl	1	1	1	1	1	1	1	1	1
1307	2019	2019-04-10	18	Baccalaureate	POST	Girl	1	0	1	1	1	1	1	1	0.875
1308	2019	2019-04-10	16	Baccalaureate	POST	Girl	1	1	1	1	1	1	1	1	1
1309	2019	2019-04-10	16	Baccalaureate	POST	Girl	1	1	1	1	1	1	1	1	1
1310	2019	2019-04-10	17	Baccalaureate	POST	Girl	1	0	1	1	1	0	1	1	0.75
1311	2019	2019-04-10	16	Baccalaureate	POST	Girl	0	1	0	1	1	1	1	1	0.75
1312	2019	2019-04-10	16	Baccalaureate	POST	Girl	1	1	1	1	1	1	1	1	1
1313	2019	2019-04-10	18	Baccalaureate	POST	Girl	1	0	1	1	1	0	0	0	0.5
1314	2019	2019-04-10	16	Baccalaureate	POST	Girl	1	1	1	1	1	1	1	1	1
1315	2019	2019-04-10	16	Baccalaureate	POST	Boy	1	1	1	1	1	1	1	1	1
1316	2019	2019-04-10	16	Baccalaureate	POST	Girl	1	1	1	1	1	1	0	1	0.875
1317	2019	2019-04-10	17	Baccalaureate	POST		1	1	1	1	1	1	1	1	1
1318	2019	2019-04-24	8	Primary	POST		1	1	0	1	0	1	1	1	0.75
1319	2019	2019-04-24	10	Primary	POST	Boy	1	0	0	1	0	1	1	1	0.625
1320	2019	2019-04-24	9	Primary	POST	Girl	1	1	0	1	1	1	1	1	0.875
1321	2019	2019-04-24	9	Primary	POST	Girl	1	1	0	1	1	1	1	1	0.875
1322	2019	2019-04-24	8	Primary	POST	Girl	1	1	0	1	0	1	1	1	0.75
1323	2019	2019-04-24	10	Primary	POST	Boy	1	0	1	0	1	1	1	0	0.625
1324	2019	2019-04-24	10	Primary	POST	Girl	1	1	0	1	1	0	1	1	0.75
1325	2019	2019-04-24	8	Primary	POST		1	1	0	1	0	1	1	1	0.75
1326	2019	2019-04-24	10	Primary	POST	Girl	1	1	0	1		1	1	1	0.75
1327	2019	2019-04-24	10	Primary	POST	Girl	1	1	0	1	0	1	1	1	0.75
1328	2019	2019-04-24	8	Primary	POST	Girl	1	1	0	1		1	1	1	0.75
1329	2019	2019-04-24	9	Primary	POST	Boy	1	1	0	1	0	1	1	1	0.75
1330	2019	2019-04-24	8	Primary	POST	Girl	1	1	0	1	0	1	1	1	0.75
1331	2019	2019-04-24	8	Primary	POST	Girl	0	1	0	1	0	1	1	1	0.625
1332	2019	2019-04-24	8	Primary	POST	Girl		1	1	1	1	1	1	1	0.875
1333	2019	2019-04-24	8	Primary	POST	Girl		1	1	1	1	1	1	1	0.875
1334	2019	2019-04-24	10	Primary	POST	Boy	1	1	1	1	1	1	1	1	1
1335	2019	2019-04-24	10	Primary	POST	Boy	1	1	1	1	1	1	1	1	1
1336	2019	2019-04-24	10	Primary	POST		1	1	1	1	1	1	1	1	1
1337	2019	2019-04-24	9	Primary	POST	Girl	1	1	0	1	1	1	1	1	0.875
1338	2019	2019-04-24	8	Primary	POST	Boy	1	1	1	1	1	1	1	1	1
1339	2019	2019-04-24	8	Primary	POST	Boy	1	1	0	1	1	1	1	1	0.875
1340	2019	2019-04-24	10	Primary	POST	Boy	1	1	1	1	1	1	1	1	1
1341	2019	2019-04-24	9	Primary	POST	Girl	1	1	0	1	1	1	1	0	0.75
1342	2019	2019-04-24	8	Primary	POST	Boy	1	1	1	1	1	1	1	1	1
1343	2019	2019-04-24	8	Primary	POST	Girl	0	0	0	1	1	1	1	1	0.625
1344	2019	2019-04-30	9	Primary	POST	Boy	1	1	1	1	0	1	1	1	0.875
1345	2019	2019-04-30	8	Primary	POST	Girl	1	1	1	1	1	1	1	1	1
1346	2019	2019-04-30	8	Primary	POST	Girl	1	1	1	1	1	1	1	1	1
1347	2019	2019-04-30	8	Primary	POST	Girl	1	1	1	1	1	1	1	1	1
1348	2019	2019-04-30	8	Primary	POST	Girl	1	1	1	1	1	1	1	1	1
1349	2019	2019-04-30	8	Primary	POST	Boy	1	1	0	1	1	1	1	1	0.875
1350	2019	2019-04-30	8	Primary	POST	Boy	1	1	1	1	1	1	1	1	1
1351	2019	2019-04-30	8	Primary	POST	Girl	1	1	1	1	1	1	1	1	1
1352	2019	2019-04-30	8	Primary	POST	Girl	1	1	1	1	1	1	1	1	1
1353	2019	2019-04-30	8	Primary	POST	Boy	1	1	0	1	1	0	1	1	0.75
1354	2019	2019-04-30	10	Primary	POST	Boy	1	1	1	1	1	1	1	1	1
1355	2019	2019-04-30	9	Primary	POST	Girl	1	1	0	1	0	1	1	1	0.75
1356	2019	2019-04-30	8	Primary	POST	Boy	1	0	1	1	1	0	1	1	0.75
1357	2019	2019-04-30	9	Primary	POST	Boy	1	0	0	1	1	1	1	1	0.75
1358	2019	2019-04-24	9	Primary	POST	Girl	1	1	0	1	1	0	0	1	0.625
1359	2019	2019-04-24	8	Primary	POST	Girl	1	1	1	1	1	1	1	0	0.875
1360	2019	2019-04-24	9	Primary	POST	Girl	1	1	1	1	1	1	1	1	1
1361	2019	2019-04-24	9	Primary	POST	Girl	1	1	1	1	1	1			0.75
1362	2019	2019-04-24	9	Primary	POST	Boy	1	1	1	1	1	1	1	1	1
1363	2019	2019-04-24	8	Primary	POST		1	1	1	1	1	1	1	0	0.875
1364	2019	2019-04-24	9	Primary	POST	Boy	1	1	0	1	1	0	1	1	0.75
1365	2019	2019-04-24	9	Primary	POST	Boy	1	1	0	1	1	1	1	1	0.875
1366	2019	2019-04-24	8	Primary	POST	Girl	1	1	0	1	1	1	1	1	0.875
1367	2019	2019-04-24	9	Primary	POST	Girl	1	1	1	1	1	1	1	1	1
1368	2019	2019-04-24	8	Primary	POST	Boy	1	1	1	1	1	1	1	1	1
1369	2019	2019-04-24	9	Primary	POST	Girl	1	1	1	1	1	1	1	1	1
1370	2019	2019-04-24	9	Primary	POST	Boy	1	1	0	1	1	1	1	1	0.875
1371	2019	2019-04-24	8	Primary	POST	Boy	1	1		1	0		0	1	0.5
1372	2019	2019-04-24	9	Primary	POST	Girl	1	1	0	1	0	1	1	1	0.75
1373	2019	2019-04-24	10	Primary	POST		1	1	0	1	1	1	1	1	0.875
1374	2019	2019-04-24	10	Primary	POST	Boy	1	1	0	1			1	1	0.625
1375	2019	2019-04-24	8	Primary	POST	Girl	1	1	0	1		1	1	1	0.75
1376	2019	2019-04-24	9	Primary	POST	Boy	1	0	1	1	1	1	1	1	0.875
1377	2019	2019-04-24	8	Primary	POST	Girl	1	1	0	1	0	1	1	1	0.75
1378	2019	2019-04-24	8	Primary	POST	Boy	1	1	0	1	0	1	1	1	0.75
1379	2019	2019-04-24	9	Primary	POST	Boy	1	1	0	1	1	1	1	1	0.875
1380	2019	2019-04-25	12	Secondary	POST	Boy	1	1	0	1	1	1	0	1	0.75
1381	2019	2019-04-25	12	Secondary	POST	Boy	1	1	0	1	1	1	0	1	0.75
1382	2019	2019-04-25	12	Secondary	POST	Girl	0	1	1	1	1	1	1	1	0.875
1383	2019	2019-04-25	12	Secondary	POST		1	1	1	1	1	1	1	1	1
1384	2019	2019-04-25	12	Secondary	POST	Girl	1	1	1	1	1	1	1	1	1
1385	2019	2019-04-25	16	Secondary	POST	Girl	0	1	1	1	1	1	1	1	0.875
1386	2019	2019-04-25	13	Secondary	POST	Boy	0	1	1	1	1	1	1	1	0.875
1387	2019	2019-04-25	13	Secondary	POST	Girl	1	1	1	1	1	1	1	1	1
1388	2019	2019-04-25	13	Secondary	POST	Girl	1	1	1	1	1	1	1	1	1
1389	2019	2019-04-25	12	Secondary	POST	Boy	1	1	0	1	1	1	1	1	0.875
1390	2019	2019-04-25	13	Secondary	POST	Girl	1	1	1	1	1	1		1	0.875
1391	2019	2019-04-25	14	Secondary	POST	Girl	1	1	1	1	1	1	0	0	0.75
1392	2019	2019-04-25	13	Secondary	POST	Boy	1	1	1	1	1	1	1	1	1
1393	2019	2019-04-25	12	Secondary	POST	Boy	0	1	1	1	1	1	1	1	0.875
1394	2019	2019-04-25	13	Secondary	POST	Boy	1	1	1	1	1	1	1	1	1
1395	2019	2019-04-25	12	Secondary	POST	Boy	1	1	1	1	1	1	1	1	1
1396	2019	2019-04-25	13	Secondary	POST	Girl	1	1	0	1	1	1	0	1	0.75
1397	2019	2019-04-23	13	Secondary	POST	Boy	1	0	1	1	1	1	1	0	0.75
1398	2019	2019-04-25	13	Secondary	POST		1	1	1	1	1	1	0	1	0.875
1399	2019	2019-04-25	13	Secondary	POST	Girl	1	1	1	1	1	1	1	1	1
1400	2019	2019-04-25	12	Secondary	POST	Boy	1	1	1	1	1	1	1	1	1
1401	2019	2019-04-25	13	Secondary	POST	Girl	1	1	1	1	1	1	1	1	1
1402	2019	2019-04-25	13	Secondary	POST	Girl	1	1	1	1	1	1	0	1	0.875
1403	2019	2019-04-25	12	Secondary	POST	Girl	1	1	1	1	1	1	1	1	1
1404	2019	2019-04-25	13	Secondary	POST	Boy		0	1	1	1	1	1	1	0.75
1405	2019	2019-04-25	13	Secondary	POST	Boy	1	0	0	1	1	0	0	1	0.5
1406	2019	2019-04-25	13	Secondary	POST	Boy	1	1	1	1	1	1	0	1	0.875
1407	2019	2019-04-25	12	Secondary	POST	Boy	1	1	1	1	1	1	1	1	1
1408	2019	2019-04-25	12	Secondary	POST	Boy	1	1	1	1	1	1	1	1	1
1409	2019	2019-04-25	12	Secondary	POST	Boy	1	1	1	1	1	1	1	1	1
1410	2019	2019-04-25	16	Secondary	POST	Boy	1	0	1	1	1	1		1	0.75
1411	2019	2019-04-25	13	Secondary	POST	Girl	1	1	0	1	1	1	0	1	0.75
1412	2019	2019-04-25	13	Secondary	POST	Girl	1	0	1	1	1	1		1	0.75
1413	2019	2019-04-25	12	Secondary	POST	Boy	1	1	1	1	1	1			0.75
1414	2019	2019-04-25	12	Secondary	POST		1	1	1	1	1	1			0.75
1415	2019	2019-04-25	12	Secondary	POST	Boy	0	1	1	1	1	1	1	1	0.875
1416	2019	2019-04-25	12	Secondary	POST	Girl	1	0	1	1	1	0	0	1	0.625
1417	2019	2019-04-25	13	Secondary	POST		1	1	1	1	1	0	1	1	0.875
1418	2019	2019-04-25	13	Secondary	POST	Boy	0	1	1	1	1	1	0	1	0.75
1419	2019	2019-04-25	12	Secondary	POST	Girl	1	1	1	1	1	0	1	1	0.875
1420	2019	2019-04-25	12	Secondary	POST	Girl	1	1	1	1	1	1	0	1	0.875
1421	2019	2019-04-25	13	Secondary	POST	Boy	1	1	1	1	0	1	1	1	0.875
1422	2019	2019-04-25	13	Secondary	POST	Boy	1	1	1	1	1	1	1	1	1
1423	2019	2019-04-25	12	Secondary	POST	Girl	1	1	1	1	1	1	1	1	1
1424	2019	2019-04-25	13	Secondary	POST	Boy	1	1	0	1	1	1	0	1	0.75
1425	2019	2019-04-25	13	Secondary	POST	Boy	1	1	0	1	0	1	1	1	0.75
1426	2019	2019-04-25	12	Secondary	POST	Girl	1	1	1	1	1	1	1	1	1
1427	2019	2019-04-26	12	Secondary	POST	Girl	1	1	1	1	1	1	1	1	1
1428	2019	2019-04-26	13	Secondary	POST	Boy	1	1	0	1	1	1	1	0	0.75
1429	2019	2019-04-26	12	Secondary	POST	Girl	0	1	1	1	1	1	1	1	0.875
1430	2019	2019-04-26	12	Secondary	POST	Girl	1	1	1	1	1	1	0	1	0.875
1431	2019	2019-04-26	12	Secondary	POST	Girl	1	1	1	1	1	1	1	1	1
1432	2019	2019-04-26	12	Secondary	POST	Girl		1	1	1	1	1	0	1	0.75
1433	2019	2019-04-26	12	Secondary	POST	Girl	1	1	1	0	1	1	1	1	0.875
1434	2019	2019-04-26	12	Secondary	POST	Girl	1	1		1	1	1		1	0.75
1435	2019	2019-04-26	12	Secondary	POST	Girl	1	1	1	1	1	1	1	0	0.875
1436	2019	2019-04-26	13	Secondary	POST	Boy	1	1	1	1	1	1	1	1	1
1437	2019	2019-04-26	13	Secondary	POST	Girl	1	1	0	1	1	1	1	1	0.875
1438	2019	2019-04-26	12	Secondary	POST	Girl	1	1	1	1	1	1	1	1	1
1439	2019	2019-04-26	13	Secondary	POST	Girl	1	0	0	1	0	1	1	1	0.625
1440	2019	2019-04-26	13	Secondary	POST	Girl	1	1	1	1	1	1	0	1	0.875
1441	2019	2019-04-26	12	Secondary	POST	Boy	1	1	1	1	1	1	1	1	1
1442	2019	2019-04-26	12	Secondary	POST	Girl	0	1	1	1	1	1	0	1	0.75
1443	2019	2019-04-26	13	Secondary	POST	Boy	1	1	1	1	1	1	1	0	0.875
1444	2019	2019-04-26	12	Secondary	POST	Girl	1	1	1	1	1	1	1	1	1
1445	2019	2019-04-26	12	Secondary	POST	Girl	1	1	1	1	1	1	1	1	1
1446	2019	2019-04-26	12	Secondary	POST	Boy	1	1	0	1	1	0	1	0	0.625
1447	2019	2019-04-26	13	Secondary	POST	Girl	1	1	1	1	1	1	0	1	0.875
1448	2019	2019-04-26	12	Secondary	POST	Boy		1	1	1	1	1	1	1	0.875
1449	2019	2019-04-26	13	Secondary	POST	Boy	1	0	1	1	1	0	0	1	0.625
1450	2019	2019-04-26	13	Secondary	POST	Girl	1	1	1	1	1	1	1	1	1
1451	2019	2019-04-26	12	Secondary	POST	Girl	1	1	1	1	1	1		1	0.875
1452	2019	2019-04-26	12	Secondary	POST	Boy	1	1	1	1	1	1	0	1	0.875
1453	2019	2019-05-07	15	Secondary	POST	Boy	1	1	1	1	1	1	1	1	1
1454	2019	2019-05-07	14	Secondary	POST	Boy	1	0	1	1	1	1	1	0	0.75
1455	2019	2019-05-07	14	Secondary	POST	Boy	1	1	1	1	1	1	1	1	1
1456	2019	2019-05-07	14	Secondary	POST	Boy	1	1	1	1	1	1	1	1	1
1457	2019	2019-05-07	16	Secondary	POST	Girl	1	1	0	1	1	1	0	1	0.75
1458	2019	2019-05-07	15	Secondary	POST	Girl	1	1	0	1	1	1	1	1	0.875
1459	2019	2019-05-07	15	Secondary	POST	Boy	1	1	1	1	1	1	0	1	0.875
1460	2019	2019-05-07	14	Secondary	POST	Boy	1	1	1	1	1	0	0	0	0.625
1461	2019	2019-05-07	15	Secondary	POST	Boy	1	0	1	1	1	0	0	1	0.625
1462	2019	2019-05-07	14	Secondary	POST	Boy	0	1	1	1	1	1	1	1	0.875
1463	2019	2019-05-07	15	Secondary	POST		1	0	1	1	1	1	1	1	0.875
1464	2019	2019-05-07	14	Secondary	POST	Boy	0	0	1	1	1	0			0.375
1465	2019	2019-05-07	14	Secondary	POST	Boy	1	1	1	1	1	1	1	1	1
1466	2019	2019-05-07	14	Secondary	POST	Boy	1	1	1	1	1	1	1	1	1
1467	2019	2019-05-07	15	Secondary	POST	Boy		1	1	1	1	1	1	0	0.75
1468	2019	2019-05-07	15	Secondary	POST	Boy	1	1	1	0	1	1	0	0	0.625
1469	2019	2019-05-07	14	Secondary	POST	Boy	1	1	1	1	1	1	1	1	1
1470	2019	2019-05-07	14	Secondary	POST	Boy	1	1	1	1	1	1	1	1	1
1471	2019	2019-05-07	14	Secondary	POST	Boy	1	0	0	0	0	0	1	0	0.25
1472	2019	2019-05-07	15	Secondary	POST	Boy	1	1	1	1	1	1	1	1	1
1473	2019	2019-05-07	15	Secondary	POST	Boy	1	1	1	0	1	1	1	0	0.75
1474	2019	2019-05-08	12	Secondary	POST	Girl	1	0	0	1	1	0	0	1	0.5
1475	2019	2019-05-08	12	Secondary	POST	Girl	1	1	1	1	1	1	1	1	1
1476	2019	2019-05-08	13	Secondary	POST	Girl	1	1	1	1	1	1	1	1	1
1477	2019	2019-05-08	12	Secondary	POST	Girl	1	1	1	1	1	1	1	1	1
1478	2019	2019-05-08	12	Secondary	POST	Boy	1	1	1	1	1	1	1	1	1
1479	2019	2019-05-08	12	Secondary	POST	Boy		1	1	1	1	1	0	1	0.75
1480	2019	2019-05-08	13	Secondary	POST	Boy	1	1	1	1	1	1	1	1	1
1481	2019	2019-05-08	13	Secondary	POST	Girl	1	1	0	1	1	1	1	0	0.75
1482	2019	2019-05-08	13	Secondary	POST	Girl	1	0		1	0	1	1	1	0.625
1483	2019	2019-05-08	13	Secondary	POST	Boy	1	1	1	1	1	1	1	1	1
1484	2019	2019-05-08	13	Secondary	POST	Girl	1	1	1	1	1	1	1	1	1
1485	2019	2019-05-08	12	Secondary	POST	Girl	1	1	1	1	1	1	1	1	1
1486	2019	2019-05-08	12	Secondary	POST	Girl	1	1	1	1	1	1	1	1	1
1487	2019	2019-05-08	13	Secondary	POST	Girl	1	0	1	1	1	1	1	1	0.875
1488	2019	2019-05-08	12	Secondary	POST	Girl	1	1	1	1	1	1	1	1	1
1489	2019	2019-05-08	13	Secondary	POST	Girl	1	1	0	1	1	1	1	1	0.875
1490	2019	2019-05-08	12	Secondary	POST	Boy	1	1	0	1	1	1	1	1	0.875
1491	2019	2019-05-08	13	Secondary	POST	Boy	1	1	1	1	1	1		1	0.875
1492	2019	2019-05-08	12	Secondary	POST	Girl	1	1	1	1	1	1	1	1	1
1493	2019	2019-05-08	13	Secondary	POST	Girl	1	1	1	1	1	1	1	1	1
1494	2019	2019-05-08	13	Secondary	POST	Girl	0	1	0	1	1	1	1	1	0.75
1495	2019	2019-05-08	13	Secondary	POST	Boy	1	1	1	1	1	1	1	1	1
1496	2019	2019-05-08	12	Secondary	POST	Boy	1	1	1	1	1	1	1	1	1
1497	2019	2019-05-08	12	Secondary	POST	Boy	1	0	0	1	1	0	1	1	0.625
1498	2019	2019-05-08	12	Secondary	POST	Boy	1	1	0	1	0	1	1	1	0.75
1499	2019	2019-05-08	13	Secondary	POST	Girl	0	1	1	1	1	1	0	1	0.75
1500	2019	2019-05-08	13	Secondary	POST	Boy	1	1	1	1	1	1	1	1	1
1501	2019	2019-05-08	13	Secondary	POST	Boy	1	1	0	1	1	1		1	0.75
1502	2019	2019-05-08	13	Secondary	POST	Boy	1	1	0	1	1	1	1	1	0.875
1503	2019	2019-05-08	13	Secondary	POST	Boy	1	0	1	1	1	0	1	1	0.75
1504	2019	2019-05-08	13	Secondary	POST	Boy	0	0	0	1	1	1	1	1	0.625
1505	2019	2019-05-08	12	Secondary	POST	Boy	1	0	0	1	1	0	1	1	0.625
1506	2019	2019-05-08	13	Secondary	POST	Boy	1	1	1	1	1	1	0	1	0.875
1507	2019	2019-05-08	13	Secondary	POST	Girl	0	1	1	1	1	1	1	1	0.875
1508	2019	2019-05-08	12	Secondary	POST	Girl	1	1	0	1	1	1	1	1	0.875
1509	2019	2019-05-08	13	Secondary	POST	Boy	1	1	1	1	1	1	1	1	1
1510	2019	2019-05-08	13	Secondary	POST	Girl	1	1	0	1	1	1	1	1	0.875
1511	2019	2019-05-08	14	Secondary	POST	Girl	1	1	1	1	1	1	1	1	1
1512	2019	2019-05-14	10	Primary	POST	Boy	1	1	0	1	1	1	1	1	0.875
1513	2019	2019-05-14	10	Primary	POST	Girl	1	1	1	0	1	1	1	1	0.875
1514	2019	2019-05-14	10	Primary	POST	Girl	1	0	1	1	1		1	1	0.75
1515	2019	2019-05-14	11	Primary	POST	Boy	1	1	0	1	0	1	1	1	0.75
1516	2019	2019-05-14	11	Primary	POST	Boy	1	1	0	1	1	1	1	1	0.875
1517	2019	2019-05-14	11	Primary	POST		1	1	1	1	1	1	1	1	1
1518	2019	2019-05-14	10	Primary	POST	Girl	1	1	1	1	1	1	1	1	1
1519	2019	2019-05-14	10	Primary	POST	Boy	1	1	0	1	1	1	1	1	0.875
1520	2019	2019-05-14	11	Primary	POST	Boy	1	1	0	1	1	1	1	1	0.875
1521	2019	2019-05-14	10	Primary	POST	Girl	1	1	0	1	1	1	1	1	0.875
1522	2019	2019-05-14	10	Primary	POST	Girl	1	1	1	1	1	1	1	1	1
1523	2019	2019-05-14	10	Primary	POST	Girl	1	1	1	1	1	1	1	1	1
1524	2019	2019-05-14	10	Primary	POST	Boy	1	1	0	1	1	1	1	1	0.875
1525	2019	2019-05-14	10	Primary	POST	Boy	0	1	1	1	1	1	1	1	0.875
1526	2019	2019-05-14	11	Primary	POST	Boy	1	1	0	1	1	1	1	1	0.875
1527	2019	2019-05-14	10	Primary	POST	Boy	1	1	1	1	1	1	1	1	1
1528	2019	2019-05-13	13	Secondary	POST	Girl	1	1	1	1	1	1	0	1	0.875
1529	2019	2019-05-13	12	Secondary	POST	Boy	1	1	1	1	1	1	1	1	1
1530	2019	2019-05-13	13	Secondary	POST	Boy	1	1	1	1	1	1	1	1	1
1531	2019	2019-05-13	13	Secondary	POST	Girl	1	1	1	1	1	1	0	0	0.75
1532	2019	2019-05-13	13	Secondary	POST	Girl	1	1	1	1	1	1	1	1	1
1533	2019	2019-05-13	13	Secondary	POST	Boy	1	1	1	1	1	1	1	1	1
1534	2019	2019-05-13	12	Secondary	POST	Boy	1	1	1	1	1	1	1	1	1
1535	2019	2019-05-13	13	Secondary	POST	Girl	1	1	1	1	1	1	0	1	0.875
1536	2019	2019-05-13	14	Secondary	POST	Girl	0	1	1	1	1	1	1	1	0.875
1537	2019	2019-05-13	12	Secondary	POST	Girl	1	1	1	1	1	1	0	1	0.875
1538	2019	2019-05-13	12	Secondary	POST	Girl	1	1	1	1	1	1	0	1	0.875
1539	2019	2019-05-13	13	Secondary	POST	Boy	1	1	1	1	1	1	1	1	1
1540	2019	2019-05-13	12	Secondary	POST	Boy	1	1	1	1	1	1	1	1	1
1541	2019	2019-05-13	13	Secondary	POST	Boy	1	1	1	1	1	1	0	1	0.875
1542	2019	2019-05-13	12	Secondary	POST	Girl	1	1	1	1	1	0	1	1	0.875
1543	2019	2019-05-13	13	Secondary	POST	Boy	1	1	1	1	1	1	0	0	0.75
1544	2019	2019-05-13	12	Secondary	POST	Boy	1	1	1	1	1	1	0	1	0.875
1545	2019	2019-05-13	13	Secondary	POST	Girl	1	1	1	1	1	1	1	1	1
1546	2019	2019-06-14	13	Secondary	POST	Girl	1	1	1	1	1	1	1	1	1
1547	2019	2019-06-14	12	Secondary	POST	Girl	1	1	1	1	1	1	0	1	0.875
1548	2019	2019-06-14	13	Secondary	POST	Girl	1	0	1	1	1	1	0	1	0.75
1549	2019	2019-06-14	12	Secondary	POST	Boy	1	0	1	1	1	1	0	1	0.75
1550	2019	2019-06-14	12	Secondary	POST	Boy	1	1	1	1	1	0	0	1	0.75
1551	2019	2019-06-14	13	Secondary	POST		1	1	1	1	1	1	1	1	1
1552	2019	2019-06-14	13	Secondary	POST	Girl	1	0	1	1	1	1	0	1	0.75
1553	2019	2019-06-14	12	Secondary	POST	Boy	1	1	1	1	1	1	1	1	1
1554	2019	2019-06-14	12	Secondary	POST	Boy	1	1	1	1	1	1	0	1	0.875
1555	2019	2019-06-14	13	Secondary	POST	Boy	1	1	1	1	1	1	1	1	1
1556	2019	2019-06-14	13	Secondary	POST	Boy	1	1	1	1	1	1	1	1	1
1557	2019	2019-06-14	12	Secondary	POST	Girl	1	0	1	1	1	1	1	1	0.875
1558	2019	2019-06-14	12	Secondary	POST	Girl	1	1	1	1	1	1	1	1	1
1559	2019	2019-06-14	13	Secondary	POST	Girl	1	0	1	1	1	1	0	1	0.75
1560	2019	2019-06-14	13	Secondary	POST	Boy	1	1	1	1	1	1	0	1	0.875
1561	2019	2019-06-14	12	Secondary	POST	Boy	1	1	0	1	1	1	0	1	0.75
1562	2019	2019-06-14	13	Secondary	POST	Boy	1	1	1	1	1	0	0	1	0.75
1563	2019	2019-06-14	12	Secondary	POST	Girl	1	1	1	1	1	1	0	1	0.875
1564	2019	2019-06-14	13	Secondary	POST	Boy	1	1	1	1	1	1	0	0	0.75
1565	2019	2019-06-14	13	Secondary	POST	Boy	1	1	1	1	1	1	0	1	0.875
1566	2019	2019-06-14	13	Secondary	POST	Girl	1	0	1	1	1	1	1	1	0.875
1567	2019	2019-06-14	14	Secondary	POST	Boy	1	0	1	0	1	0	0	1	0.5
1568	2019	2019-06-14	12	Secondary	POST	Boy	1	1	1	1	1	1	0	1	0.875
1569	2019	2019-06-14	13	Secondary	POST	Boy	1	1	1	1	1	1	1	1	1
1570	2019	2019-06-14	13	Secondary	POST	Girl	1		0	1	1			1	0.5
1571	2019	2019-06-14	12	Secondary	POST	Girl	1	1	0	1	1	1	1	1	0.875
1572	2019	2019-06-14	13	Secondary	POST	Girl	1	1	1	1	1	1	1	1	1
1573	2019	2019-06-14	12	Secondary	POST	Boy	1	1	1	0	1	0			0.5
1574	2019	2019-06-14	12	Secondary	POST	Girl	1	1	1	1	1	1	1	1	1
1575	2019	2019-06-14	13	Secondary	POST	Girl	1	1	1	1	1	1	1	1	1
1576	2019	2019-06-14	12	Secondary	POST	Boy	1	1	1	1	1	1	1	1	1
1577	2019	2019-06-14	13	Secondary	POST	Boy	1	1	1	1	1	1	1	1	1
1578	2019	2019-06-14	12	Secondary	POST	Boy	1	1	0	1	1	1	1	1	0.875
1579	2019	2019-06-14	13	Secondary	POST	Boy	1	1	1	1	1	1	1	1	1
1580	2019	2019-06-14	12	Secondary	POST	Girl	1	1	1	1	1	1	1	1	1
1581	2019	2019-06-14	12	Secondary	POST	Girl	1	1	1	1	1	1	1	1	1
1582	2019	2019-06-14	13	Secondary	POST	Girl	1	1	1	1	1	1	1	1	1
1583	2019	2019-06-14	12	Secondary	POST	Boy	1	1	1	1	1	1	1	1	1
1584	2019	2019-06-14	13	Secondary	POST	Boy	1	0	1	1	1	0	1	1	0.75
1585	2019	2019-06-14	13	Secondary	POST	Boy	1	1	1	1	1	1	1	1	1
1586	2019	2019-06-14	14	Secondary	POST	Boy	1	1	1	1	1	1	1	1	1
1587	2019	2019-06-14	13	Secondary	POST	Girl	1	1	0	1	1	1	1	1	0.875
1588	2019	2019-06-14	13	Secondary	POST	Girl	1	1	1	1	1	1	1	1	1
1589	2019	2019-06-14	12	Secondary	POST	Girl	1	1	1	1	1	1	1	0	0.875
1590	2019	2019-06-14	13	Secondary	POST	Girl	1	1	1	1	1	1	1	1	1
1591	2019	2019-06-14	13	Secondary	POST	Boy	1	1	1	1	1	1	0	1	0.875
1592	2019	2019-06-14	13	Secondary	POST	Girl	1	1	1	1	1	1	1	1	1
1593	2019	2019-06-14	13	Secondary	POST	Girl	1	1	1	1	1	1	1	1	1
1594	2019	2019-06-14	12	Secondary	POST	Girl		1	1	1	1	1	1	1	0.875
1595	2019	2019-06-14	13	Secondary	POST	Girl	1	1	1	1	1	1	1	1	1
1596	2019	2019-06-14	12	Secondary	POST	Boy	1	1	1	1	1	1	1	1	1
1597	2019	2019-06-14	12	Secondary	POST	Girl	1	1	0	1	1	1	1	1	0.875
1598	2019	2019-06-14	13	Secondary	POST	Girl	1	1	1	1	1	1	0	1	0.875
1599	2019	2019-06-14	12	Secondary	POST	Girl	1	1	1	1	1	1	1	1	1
1600	2019	2019-06-14	13	Secondary	POST	Boy	1	1	1	1	1	1	1	1	1
1601	2019	2019-06-14	13	Secondary	POST	Girl	1	1	1	1	1	1	1	1	1
1602	2019	2019-06-14	13	Secondary	POST	Girl	1	1	1	1	1	1	1	1	1
1603	2019	2019-06-14	13	Secondary	POST	Boy	1	0	1	1	1	0	0	1	0.625
1604	2019	2019-06-14	13	Secondary	POST	Boy	1		1	1	1	1	0	0	0.625
1605	2019	2019-06-14	13	Secondary	POST	Girl	1	0	1	1	1	1	0	1	0.75
1606	2019	2019-06-14	12	Secondary	POST	Girl	1	1	1	1	1	1	0	1	0.875
1607	2019	2019-06-14	12	Secondary	POST	Boy	1	1	0		1	0	0	0	0.375
1608	2019	2019-06-14	12	Secondary	POST	Boy	1	1	1	1	1	1	0	1	0.875
1609	2019	2019-06-14	13	Secondary	POST	Girl	1	1	1	1	1	1	0	1	0.875
1610	2019	2019-06-14	13	Secondary	POST	Girl	1	1	1	1	1	1	0	1	0.875
1611	2019	2019-06-14	12	Secondary	POST	Girl	1	1	1	1	1	1	1	1	1
1612	2019	2019-06-14	12	Secondary	POST	Girl	1	1	1	1	1	1	1	1	1
1613	2019	2019-06-14	13	Secondary	POST	Girl	1	1	1	1	1	1		1	0.875
1614	2019	2019-06-14	13	Secondary	POST	Girl	1	1	1	1	1	1	1	1	1
1615	2019	2019-06-14	13	Secondary	POST	Boy	1	1	1	1	1	1	0	1	0.875
1616	2019	2019-06-14	12	Secondary	POST	Boy	0	1	1	1	1	1	0	1	0.75
1617	2019	2019-06-14	12	Secondary	POST	Boy	1	1	1	1	1	1	0	1	0.875
1618	2019	2019-06-14	13	Secondary	POST	Girl	1	0	1	1	1	1	0	1	0.75
1619	2019	2019-06-14	14	Secondary	POST	Boy	1	1	1	1	1	1	0	1	0.875
1620	2019	2019-06-14	13	Secondary	POST	Girl	1	1	0	1	1	1	1	1	0.875
1621	2019	2019-06-14	13	Secondary	POST	Boy	1	1	1	1	1	1	0	1	0.875
1622	2019	2019-06-14	13	Secondary	POST	Girl	1	1	1	1	1	1	0	1	0.875
1623	2019	2019-06-14	12	Secondary	POST	Boy	1	0	0	1	1	0		1	0.5
1624	2019	2019-06-14	12	Secondary	POST	Boy	1	1	1	1	1	1	0	1	0.875
1625	2019	2019-06-14	12	Secondary	POST	Girl		0	1	1	1	0	0	1	0.5
1626	2019	2019-06-14	13	Secondary	POST	Girl	1	1	0	1	1	1	1	1	0.875
1627	2019	2019-06-14	12	Secondary	POST	Girl	1	0	1	1	1	0	1	1	0.75
1628	2019	2019-06-14	13	Secondary	POST	Boy	1	1	1	1	1	1	1	1	1
1629	2019	2019-06-14	12	Secondary	POST	Boy	1	1	1	1	1	1	0	1	0.875
1630	2019	2019-06-14	12	Secondary	POST	Girl	1	1	0	1	1	1	0	1	0.75
1631	2019	2019-06-13	14	Secondary	POST	Girl	1	1	1	1	1	1	1	1	1
1632	2019	2019-06-13	15	Secondary	POST	Girl	1	1	1	1	1	1	0	1	0.875
1633	2019	2019-06-13	17	Secondary	POST	Boy	1	1	0	1	0	1	1	1	0.75
1634	2019	2019-06-13	16	Secondary	POST	Boy	1	1	0	1	1	1	0	1	0.75
1635	2019	2019-06-13	15	Secondary	POST	Girl	1	1	1	1	1	1	1	1	1
1636	2019	2019-06-13	15	Secondary	POST	Girl	1	1	1	1	1	1	1	1	1
1637	2019	2019-06-13	15	Secondary	POST	Girl	1	1	1	1	1	1	1	1	1
1638	2019	2019-06-13	15	Secondary	POST	Girl	1	1	1	1	1	1	1	1	1
1639	2019	2019-06-13	15	Secondary	POST	Girl	1	1	0	1	1	1	1	1	0.875
1640	2019	2019-06-13	14	Secondary	POST	Girl	1	0	1		1	0	0	0	0.375
1641	2019	2019-06-13	15	Secondary	POST	Boy	1	1	1	1	1	1	1	1	1
1642	2019	2019-06-13	14	Secondary	POST	Boy	1	1	0	1	1	1	1	1	0.875
1643	2019	2019-06-13	14	Secondary	POST	Girl	1	1	1	1	1	1	1	1	1
1644	2019	2019-06-13	15	Secondary	POST	Girl	1	1	1	1	1	0	1	1	0.875
1645	2019	2019-06-13	14	Secondary	POST	Girl	1	1	1	1	1	1	1	1	1
1646	2019	2019-06-13	15	Secondary	POST	Boy	1	0	1	1	1	0	0	1	0.625
1647	2019	2019-06-13	15	Secondary	POST	Girl	1	1	1	1	1	1	1	1	1
1648	2019	2019-06-13	14	Secondary	POST	Girl	1	1	1	1	1	1	0	1	0.875
1649	2019	2019-06-13	15	Secondary	POST	Boy	1	1	0	1	1	1	1	1	0.875
1650	2019	2019-06-13	14	Secondary	POST	Boy	1	1	0	1	1	1	1	1	0.875
1651	2019	2019-06-13	14	Secondary	POST	Girl	1	1	1	1	1	1	1	1	1
1652	2019	2019-06-13	15	Secondary	POST	Girl	1	1	1	1	1	1	1	1	1
1653	2019	2019-06-13	14	Secondary	POST	Girl	1	1	1	1	1	1	1	1	1
1654	2019	2019-06-13	15	Secondary	POST	Boy	1	1	0	1	1	1	1	1	0.875
1655	2019	2019-06-13	15	Secondary	POST	Girl	1	1	1	1	1	1	1	1	1
1656	2019	2019-06-13	16	Secondary	POST	Boy	1	1	0	1	0	1	1	1	0.75
