# Supplementary material for: The impact of sanctuary visits on children’s knowledge and attitudes toward primate welfare and conservation
Source: PeerJ. 2023 Jun 16;11:e15074. doi: 10.7717/peerj.15074 (PMC10284066; doi:10.7717/peerj.15074)
Supplement: Supplemental Information 3 [file peerj-11-15074-s003.xlsx]

## Sheet: Knowledge_Assessment
Subject	Year	Date	Age	Grade	Condiction_EEA	Sex	Question_1	Question_2	Question_3	Question_4	Question_5	Question_6	Question_7	Question_8	Proportion_correct
1	2019	2019-03-05	8	Primary	PRE	Boy	0	0	0	0	1	0	0	1	0.25
2	2019	2019-03-05	9	Primary	PRE	Girl	0	1	1	1	0	0	1	0	0.5
3	2019	2019-03-05	8	Primary	PRE	Girl	0	1	0	1	1	1	1	0	0.625
4	2019	2019-03-05	8	Primary	PRE	Girl	1	1	1	1	1	1	0	0	0.75
5	2019	2019-03-05	8	Primary	PRE	Girl	0	1	0	1	0	0	0	0	0.25
6	2019	2019-03-05	9	Primary	PRE	Boy	0	1	1	0	1	0	1	1	0.625
7	2019	2019-03-05	8	Primary	PRE	Girl	1	0	1	1	0	0	0	1	0.5
8	2019	2019-03-05	8	Primary	PRE	Boy	0	0	1	0	0	0	1	0	0.25
9	2019	2019-03-05	8	Primary	PRE	Boy	0	1	1	0	0	0	1	0	0.375
10	2019	2019-03-05	8	Primary	PRE	Girl	1	1	1	0	0	1	0	0	0.5
11	2019	2019-03-05	9	Primary	PRE	Girl	0	1	0	1	0	0	0	0	0.25
12	2019	2019-03-05	9	Primary	PRE	Boy	1	1	1	1	1	0	0	0	0.625
13	2019	2019-03-05	8	Primary	PRE	Boy	0	1	1	0	1	0	1	1	0.625
14	2019	2019-03-05	8	Primary	PRE	Boy	1	1	1	1	0	0	1	1	0.75
15	2019	2019-03-05	8	Primary	PRE	Boy	1	1	1	0	0	1	0	0	0.5
16	2019	2019-03-05	8	Primary	PRE	Girl	0	1	0	1	1	1	0	0	0.5
17	2019	2019-03-05	8	Primary	PRE	Boy	0	1	1	0	0	0	1	0	0.375
18	2019	2019-03-05	8	Primary	PRE	Boy	1	1	1	0	1	0	1	0	0.625
19	2019	2019-03-05	8	Primary	PRE	Girl	0	1	0	1	0	0	0	0	0.25
20	2019	2019-03-05	9	Primary	PRE	Girl	0	1	0	1	0	0	1	1	0.5
21	2019	2019-03-05	8	Primary	POST	Girl	1	1	1	0	0	1	1	0	0.625
22	2019	2019-03-05	8	Primary	POST	Boy	1	1	1	0	1	1	0	0	0.625
23	2019	2019-03-05	8	Primary	POST	Boy	1	1	1	1	0	1	1	1	0.875
24	2019	2019-03-05	8	Primary	POST	Girl	1	1	1	0	1	1	0	1	0.75
25	2019	2019-03-05	9	Primary	POST	Boy	1	1	1	0	0	0	1	1	0.625
26	2019	2019-03-05	9	Primary	POST	Girl	1	1	1	0	0	1	1	1	0.75
27	2019	2019-03-05	9	Primary	POST	Boy	1	0	1	0	1	0	0	1	0.5
28	2019	2019-03-05	8	Primary	POST	Girl	1	1	1	0	0	0	0	1	0.5
29	2019	2019-03-05	8	Primary	POST	Boy	1	1	1	1	0	1	0	1	0.75
30	2019	2019-03-05	7	Primary	POST	Boy	1	1	1	1	0	1	1	1	0.875
31	2019	2019-03-05	9	Primary	POST	Girl	1	1	0	0	1	1	1	1	0.75
32	2019	2019-03-05	8	Primary	POST	Boy	1	1	1	1	0	1	0	1	0.75
33	2019	2019-03-05	8	Primary	POST	Girl	1	1	1	1	1	1	0	1	0.875
34	2019	2019-03-05	8	Primary	POST	Boy	1	1	0	1	0	0	0	1	0.5
35	2019	2019-03-05	9	Primary	POST	Girl	0	1	1	1	0	1	0	0	0.5
36	2019	2019-03-05	9	Primary	POST	Boy	1	1	1	1	0	1	1	0	0.75
37	2019	2019-03-05	8	Primary	POST	Girl	1	1	1	0	1	1	0	0	0.625
38	2019	2019-03-05	8	Primary	POST	Girl	1	1	1	1	0	1	0	0	0.625
39	2019	2019-03-07	13	Secondary	PRE	Girl	1	1	1	1	0	0	0	0	0.5
40	2019	2019-03-07	12	Secondary	PRE	Boy	1	1	1	1	0	0	1	1	0.75
41	2019	2019-03-07	12	Secondary	PRE	Boy	1	1	1	0	0	0	0	0	0.375
42	2019	2019-03-07	12	Secondary	PRE	Girl	1	1	1	1	0	0	0	0	0.5
43	2019	2019-03-07	12	Secondary	PRE	Boy	1	1	1	0	0	0	0	1	0.5
44	2019	2019-03-07	12	Secondary	PRE	Girl	0	1	1	0	0	1	0	0	0.375
45	2019	2019-03-07	12	Secondary	PRE	Girl	1	1	1	1	0	0	0	0	0.5
46	2019	2019-03-07	13	Secondary	PRE	Girl	1	1	1	1	0	1	0	1	0.75
47	2019	2019-03-07	13	Secondary	PRE	Boy	1	1	1	0	0	1	0	0	0.5
48	2019	2019-03-07	12	Secondary	PRE	Boy	1	1	1	0	0	0	1	0	0.5
49	2019	2019-03-07	13	Secondary	PRE	Boy	1	0	1	0	0	1	0	0	0.375
50	2019	2019-03-07	12	Secondary	PRE	Girl	0	1	1	0	1	1	0	0	0.5
51	2019	2019-03-07	12	Secondary	PRE	Girl	0	0	1	1	0	1	0	1	0.5
52	2019	2019-03-07	12	Secondary	PRE	Boy	1	1	1	1	1	1	1		0.875
53	2019	2019-03-07	12	Secondary	PRE	Boy	1	1	1	0	0	0	1	0	0.5
54	2019	2019-03-07	12	Secondary	PRE	Girl	0	1	1	0	0	1	0	1	0.5
55	2019	2019-03-07	12	Secondary	PRE	Girl	1	1	1	1	1	0	0	0	0.625
56	2019	2019-03-07	12	Secondary	PRE	Boy	1	1	1	1	0	1	1	0	0.75
57	2019	2019-03-07	13	Secondary	PRE	Boy	1	1	1	0	0	0	0	0	0.375
58	2019	2019-03-07	12	Secondary	PRE	Girl	1	1	1	1	0	0	0	0	0.5
59	2019	2019-03-07	13	Secondary	PRE	Girl	1	1	1	1	0	1	0	0	0.625
60	2019	2019-03-07	12	Baccalaureate	PRE	Girl	1	1	1	1	0	0	0		0.5
61	2019	2019-03-07	12	Secondary	PRE	Girl	1	1	1	1	0	0	1	0	0.625
62	2019	2019-03-07	13	Secondary	PRE	Boy	1	1	1	1	0	0	0	1	0.625
63	2019	2019-03-07	13	Secondary	PRE	Girl	0	1	1	0	0	0	1	0	0.375
64	2019	2019-03-07	12	Secondary	PRE	Boy	1	1	1	0	0	0	0		0.375
65	2019	2019-03-07	13	Secondary	PRE	Boy	1	1	1	1	0	1	1	0	0.75
66	2019	2019-03-07	13	Secondary	PRE	Boy	1	1	1	1	1	0	0	0	0.625
67	2019	2019-03-07	12	Secondary	PRE	Boy	1	1	1	1	1	0	0	1	0.75
68	2019	2019-03-07	13	Secondary	PRE	Boy	1	1	1	1	1	1	0	1	0.875
69	2019	2019-03-07	13	Secondary	PRE	Boy	1	1	1	1	1	0	1	1	0.875
70	2019	2019-03-07	12	Secondary	PRE	Boy	1	1	1	1	0	0	1	0	0.625
71	2019	2019-03-07	13	Secondary	PRE	Boy	1	1	1	1	0	0	1	1	0.75
72	2019	2019-03-07	12	Secondary	PRE	Boy	1	1	1	1	1	0	0	1	0.75
73	2018	2018-04-04	16	Baccalaureate	POST	Girl	1	1	1	1	1	1	0	1	0.875
74	2018	2018-04-04	17	Baccalaureate	POST	Girl	1	1	1	1	1	1	0	1	0.875
75	2018	2018-04-04	16	Baccalaureate	POST	Girl	1	1	1	1	1	1	0	1	0.875
76	2018	2018-04-04	17	Baccalaureate	POST	Girl	1	1	1	1	0	0	0	1	0.625
77	2018	2018-04-04	16	Baccalaureate	POST	Boy	0	1	1	1	1	1	0	1	0.75
78	2018	2018-04-04	16	Baccalaureate	POST	Girl	1	1	1	1	0	0	0	0	0.5
79	2018	2018-04-04	16	Baccalaureate	POST	Girl	1	1	1	1	0	0	0	0	0.5
80	2018	2018-04-04	16	Baccalaureate	POST	Boy	1	1	1	1	0	0	0	1	0.625
81	2018	2018-04-04	17	Baccalaureate	POST	Girl	1	1	1	1	0	0	0	1	0.625
82	2018	2018-04-04	17	Baccalaureate	POST	Girl	0	1	1	1	0	0	0	1	0.5
83	2018	2018-04-04	16	Baccalaureate	POST	Girl	1	1	1	1	1	1	0	1	0.875
84	2018	2018-04-04	16	Baccalaureate	POST	Girl	1	1	1	1	1	1	0	1	0.875
85	2018	2018-04-04	16	Baccalaureate	POST	Girl	1	1	1	1	0	0	0	1	0.625
86	2018	2018-04-04	16	Baccalaureate	POST	Girl	1	1	1	1	0	0	0	0	0.5
87	2018	2018-04-04	16	Baccalaureate	POST	Girl	1	1	1	1	0	0	0	1	0.625
88	2018	2018-04-04	16	Baccalaureate	POST	Boy	1	1	1	1	0	1	0	1	0.75
89	2018	2018-04-17	16	Baccalaureate	PRE	Boy	0	1	1	1	0	1	0	1	0.625
90	2018	2018-04-17	17	Baccalaureate	PRE	Boy	1	1	1	1	0	1	0	1	0.75
91	2018	2018-04-17	17	Baccalaureate	PRE	Boy	0	1	1	1	0	0	0	0	0.375
92	2018	2018-04-17	17	Baccalaureate	PRE	Boy	1	1	1	1	0	0	1	0	0.625
93	2018	2018-04-17	16	Baccalaureate	PRE	Girl	1	1	1	1	0	0	1	1	0.75
94	2018	2018-04-17	16	Baccalaureate	PRE	Boy	1	1	1	1	0	0	1	1	0.75
95	2018	2018-04-17	16	Baccalaureate	PRE	Boy	0	1	1	1	0	1	0	0	0.5
96	2018	2018-04-17	17	Baccalaureate	PRE	Boy	1	1	1	1	0	0	1	0	0.625
97	2018	2018-04-17	16	Baccalaureate	PRE	Girl	0	1	1	1	0	0	0	1	0.5
98	2018	2018-04-17	17	Baccalaureate	PRE	Girl	1	1	1	1	0	0	1	0	0.625
99	2018	2018-04-17	16	Baccalaureate	PRE	Girl	0	1	1	1	0	0	0	1	0.5
100	2018	2018-04-17	17	Baccalaureate	PRE	Girl	1	1	1	1	1	0	1	0	0.75
101	2018	2018-04-17	16	Baccalaureate	PRE	Boy	1	1	1	1	0	1	0	0	0.625
102	2018	2018-04-17	16	Baccalaureate	PRE	Boy	0	1	1	0	0	0	0	0	0.25
103	2018	2018-04-20	12	Secondary	PRE	Girl	0	1	1	0	0	0	0	0	0.25
104	2018	2018-04-20	13	Secondary	PRE	Boy	0	1	1	1	1	1	0	0	0.625
105	2018	2018-05-08	12	Secondary	PRE	Girl	0	1	1	1	1	0	0	0	0.5
106	2018	2018-05-08	12	Secondary	PRE	Boy	0	1	1	0	0	0	1	0	0.375
107	2018	2018-05-08	13	Secondary	PRE	Girl	0	1	1	0	0	0	0	1	0.375
108	2018	2018-05-08	12	Secondary	PRE	Boy	0	1	0	0	0	0	1	0	0.25
109	2018	2018-05-08	12	Secondary	PRE	Boy	0	1	1	1	1	1	0	0	0.625
110	2018	2018-05-08	12	Secondary	PRE	Boy	0	1	1	0	0	0	0	0	0.25
111	2018	2018-05-08	12	Secondary	PRE	Girl	0	1	1	0	1	1	0	1	0.625
112	2018	2018-05-08	12	Secondary	PRE	Boy	1	1	0	1	1	1	1	0	0.75
113	2018	2018-05-08	12	Secondary	PRE	Girl	1	1	1	0	1	1	0	0	0.625
114	2018	2018-05-08	13	Secondary	PRE	Boy	1	1	0	0	1	1	0	0	0.5
115	2018	2018-05-08	12	Secondary	PRE	Girl	1	1	1	1	0	0	0	0	0.5
116	2018	2018-05-08	13	Secondary	PRE	Boy	0	1	1	0	0	1	1		0.5
117	2018	2018-05-08	12	Secondary	PRE	Boy	0	1	1	0	0	1	1	0	0.5
118	2018	2018-05-08	12	Secondary	PRE	Girl	0	1	1	1	1	1	0	0	0.625
119	2018	2018-05-08	12	Secondary	PRE	Boy	1	1	0	0	1	1	0	0	0.5
120	2018	2018-05-08	12	Secondary	PRE	Girl	1	1	1	1	0	1	0	0	0.625
121	2018	2018-05-08	12	Secondary	PRE	Girl	0	1	0	1	0	1	0	0	0.375
122	2018	2018-05-08	13	Secondary	PRE	Girl	1	1	1	1	0	1	0	0	0.625
123	2018	2018-05-08	13	Secondary	PRE	Boy	1	1	1	0	1	0	1	0	0.625
124	2018	2018-05-08	12	Secondary	PRE	Boy	0	1	1	0	0	0	0	0	0.25
125	2018	2018-05-08	13	Secondary	PRE	Boy	0	1	1	0	0	1	0	0	0.375
126	2018	2018-05-08	12	Secondary	PRE	Boy	0	1	1	1	0	0	0	1	0.5
127	2018	2018-05-08	12	Secondary	PRE	Boy	1	1	1	0	0	0	0	0	0.375
128	2018	2018-05-08	13	Secondary	PRE	Boy	0	1	1	1	0	0	0	0	0.375
129	2018	2018-05-08	13	Secondary	PRE	Boy	1	1	1	0	0	1	0	0	0.5
130	2018	2018-05-08	13	Secondary	PRE	Girl	0	1	1	0	1	1	0	0	0.5
131	2018	2018-05-08	13	Secondary	PRE	Girl	0	1	0	0	0	0	0	0	0.125
132	2018	2018-05-08	12	Secondary	PRE	Girl	0	1	0	1	0	1	0	0	0.375
133	2018	2018-05-08	13	Secondary	PRE	Girl	0	1	1	0	1	1	0	0	0.5
134	2018	2018-05-08	12	Secondary	PRE	Girl	0	1	0	1	1	1	0	1	0.625
135	2018	2018-05-08	12	Secondary	PRE	Girl	1	1	1	0	0	1	0	0	0.5
136	2018	2018-05-09	12	Secondary	POST	Girl	1	1	1	1	1	1	0	1	0.875
137	2018	2018-05-09	12	Secondary	POST	Boy	0	1	1	0	1	0	1	0	0.5
138	2018	2018-05-09	12	Secondary	POST	Girl	1	1	1	1	0	1	0	0	0.625
139	2018	2018-05-09	12	Secondary	POST	Girl	1	1	1	1	1	1	0	1	0.875
140	2018	2018-05-09	13	Secondary	POST	Boy	0	1	1	1	1	1	1	1	0.875
141	2018	2018-05-09	12	Secondary	POST	Girl	1	1	1	1	0	1	0	0	0.625
142	2018	2018-05-09	12	Secondary	POST	Girl	0	1	1	1	0	1	0	1	0.625
143	2018	2018-05-09	12	Secondary	POST	Boy	1	1	1	1	0	1	0	0	0.625
144	2018	2018-05-09	12	Secondary	POST	Girl	1	1	1	1	0	0	0	0	0.5
145	2018	2018-05-09	12	Secondary	POST	Girl	1	1	1	1	0	1	0	0	0.625
146	2018	2018-05-09	13	Secondary	POST	Girl	1	1	0	1	0	1	0	1	0.625
147	2018	2018-05-09	12	Secondary	POST	Girl	0	1	1	1	1	1	0	1	0.75
148	2018	2018-05-09	12	Secondary	POST	Girl	1	1	1	1	0	1	0	0	0.625
149	2018	2018-05-09	13	Secondary	POST	Boy	0	1	1	1	0	1	0	1	0.625
150	2018	2018-05-09	12	Secondary	POST	Boy	0	1	1	1	0	1	1	0	0.625
151	2018	2018-05-09	13	Secondary	POST	Girl	0	1	1	1	0	1	0	0	0.5
152	2018	2018-05-09	12	Secondary	POST	Boy	1	1	1	1	0	1	0	1	0.75
153	2018	2018-05-09	12	Secondary	POST	Girl	0	1	1	1	1	1	0	1	0.75
154	2018	2018-05-09	12	Secondary	POST	Boy	0	1	0	1	0	1	0	1	0.5
155	2018	2018-05-09	13	Secondary	POST	Girl	1	1	1	1	1	1	0	1	0.875
156	2018	2018-05-09	12	Secondary	POST	Boy	1	1	0	1	0	1	0	1	0.625
157	2018	2018-05-09	12	Secondary	POST	Boy	1	1	1	1	0	1	1	1	0.875
158	2018	2018-05-09	13	Secondary	POST	Boy	1	1	1	1	0	1	0	1	0.75
159	2018	2018-05-09	13	Secondary	POST	Boy	1	1	0	1	0	1	0	1	0.625
160	2018	2018-05-09	12	Secondary	POST	Boy	0	1	1	1	0	1	1	1	0.75
161	2018	2018-05-09	12	Secondary	POST	Boy	1	1	0	0	0	1	0	0	0.375
162	2018	2018-05-09	12	Secondary	POST	Boy	1	1	1	1	0	1	0	1	0.75
163	2018	2018-05-09	13	Secondary	POST	Boy	1	1	1	1	0	1	1	0	0.75
164	2018	2018-05-09	12	Secondary	POST	Boy	0	1	1	1	1	1	1	0	0.75
165	2018	2018-05-09	13	Secondary	POST	Boy	1	1	1	1	0	1	1	1	0.875
166	2018	2018-05-09	12	Secondary	POST	Boy	0	1	0	1	0	1	0	0	0.375
167	2018	2018-05-16	11	Primary	PRE	Girl	1	1	1	1	1	1	0	1	0.875
168	2018	2018-05-16	11	Primary	PRE	Boy	1	1	1	1	1	1	1	1	1
169	2018	2018-05-16	11	Primary	PRE	Boy	1	1	1	1	1	1	0	0	0.75
170	2018	2018-05-16	11	Primary	PRE	Boy	1	1	1	1	1	1	0	0	0.75
171	2018	2018-05-16	12	Primary	PRE	Girl	0	1	1	1	1	0	0	0	0.5
172	2018	2018-05-16	12	Primary	POST	Girl	1	1	1	1	0	1	0	1	0.75
173	2018	2018-05-16	12	Primary	POST	Girl	1	1	1	1	0	1	0	1	0.75
174	2018	2018-05-16	13	Primary	POST	Boy	1	1	1	1	1	1	0	1	0.875
175	2018	2018-05-16	12	Primary	POST	Girl	1	1	1	1	0	1	0	1	0.75
176	2018	2018-05-16	12	Primary	POST	Girl	1	1	1	1	0	1	0	1	0.75
177	2018	2018-05-16	11	Primary	POST	Girl	1	1	0	1	0	1	0	1	0.625
178	2018	2018-05-16	12	Primary	POST	Girl	1	1	0	1	0	1	0	1	0.625
179	2018	2018-05-16	11	Primary	POST	Girl	1	1	1	1	0	1	0	1	0.75
180	2018	2018-05-16	12	Primary	POST	Boy	1	1	1	1	0	1	0	1	0.75
181	2018	2018-05-16	11	Primary	POST	Boy	1	1	1	1	0	1	0	1	0.75
182	2018	2018-05-16	12	Primary	POST	Girl	1	1	1	1	1	1	0	1	0.875
183	2018	2018-05-16	12	Primary	POST	Girl	1	1	1	1	1	1	0	1	0.875
184	2018	2018-05-16	12	Primary	POST	Girl	1	1	1	0	1	1	0	1	0.75
185	2018	2018-05-16	12	Primary	POST	Boy	1	1	1	1	0	1	0	1	0.75
186	2018	2018-05-16	11	Primary	POST	Boy	1	1	1	1	0	1	0	1	0.75
187	2018	2018-05-16	11	Primary	POST	Girl	1	1	1	1	1	1	0	1	0.875
188	2018	2018-05-16	11	Primary	POST	Girl	1	1	1	1	1	1	0	1	0.875
189	2018	2018-05-16	11	Primary	POST	Girl	0	1	1	1	1	1	0	0	0.625
190	2018	2018-05-16	11	Primary	POST	Girl	1	1	1	1	0	1	0	1	0.75
191	2018	2018-05-16	11	Primary	POST	Girl	1	1	1	1	0	1	0	0	0.625
192	2018	2018-05-16	12	Primary	POST	Girl	0	1	1	1	0	1	0	1	0.625
193	2018	2018-05-17	9	Primary	PRE	Boy	0	1	0	0	1	0	1	0	0.375
194	2018	2018-05-17	8	Primary	PRE	Boy	0	1	1	0	0	0	0	0	0.25
195	2018	2018-05-17	9	Primary	PRE	Boy	1	1	1	0	1	0	1	0	0.625
196	2018	2018-05-17	9	Primary	PRE										0
197	2018	2018-05-17	8	Primary	PRE	Boy	1	1	1	0	1	1	0	0	0.625
198	2018	2018-05-17	9	Primary	PRE	Boy	0	1	0	1	1	0	1	0	0.5
199	2018	2018-05-17	9	Primary	PRE	Boy	1	1	1	0	0	0	1	0	0.5
200	2018	2018-05-17	8	Primary	PRE	Girl	1	1	1	1	1	0	0	1	0.75
201	2018	2018-05-17	8	Primary	PRE	Girl	0	1	0	1	1	0	0	0	0.375
202	2018	2018-05-17	9	Primary	PRE	Girl	0	1	1	0	0	0	1	0	0.375
203	2018	2018-05-17	9	Primary	PRE	Boy	0	1	0	0	1	0	0	1	0.375
204	2018	2018-05-17	9	Primary	PRE	Girl	1	1	1	1	0	0	0	1	0.625
205	2018	2018-05-17	9	Primary	PRE	Girl	1	1	0	0	1	1	0	1	0.625
206	2018	2018-05-17	8	Primary	PRE	Girl	1	1	1	1	1	1	0	0	0.75
207	2018	2018-05-17	9	Primary	PRE	Boy	0	1	0	1	0	0	1	1	0.5
208	2018	2018-05-17	9	Primary	PRE	Girl	0	1	0	1	1	0	0	0	0.375
209	2018	2018-05-17	8	Primary	PRE	Boy	0	1	1	0	0	0	0	0	0.25
210	2018	2018-05-17	8	Primary	PRE	Girl	1	1	1	1	0	1	0	0	0.625
211	2018	2018-05-17	8	Primary	PRE	Girl	1	1	1	1	1	0	0	0	0.625
212	2018	2018-05-17	9	Primary	PRE	Boy	1	1	0	1	0	0	1	0	0.5
213	2018	2018-05-17	8	Primary	PRE	Boy	0	1	1	0	1	0	1	1	0.625
214	2018	2018-05-17	8	Primary	PRE	Boy	1	1	1	0	1	1	0	1	0.75
215	2018	2018-05-17	9	Primary	PRE	Boy	1	1	1	0	1	1	1	0	0.75
216	2018	2018-05-17	9	Primary	PRE	Girl	1	1	1	1	1	1	0	0	0.75
217	2018	2018-06-04	11	Primary	PRE	Boy	1	1	1	0	0	1	0	1	0.625
218	2018	2018-06-04	10	Primary	PRE	Boy	1	1	1	1	1	1	0	1	0.875
219	2018	2018-06-04	11	Primary	PRE	Girl	0	0	1	1	1	1	0	1	0.625
220	2018	2018-06-04	10	Primary	PRE	Boy	1	1	1	1	1	0	0	0	0.625
221	2018	2018-06-04	11	Primary	PRE	Boy	1	1	1	1	0	1	0	1	0.75
222	2018	2018-06-04	10	Primary	PRE	Girl	0	1	1	1	1	0	0	1	0.625
223	2018	2018-06-04	11	Primary	PRE	Girl	0	1	0	0	0	0	0	1	0.25
224	2018	2018-06-04	10	Primary	PRE	Girl	0	1	1	1	0	0	0	1	0.5
225	2018	2018-06-04	11	Primary	PRE	Girl	0	1	1	0	1	1	0	1	0.625
226	2018	2018-06-04	10	Primary	PRE	Girl	0	1	1	1	0	1	0	1	0.625
227	2018	2018-06-04	11	Primary	PRE	Girl	1	1	1	1	1	1	0	0	0.75
228	2018	2018-06-04	11	Primary	PRE	Girl	0	1	0	1	1	1	0	0	0.5
229	2018	2018-06-04	11	Primary	PRE	Boy	1	1	1	1	1	0	0	0	0.625
230	2018	2018-06-04	10	Primary	PRE	Girl	0	1	1	1	1	1	0	1	0.75
231	2018	2018-06-04	10	Primary	PRE	Girl	0	0	1	1	1	0	1	1	0.625
232	2018	2018-06-04	10	Primary	PRE	Boy	0	1	0	0	0	0	1	0	0.25
233	2018	2018-06-04	15	Primary	PRE	Girl	1	1	1	0	0	0	0	0	0.375
234	2018	2018-06-14	14	Secondary	PRE	Boy	0	0	1	0	0	0	0	0	0.125
235	2018	2018-06-14	14	Secondary	PRE	Girl	1	1	1	1	1	1	0	0	0.75
236	2018	2018-06-14	15	Secondary	PRE	Girl	1	1	1	0	0	1	0	0	0.5
237	2018	2018-06-14	14	Secondary	PRE	Girl	1	1	1	0	0	1	0	1	0.625
238	2018	2018-06-14	15	Secondary	PRE	Girl	0	0	1	0	0	1	0	1	0.375
239	2018	2018-06-14	15	Secondary	PRE	Girl	1	1	1	1	0	1	0	0	0.625
240	2018	2018-06-14	14	Secondary	PRE	Girl	0	0	1	1	1	0	0	1	0.5
241	2018	2018-06-14	14	Secondary	PRE	Boy	0	1	1	1	1	1	0	1	0.75
242	2018	2018-06-14	14	Secondary	PRE	Girl	0	0	1	0	0	1	0	1	0.375
243	2018	2018-06-14	14	Secondary	PRE	Girl	0	1	1	1	0	0	0	0	0.375
244	2018	2018-06-14	15	Secondary	PRE	Girl	1	1	1	1	1	1	0	1	0.875
245	2018	2018-06-14	14	Secondary	PRE	Girl	0	1	1	1	0	0	0	1	0.5
246	2018	2018-06-14	14	Secondary	PRE	Girl	1	1	1	1	1	1	0	0	0.75
247	2018	2018-06-14	14	Secondary	PRE	Girl	1	0	1	1	0	1	1	0	0.625
248	2018	2018-06-14	14	Secondary	PRE	Girl	0	1	1	1	1	0	0	0	0.5
249	2018	2018-06-14	13	Secondary	PRE	Boy	0	1	1	0	0	0	0	0	0.25
250	2018	2018-06-14	15	Secondary	PRE	Boy	0	1	1	0	0	0	0	1	0.375
251	2018	2018-06-14	14	Secondary	PRE	Boy	0	1	1	0	0	0	0	1	0.375
252	2018	2018-06-14	15	Secondary	PRE	Boy	0	1	1	0	0	0	0	0	0.25
253	2018	2018-06-14	14	Secondary	PRE	Boy	1	1	1	1	0	0	0	0	0.5
254	2018	2018-06-14	14	Secondary	PRE	Boy	0	1	1	1	0	1	0	1	0.625
255	2018	2018-06-14	14	Secondary	PRE	Boy	0	1	1	0	1	0	0	0	0.375
256	2018	2018-06-14	16	Secondary	PRE	Boy	0	1	1	0	1	0	0	1	0.5
257	2018	2018-06-14	16	Secondary	PRE	Girl	1	1	1	0	1	1	0	1	0.75
258	2018	2018-10-16	14	Secondary	PRE	Girl	0	1	0	1	1	0	0	0	0.375
259	2018	2018-10-16	14	Secondary	PRE	Girl	0	1	0	0	0	1	1	1	0.5
260	2018	2018-10-16	14	Secondary	PRE	Boy	0	1	1	1	0	1	0	0	0.5
261	2018	2018-10-16	14	Secondary	PRE	Boy	1	1	1	1	0	0	0		0.5
262	2018	2018-10-16	14	Secondary	PRE	Boy	0	1	1	1	0	0	0	0	0.375
263	2018	2018-10-16	14	Secondary	PRE	Boy	0	1	1	0	0	0	0	0	0.25
264	2019	2019-02-15	10	Primary	PRE	Boy	0	1	1	0	1	0	0	0	0.375
265	2019	2019-02-15	9	Primary	PRE	Boy	0	1	1	0	1	0	0	1	0.5
266	2019	2019-02-15	10	Primary	PRE	Boy	0	1	0	0	1	0	0	1	0.375
267	2019	2019-02-15	10	Primary	PRE	Boy	0	1	1	0	1	0	0	0	0.375
268	2019	2019-02-15	9	Primary	PRE	Girl	0	1	1	0	0	1	0	0	0.375
269	2019	2019-02-15	9	Primary	PRE	Boy	0	1	1	0	1	0	1	0	0.5
270	2019	2019-02-15	10	Primary	PRE	Boy	0	1	0	1	1	0	0	0	0.375
271	2019	2019-02-15	9	Primary	PRE	Girl	0	1	1	0	1	0	1	1	0.625
272	2019	2019-02-15	9	Primary	PRE	Girl	0	1	0	0	1	0	0	1	0.375
273	2019	2019-02-15	9	Primary	PRE	Girl	0	1	1	0	1	0	1	1	0.625
274	2019	2019-02-15	9	Primary	PRE	Girl	1	1	1	1	1	0	0	0	0.625
275	2019	2019-02-15	9	Primary	PRE	Girl	0	0	0	1	1	1	0	0	0.375
276	2019	2019-02-15	10	Primary	PRE	Girl	0	1	1	0	1	0	0	0	0.375
277	2019	2019-02-15	9	Primary	PRE	Boy	1	1	1	1	0	0	1	1	0.75
278	2019	2019-02-15	9	Primary	PRE	Boy	0		1	1	1	0	0	0	0.375
279	2019	2019-02-15	10	Primary	PRE	Girl	0	1	0	0	1	1	0	1	0.5
280	2019	2019-02-15	9	Primary	PRE	Boy	0	1	1	1	1	0	0	0	0.5
281	2019	2019-02-15	10	Primary	PRE	Boy	0	1	1	1	1	0	0	0	0.5
282	2019	2019-02-15	10	Primary	PRE	Boy	0	1	1	1	1	0	0	1	0.625
283	2019	2019-02-15	10	Primary	PRE	Boy	0	1	1	0	0	0	0	0	0.25
284	2019	2019-02-15	9	Primary	PRE	Boy	1	1	0	0	1	0	1	1	0.625
285	2019	2019-02-15	10	Primary	PRE	Girl	1	1	0	1	1	0	0	1	0.625
286	2019	2019-02-15	9	Primary	PRE	Girl	0	1	0	1	1	0	1	0	0.5
287	2019	2019-03-07	12	Secondary	PRE	Girl	1	1	1	1	0	0	1	0	0.625
288	2019	2019-03-07	12	Secondary	PRE	Girl	1	1	1	1	0	0	1	0	0.625
289	2019	2006-03-04	13	Secondary	PRE	Boy	1	1	1	0	1	1	0	0	0.625
290	2019	2019-03-07	12	Secondary	PRE	Boy	1	1	1	1	1	0	1	1	0.875
291	2019	2019-03-07	12	Secondary	PRE	Girl	1	1	1	1	1	1	0	1	0.875
292	2019	2019-03-07	12	Secondary	PRE	Girl	0			1	1	0	0	0	0.25
293	2019	2019-03-07	12	Secondary	PRE	Boy	1	1	1	1	1	0	1	0	0.75
294	2019	2019-02-07	13	Secondary	PRE	Boy	1	1	1	1	0	1	0	0	0.625
295	2019	2019-03-07	12	Secondary	PRE	Boy	1	1	1	1	1	0	0	1	0.75
296	2019	2019-03-07	12	Secondary	PRE	Boy	1	1	1	1	1	0	0	1	0.75
297	2019	2019-03-07	12	Secondary	PRE	Girl	1	1	1	1	1	1	0	1	0.875
298	2019	2019-03-07	12	Secondary	PRE	Girl	1	1	1	1	1	1	0	1	0.875
299	2019	2019-03-07	12	Secondary	PRE	Boy	1	1	1	1	1	1	0	1	0.875
300	2019	2019-03-07	12	Secondary	PRE	Girl	1	1	1	1	1	1	1	1	1
301	2019	2019-03-07	12	Secondary	PRE	Girl	1	1	1	1	1	1	0	0	0.75
302	2019	2019-03-07	12	Secondary	PRE	Girl	1	1	1	1	1	1	0	0	0.75
303	2019	2019-03-13	11	Primary	PRE	Girl	1	1	1	0	1	0	0	0	0.5
304	2019	2019-03-13	11	Primary	PRE	Girl	0	1	1	1	0	0	0	0	0.375
305	2019	2019-03-13	11	Primary	PRE	Boy	1	1	0	1	0	0	1	0	0.5
306	2019	2019-03-13	12	Primary	PRE	Boy	0	1	0	1	0	1	0	0	0.375
307	2019	2019-03-13	12	Primary	PRE	Boy	1	1	1	0	0	1	0	0	0.5
308	2019	2019-03-13	11	Primary	PRE	Girl	1	0	1	0	1	0	0	1	0.5
309	2019	2019-03-13	12	Primary	PRE	Girl	1	1	1	1	1	0	1	0	0.75
310	2019	2019-03-13	11	Primary	PRE	Girl	1	1	1	0	1	0	1	1	0.75
311	2019	2019-03-13	11	Primary	PRE	Boy	1	1	1	0	0	1	0	0	0.5
312	2019	2019-03-13	11	Primary	PRE	Boy	1	1	1	0	0	0	1	1	0.625
313	2019	2019-03-13	11	Primary	PRE	Boy	1	1	1	0	0	1	1	0	0.625
314	2019	2019-03-13	11	Primary	PRE	Girl	1	1	1	1	1	0	0	1	0.75
315	2019	2019-03-13	11	Primary	PRE	Boy	0	1	1	1	0	0	1	0	0.5
316	2019	2019-03-13	11	Primary	PRE	Boy	1	1	1	0	0	0	1	1	0.625
317	2019	2019-03-13	11	Primary	PRE	Girl	1	1	1	1	0	1	1	0	0.75
318	2019	2019-03-13	11	Primary	PRE	Boy	1	1	1	1	1	0	1	1	0.875
319	2019	2019-03-13	11	Primary	PRE	Girl	1	1	1	1	1	0	0	1	0.75
320	2019	2019-03-13	12	Primary	PRE	Girl	1	1	1	0	0	0	1	0	0.5
321	2019	2019-03-13	13	Primary	PRE	Boy	1	1	0	1	1	0	0	1	0.625
322	2019	2019-03-13	12	Primary	PRE	Boy	1	1	1	0	0	0	1	0	0.5
323	2019	2019-03-13	11	Primary	PRE	Boy	0	1	1	0	1	1	1	0	0.625
324	2019	2019-03-13	11	Primary	PRE	Boy	1		1	1	0	0	0	1	0.5
325	2019	2019-03-13	12	Primary	PRE	Boy	0	1	1	0	1	0	0	1	0.5
326	2019	2019-03-13	11	Primary	PRE	Boy	1	1	1	0	0	0	0	1	0.5
327	2019	2019-03-13	11	Primary	PRE	Girl	1	1	1	0	0	0	0	0	0.375
328	2019	2019-03-13	12	Primary	PRE	Boy	0	1	1	0	1	0	1	1	0.625
329	2019	2019-03-13	12	Primary	PRE	Boy	1	1	1	1	1	0	1	1	0.875
330	2019	2019-03-13	12	Primary	PRE	Boy	1	1	1	0	1	0	0	0	0.5
331	2019	2019-03-13	9	Primary	PRE		0	1	0	0	1	0	0	0	0.25
332	2019	2019-03-13	11	Primary	POST	Boy	1	1	1	1	1	1	0	0	0.75
333	2019	2019-03-13	10	Primary	POST	Girl	1	1	1	0	1	1	0	1	0.75
334	2019	2019-03-13	11	Primary	POST	Girl	1	1	1	0	1	0	0	1	0.625
335	2019	2019-03-13	11	Primary	POST	Boy	1	1	1	0	1	1	0	1	0.75
336	2019	2019-03-13	11	Primary	POST	Boy	1	1	1	0	1	1	0	1	0.75
337	2019	2019-03-13	10	Primary	POST	Girl	1	1	1	0	1	1	0	0	0.625
338	2019	2019-03-13	10	Primary	POST	Girl	1	1	1	1	1	1	1	1	1
339	2019	2019-03-13	11	Primary	POST	Boy	1	1	1	1	0	1	1	1	0.875
340	2019	2019-03-13	10	Primary	POST	Girl	1	1	1	1	1	1	0	1	0.875
341	2019	2019-03-13	10	Primary	POST	Boy	1	1	1	0	1	1	1	0	0.75
342	2019	2019-03-13	10	Primary	POST	Boy	1	1	1	1	0	1	1	1	0.875
343	2019	2019-03-13	11	Primary	POST	Girl	1	1	1	1	1	1	0	1	0.875
344	2019	2019-03-13	10	Primary	POST	Boy	1	1	1	1	1	1	1	1	1
345	2019	2019-03-13	10	Primary	POST	Girl	1	1	1	1	1	1	0	1	0.875
346	2019	2019-03-13	11	Primary	POST	Boy	1	1	1	1	0	1	1	1	0.875
347	2019	2019-03-13	11	Primary	POST	Girl	1	1	1	1	1	1	1	1	1
348	2019	2019-03-13	11	Primary	POST	Boy	1	1	1	1	1	0	1	0	0.75
349	2019	2019-03-13	10	Primary	POST	Girl	0	1	1	0	1	1	0	0	0.5
350	2019	2019-03-13	10	Primary	POST	Boy	0	1	1	1	1	1	0	1	0.75
351	2019	2019-03-13	11	Primary	POST	Boy	1	1	1	1	0	0	0	0	0.5
352	2019	2019-03-13	10	Primary	POST	Boy	1	1	1	1	1	1	0	1	0.875
353	2019	2019-03-13	10	Primary	POST	Boy	1	1	1	0	0	1	0	0	0.5
354	2019	2019-03-13	11	Primary	POST	Boy	1	1	1	1	1	1	0	1	0.875
355	2018	2018-03-14	10	Primary	PRE	Boy	0	1	1	1	1	1	0	1	0.75
356	2018	2018-03-14	10	Primary	PRE	Boy	0	1	1	0	1	0	1	0	0.5
357	2018	2018-03-14	10	Primary	PRE	Boy	1	1	0	0	0	1	1	1	0.625
358	2018	2018-03-14	10	Primary	PRE	Girl	1	1	1	1	0	1	1	0	0.75
359	2018	2018-03-14	10	Primary	PRE	Boy	0	1	0	1	0	0	1	0	0.375
360	2018	2018-03-14	10	Primary	PRE	Boy	1	1	1	0	1	0	0	1	0.625
361	2018	2018-03-14	10	Primary	PRE	Boy	0	1	0	1	1	0	1	0	0.5
362	2018	2018-03-14	10	Primary	PRE	Girl	1	1	1	1	1	1	0	1	0.875
363	2018	2018-03-14	10	Primary	PRE	Boy	1	1	1	0	1	1	0	0	0.625
364	2018	2018-03-14	10	Primary	PRE	Boy	1	1	0	1	1	1	1	0	0.75
365	2018	2018-03-14	10	Primary	PRE	Boy	0	1	1	0	1	1	0	1	0.625
366	2018	2018-03-14	10	Primary	PRE	Girl	1	1	1	1	1	0	0	1	0.75
367	2018	2018-03-14	11	Primary	PRE	Boy	1	1	1	0	1	1	0	1	0.75
368	2018	2018-03-14	10	Primary	PRE	Boy	0	1	1	0	0	0	0	0	0.25
369	2018	2018-03-14	10	Primary	PRE	Girl	0	1	1	0	1	1	0	0	0.5
370	2018	2018-03-14	11	Primary	PRE	Girl	1	1	0	1	1	1	0	1	0.75
371	2018	2018-03-14	10	Primary	PRE	Girl	1	1	1	1	1	1	1	1	1
372	2018	2018-03-14	10	Primary	PRE	Boy	1	1	1	1	1	1	0	0	0.75
373	2018	2018-03-14	11	Primary	PRE	Girl	0	1	1	0	1	1	0	0	0.5
374	2018	2018-03-14	10	Primary	PRE	Girl	1	1	1	1	1	0	0	0	0.625
375	2018	2018-03-14	10	Primary	PRE	Girl	0	1	0	0	1	1	0	0	0.375
376	2018	2018-03-14	10	Primary	PRE	Girl	1	1	1	1	1	1	1	0	0.875
377	2018	2018-03-14	10	Primary	PRE	Girl	1	1	1	0	0	0	0	0	0.375
378	2018	2018-03-14	10	Primary	PRE	Boy	0	1	1	1	1	1	0	0	0.625
379	2018	2018-03-14	10	Primary	PRE	Boy	0	1	1	1	1	1		1	0.75
380	2018	2018-03-14	10	Primary	POST	Boy	1	1	1	1	1	1	0	0	0.75
381	2018	2018-03-14	11	Primary	POST	Girl	1	1	1	1	1	1	1	1	1
382	2018	2018-03-14	11	Primary	POST	Boy	1	1	1	0	1	1	0	0	0.625
383	2018	2018-03-14	11	Primary	POST	Boy	1	1	1	1	1	1	0	0	0.75
384	2018	2018-03-14	10	Primary	POST	Boy	0	1	1	1	1	1	0	0	0.625
385	2018	2018-03-14	10	Primary	POST	Boy	0	1	1	1	1	1	0	1	0.75
386	2018	2018-03-14	10	Primary	POST	Boy	0	1	0	1	0	1	1	0	0.5
387	2018	2018-03-14	10	Primary	POST	Girl	1	1	0	1	1	1	0	1	0.75
388	2018	2018-03-14	10	Primary	POST	Boy	1	1	0	1	1	1	0	0	0.625
389	2018	2018-03-14	10	Primary	POST	Boy	1	1	1	1	1	1	1	1	1
390	2018	2018-03-14	10	Primary	POST	Boy	0	1	1	1	1	1	0	1	0.75
391	2018	2018-03-14	10	Primary	POST	Boy	1	1	1	0	0	1	1	0	0.625
392	2018	2018-03-14	10	Primary	POST		1	1	1	0	0	1	0	1	0.625
393	2018	2018-03-14	10	Primary	POST	Girl	1	1	1	0	1	1	1	1	0.875
394	2018	2018-03-14	11	Primary	POST	Boy	1	1	1	1	0	1	1	1	0.875
395	2018	2018-03-14	10	Primary	POST	Girl	1	1	1	1	0	1	1	1	0.875
396	2018	2018-03-14	10	Primary	POST	Girl	1	1	1	1	1	1	0	1	0.875
397	2018	2018-03-14	10	Primary	POST	Girl	1	0	1	1	0	1	0	1	0.625
398	2018	2018-03-14	11	Primary	POST	Girl	1	1	1	1	0	1	0	1	0.75
399	2018	2018-03-14	11	Primary	POST	Girl	0	1	1	0	1	1	0	0	0.5
400	2018	2018-03-14	11	Primary	POST	Boy	1	1	1	1	1	1	0	1	0.875
401	2018	2018-03-14	10	Primary	POST	Girl	1	1	1	0	1	1	0	0	0.625
402	2018	2018-03-14	10	Primary	POST	Boy	0	1	1	0	1	1	1	1	0.75
403	2018	2018-03-14	10	Primary	POST	Boy	0	1	1	1	0	1	0	0	0.5
404	2018	2018-03-15	12	Secondary	PRE	Boy	0	1	1	1	1	0	1	1	0.75
405	2018	2018-03-15	13	Secondary	PRE	Boy	0	1	1	1	1	0	0	0	0.5
406	2018	2018-03-15	12	Secondary	PRE	Girl	0	1	1	1	0	0	0	0	0.375
407	2018	2018-03-15	13	Secondary	PRE	Girl	0	1	1	1	0	0	0	0	0.375
408	2018	2018-03-15	12	Secondary	PRE	Girl	1	1	1	1	0	1	0	0	0.625
409	2019	2019-04-01	12	Secondary	PRE	Girl	1	1	1	0	1	0	1	0	0.625
410	2019	2019-04-01	13	Secondary	PRE	Girl	0	1	0	1	1	1	0	1	0.625
411	2019	2019-04-01	12	Secondary	PRE	Boy	0	1	1	1	1	1	0	0	0.625
412	2019	2019-04-01	12	Secondary	PRE	Girl	1	1	1	1	1	0	0	0	0.625
413	2019	2019-04-01	13	Secondary	PRE	Girl	0	1	1	1	0	0	0	0	0.375
414	2019	2019-04-01	12	Secondary	PRE	Girl	0	1	1	1	0	0	1	0	0.5
415	2019	2019-04-01	12	Secondary	PRE	Boy	1	1	1	1	1	0	0	1	0.75
416	2019	2019-04-01	12	Secondary	PRE	Girl	0	1	1	1	0	0	1	0	0.5
417	2019	2019-04-01	12	Secondary	PRE	Girl	1	1	1	1	1	1	0	0	0.75
418	2019	2019-04-01	13	Secondary	PRE	Boy	0	1	1	1	1	0	0	0	0.5
419	2019	2019-04-01	12	Secondary	PRE	Girl	0	1	1	1	1	0	0	0	0.5
420	2019	2019-04-01	13	Secondary	PRE	Girl	0	1	1	1	0	0	0	1	0.5
421	2019	2019-04-01	12	Secondary	PRE	Boy	0	1	1	1	0	0	0	0	0.375
422	2019	2019-04-01	12	Secondary	PRE	Boy	0	1	1	1	1	1	0	1	0.75
423	2019	2019-04-01	13	Secondary	PRE	Girl	0	1	0	1	0	1	0	0	0.375
424	2019	2019-04-01	12	Secondary	PRE	Girl	1	1	1	1	0	1	0	0	0.625
425	2019	2019-04-01	12	Secondary	PRE	Girl	0	1	1	1	0	1	0	0	0.5
426	2019	2019-04-01	12	Secondary	PRE	Boy	0	1	1	0	1	1	0	1	0.625
427	2019	2019-04-01	12	Secondary	PRE	Boy	0	1	1	0	0	0	0	0	0.25
428	2019	2019-04-01	12	Secondary	PRE	Girl	0	1	0	0	0	1	1	1	0.5
429	2019	2019-04-01	12	Secondary	PRE	Girl	0	1	1	1	0	1	1	1	0.75
430	2019	2019-04-01	12	Secondary	PRE	Girl	1	1	1	1	0	1	0	1	0.75
431	2019	2019-04-01	13	Secondary	PRE	Boy	0	1	1	1	0	0	0	0	0.375
432	2019	2019-04-01	12	Secondary	PRE	Boy	0	1	1	1	1	1	0	1	0.75
433	2019	2019-04-01	12	Secondary	PRE	Boy	1	1	1	1	0	0	0	1	0.625
434	2019	2019-04-01	12	Secondary	PRE	Boy	0	0	0	0	0	0	0	0	0
435	2019	2019-04-01	12	Secondary	PRE	Girl	1	1	1	0	1	0	0	0	0.5
436	2019	2019-04-01	12	Secondary	PRE	Girl	1	1	1	1	0	1	0	1	0.75
437	2019	2019-04-01	12	Secondary	PRE	Girl	0	1	1	1	1	1	0	0	0.625
438	2019	2019-04-01	12	Secondary	PRE	Boy	0	1	0	0	0	1	0	0	0.25
439	2019	2019-04-01	13	Secondary	PRE	Girl	0	1	1	0	0	1	0	0	0.375
440	2019	2019-04-01	13	Secondary	PRE	Girl	1	1	1	1	0	1	1	1	0.875
441	2019	2019-04-01	12	Secondary	PRE	Girl	1	1	0	0	1	0	1	0	0.5
442	2019	2019-04-01	13	Secondary	PRE	Boy	0	1	1	0	0	0	0	0	0.25
443	2019	2019-04-01	12	Secondary	PRE	Girl	1	1	1	0	1	0	1	0	0.625
444	2019	2019-04-01	12	Secondary	PRE	Boy	0	1	0	1	0	1	0	1	0.5
445	2019	2019-04-01	13	Secondary	PRE	Boy	0	1	0	1	0	1	0	0	0.375
446	2019	2019-04-01	12	Secondary	PRE	Girl	1	1	0	1	1	1	1	0	0.75
447	2019	2019-04-01	12	Secondary	PRE	Girl	1	1	0	0	1	0	0	0	0.375
448	2019	2019-04-01	13	Secondary	PRE	Boy	0	1	1	0	1	1	1	0	0.625
449	2019	2019-04-01	13	Secondary	PRE	Boy	0	1	1	0	0	0	0	0	0.25
450	2019	2019-04-01	12	Secondary	PRE	Boy	1	1	1	1	0	1	1	1	0.875
451	2019	2019-04-01	14	Secondary	PRE	Boy	0	1	1	0	0	1	0	0	0.375
452	2019	2019-04-01	13	Secondary	PRE	Girl	0	1	1	0	1	0	0	1	0.5
453	2019	2019-04-25	13	Secondary	PRE	Girl	1	1	1	1	1	1	0	0	0.75
454	2019	2019-04-25	13	Secondary	PRE	Boy	1	1	1	1	0	1	0	0	0.625
455	2019	2019-04-25	12	Secondary	PRE	Boy	1	1	1	1	1	0	0	0	0.625
456	2019	2019-04-25	13	Secondary	PRE	Boy		1	1	1	0	0	1	0	0.5
457	2019	2019-04-25	12	Secondary	PRE	Boy	1	1	1	1	1	0	0	1	0.75
458	2019	2019-04-25	12	Secondary	PRE	Boy	1	1	1	1	1	0	0	1	0.75
459	2019	2019-04-25	13	Secondary	PRE	Boy	1	1	1	1	0	0	1	0	0.625
460	2019	2019-04-25	12	Secondary	PRE	Girl	1	1	1	1	1	0	0	1	0.75
461	2019	2019-04-25	13	Secondary	PRE	Boy	1	1	1	0	1	0	0	1	0.625
462	2019	2019-04-25	12	Secondary	PRE	Girl	1	1	1	1	1	0	0	1	0.75
463	2019	2019-04-25	12	Secondary	PRE		1	1	1	1	0	0	0	0	0.5
464	2019	2019-04-25	12	Secondary	PRE	Boy	0	1	1	0	1	0	0	0	0.375
465	2019	2019-04-25	12	Secondary	PRE	Boy	1	1	1	1	1	0	0	0	0.625
466	2019	2019-04-25	13	Secondary	PRE	Girl	1	1	1	1	0	0	0	0	0.5
467	2019	2019-04-25	13	Secondary	PRE	Boy	1	1	1	1	0	0	0	0	0.5
468	2019	2019-04-25	13	Secondary	PRE		1	1	1	1	0	0	0	0	0.5
469	2019	2019-04-25	13	Secondary	PRE	Boy	1	1	1	1	1	0	1	0	0.75
470	2019	2019-04-25	13	Secondary	PRE	Boy	1	1	1	1	1	1	0	0	0.75
471	2019	2019-04-25	13	Secondary	PRE	Boy	0	1	1	0	0	1	0	0	0.375
472	2019	2019-04-25	13	Secondary	PRE	Boy	1	1	1	1	1	0	0	1	0.75
473	2019	2019-04-25	14	Secondary	PRE	Boy	0	1	1	1	1	1	1	0	0.75
474	2019	2019-04-25	12	Secondary	PRE	Girl	0		1	1	1		1	0	0.5
475	2019	2019-04-25	12	Secondary	PRE	Girl	0	1	1	1	1		0	0	0.5
476	2019	2019-04-25	12	Secondary	PRE	Boy	1	1	1	1	0	0	0	0	0.5
477	2019	2019-04-25	13	Secondary	PRE	Boy	1	1	1	1	0	0	0	0	0.5
478	2019	2019-04-25	13	Secondary	PRE	Girl	0	1	1	1	1	0	0	0	0.5
479	2019	2019-04-26	12	Secondary	PRE	Girl	0	1	0	0	0	1	1	0	0.375
480	2019	2019-04-25	12	Secondary	PRE	Boy	1	1	1	1	1	1	0	0	0.75
481	2019	2019-04-25	13	Secondary	PRE	Girl	1	1	1	1	0	1	0	0	0.625
482	2019	2019-04-25	12	Secondary	PRE	Boy	1	1	1	1	1	1	0	0	0.75
483	2019	2019-04-25	13	Secondary	PRE	Boy	1	1	1	0	0	1	0	0	0.5
484	2019	2019-04-25	12	Secondary	PRE	Boy	1	1	1	1	1	1	0	0	0.75
485	2019	2019-04-25	13	Secondary	PRE	Boy	1	1	1	1	1	0	1	0	0.75
486	2019	2019-04-25	12	Secondary	PRE	Boy	1	1	0	0	1	1	1	0	0.625
487	2019	2019-04-25	12	Secondary	PRE	Boy	0	1	1	1	1	0	0	1	0.625
488	2019	2019-04-25	13	Secondary	PRE	Boy	1	1	1	1	0	1	0	0	0.625
489	2019	2019-04-25	13	Secondary	PRE	Boy	1	1	1	1	1	0	1	0	0.75
490	2019	2019-04-25	13	Secondary	PRE	Boy	1	1	1	1	1	1	1	1	1
491	2019	2019-04-25	12	Secondary	PRE	Girl	1	1	1	1	0	1	1	0	0.75
492	2019	2019-04-25	12	Secondary	PRE	Girl	1	1	1	1	0	1	1	0	0.75
493	2019	2019-04-25	12	Secondary	PRE	Boy	1	1	1	1	1	1	0	1	0.875
494	2019	2019-04-25	17	Secondary	PRE	Girl		1	1						0.25
495	2019	2019-04-25	12	Secondary	PRE	Girl	1	1	1	1	0	0	1	0	0.625
496	2019	2019-04-25	12	Secondary	PRE	Boy	1	1	1	1	1	0	1	0	0.75
497	2019	2019-04-25	12	Secondary	PRE	Boy	1	1	1	1	1	0	1	0	0.75
498	2019	2019-04-25	13	Secondary	PRE	Girl	0	1	1	0	0	0	1	0	0.375
499	2019	2019-04-25	12	Secondary	PRE	Girl	0	1	1	1	1	0	0	0	0.5
500	2019	2019-04-25	12	Secondary	PRE	Boy	0	1	0	0	1	0	0	0	0.25
501	2019	2019-04-25	12	Secondary	PRE	Boy	1	1	1	1	0	0	0	1	0.625
502	2019	2019-04-25	12	Secondary	PRE	Boy			0	0	1	0	1	0	0.25
503	2019	2019-04-25	12	Secondary	PRE	Boy	1	1	1	1	0	1	1	1	0.875
504	2019	2019-04-25	12	Secondary	PRE	Boy	0	1	1	1	0	0	0	1	0.5
505	2019	2019-04-26	12	Secondary	PRE	Boy	0	1	0	0	0	1	0	1	0.375
506	2019	2019-04-26	13	Secondary	PRE	Girl	1	1	1	1	0	1	0	1	0.75
507	2019	2019-04-26	12	Secondary	PRE	Boy	0	1	1	1	1	0	0	1	0.625
508	2019	2019-04-26	13	Secondary	PRE	Boy	1	1	1	0	0	0	1	0	0.5
509	2019	2019-04-26	12	Secondary	PRE	Boy	0	1	0	1	0	1	0	0	0.375
510	2019	2019-04-26	13	Secondary	PRE	Girl	0	1	1	0	0		0	0	0.25
511	2019	2019-04-26	12	Secondary	PRE	Boy	0	1	1	1	0	0	0	1	0.5
512	2019	2019-04-26	13	Secondary	PRE	Boy	0	1	1	0	0	1	1	0	0.5
513	2019	2019-04-26	13	Secondary	PRE	Girl	0	1	1	1	1	0	0	1	0.625
514	2019	2019-04-26	13	Secondary	PRE	Girl	0	1		0	1	0	0		0.25
515	2019	2019-04-26	12	Secondary	PRE	Boy	0	1	1	0	1	0	1	0	0.5
516	2019	2019-04-26	13	Secondary	PRE	Girl	0	1	1	1	1	0	1	1	0.75
517	2019	2019-04-26	13	Secondary	PRE	Boy	0	0	1	1	0	0	1	1	0.5
518	2019	2019-04-26	14	Secondary	PRE	Boy	0	0	1	0		0	0	0	0.125
519	2019	2019-04-26	12	Secondary	PRE	Boy	1	1	1	0	0	0	1	0	0.5
520	2019	2019-04-26	12	Secondary	PRE	Girl	0	1	1	1	1	0	0	0	0.5
521	2019	2019-04-26	12	Secondary	PRE	Boy	0	1	1	1	0	1	0	1	0.625
522	2019	2019-04-26	13	Secondary	PRE	Boy	1	1	1	0	0	0	0	0	0.375
523	2019	2019-04-26	13	Secondary	PRE	Girl	0	1	1	0	1	0	1	1	0.625
524	2019	2019-04-26	13	Secondary	PRE	Girl	1	1	1	1	1	1	1	0	0.875
525	2019	2019-04-26	13	Secondary	PRE	Boy	1	1	1	0	1	1	1	0	0.75
526	2019	2019-04-26	13	Secondary	PRE	Girl	1	1	1	1	0	1	0	1	0.75
527	2019	2019-04-26	12	Secondary	PRE	Boy	0	0	1	1	0	1	1	0	0.5
528	2019	2019-04-26	12	Secondary	PRE	Girl	1	1	1	1	0	1	0	0	0.625
529	2019	2019-04-26	13	Secondary	PRE	Girl	0	1	1	0	0	1	0	1	0.5
530	2019	2019-04-26	13	Secondary	PRE	Girl	0	1	1	0	1	1	0	1	0.625
531	2019	2019-04-26	12	Secondary	PRE	Boy	0	1	1	1	1	0	0	0	0.5
532	2019	2019-04-26	13	Secondary	PRE	Girl	0	1	1	1	1	0	0	1	0.625
533	2019	2019-04-26	12	Secondary	PRE	Boy	0	1	0	0	0	0	0	0	0.125
534	2019	2019-04-26	14	Secondary	PRE	Boy	0	1	0	0	0	1	0	0	0.25
535	2019	2019-04-26	13	Secondary	PRE	Girl	0	1	1	0	1	0	1	0	0.5
536	2019	2019-04-26	13	Secondary	PRE	Boy	1	1	0	1	1	0	0	0	0.5
537	2019	2019-04-26	12	Secondary	PRE	Boy	0	1	0	0	0	0	0	1	0.25
538	2019	2019-04-26	12	Secondary	PRE	Girl	0	1	0	0	0	1	0	1	0.375
539	2019	2019-04-26	12	Secondary	PRE	Girl	1	1	1	0	1	0	1	1	0.75
540	2019	2019-04-26	14	Secondary	PRE	Boy	1	1	0	1	0	0	0	1	0.5
541	2019	2019-04-26	12	Secondary	PRE	Girl	1	1	1	0	1	1	0	0	0.625
542	2019	2019-04-26	12	Secondary	PRE	Girl	0	1	1	0	0	1	0	0	0.375
543	2019	2019-04-26	13	Secondary	PRE	Boy	1	1	1	0	0	0	0	0	0.375
544	2019	2019-04-26	13	Secondary	PRE	Boy	1	1	1	1	0	1	1	0	0.75
545	2019	2019-04-26	12	Secondary	PRE	Boy	1	1	1	1	0	0	1	0	0.625
546	2019	2019-04-26	13	Secondary	PRE	Boy	1	1	1	1	1			0	0.625
547	2019	2019-04-26	12	Secondary	PRE	Boy	1	1	1	1	1	0	0	0	0.625
548	2019	2019-04-26	12	Secondary	PRE	Girl	1	1	1	0	1	1	0	1	0.75
549	2019	2019-04-24	9	Primary	PRE	Boy	0	1	1	0	1	1	0	0	0.5
550	2019	2019-04-24	8	Primary	PRE	Boy	0	1	1	0	1	0	0	0	0.375
551	2019	2019-04-24	9	Primary	PRE	Boy	0	1	1	0	1	0	0	0	0.375
552	2019	2019-04-24	9	Primary	PRE	Girl	0	1	1	0	0	1	1	0	0.5
553	2019	2019-04-24	9	Primary	PRE	Boy	1	0	1	1	1		1	1	0.75
554	2019	2019-04-24	9	Primary	PRE	Girl	0	1	0	1	1	0	0	0	0.375
555	2019	2019-04-24	9	Primary	PRE	Boy	0	1	1	1	0	1	1	0	0.625
556	2019	2019-04-24	8	Primary	PRE	Girl	0	1	0	1	1	0	0	0	0.375
557	2019	2019-04-24	8	Primary	PRE	Girl	0	1	0	1	1	0	0	0	0.375
558	2019	2019-04-24	9	Primary	PRE	Boy	1	0	1	1	1	0	1	1	0.75
559	2019	2019-04-24	9	Primary	PRE	Girl	1	1	1	1	0	0	1	0	0.625
560	2019	2019-04-24	10	Primary	PRE	Boy	0	1	0	0	1		1	0	0.375
561	2019	2019-04-24	9	Primary	PRE	Girl	1	1	0	1	0	1	0	0	0.5
562	2019	2019-04-24	10	Primary	PRE	Boy		1	1	0	0	0	0	0	0.25
563	2019	2019-04-24	10	Primary	PRE	Boy	0	1	1	0	1	0	1	0	0.5
564	2019	2019-04-24	9	Primary	PRE	Boy	0	1	1	0	1	1	0	0	0.5
565	2019	2019-04-24	9	Primary	PRE	Girl	1	1	1	0	0	1	0	0	0.5
566	2019	2019-04-24	9	Primary	PRE	Boy	0	1	0	0	1	0	0	0	0.25
567	2019	2019-04-24	8	Primary	PRE	Girl	0	1	0	1	1	1	0	0	0.5
568	2019	2019-04-24	8	Primary	PRE	Boy	0	1	1	1	1	0	1	0	0.625
569	2019	2019-04-24	10	Primary	PRE	Boy	1	1	0	0	0	0	0	0	0.25
570	2019	2019-04-24	9	Primary	PRE	Girl	0	1	0	0	0	0	1	0	0.25
571	2019	2019-04-24	9	Primary	PRE	Boy	1	1	1	1	0	0	1	0	0.625
572	2019	2019-04-24	8	Primary	PRE	Girl	0	0	1	0	0	0	0	0	0.125
573	2019	2019-04-24	10	Primary	PRE	Girl	1	1	1	1	0	0	1	0	0.625
574	2019	2019-04-24	9	Primary	PRE	Girl	1	1	1	1	0	0	1	0	0.625
575	2019	2019-04-24	9	Primary	PRE	Boy	1		1	1	1	0	1	0	0.625
576	2019	2019-04-24	9	Primary	PRE	Girl	0	1	0	0		0		0	0.125
577	2019	2019-04-24	8	Primary	PRE	Girl	1	1	1						0.375
578	2019	2019-04-24	10	Primary	PRE	Girl	1								0.125
579	2019	2019-04-24	8	Primary	PRE	Boy	0	1	0	1	0	0		0	0.25
580	2019	2019-04-24	8	Primary	PRE	Girl	0	1	1	0	0	0	0	0	0.25
581	2019	2019-04-24	9	Primary	PRE	Girl	0	1	1	0	0	0	1	0	0.375
582	2019	2019-04-24	9	Primary	PRE	Girl	0	1	1	0	1	0	0	0	0.375
583	2019	2019-04-24	9	Primary	PRE	Girl	1	1	1	0	0	0	1	0	0.5
584	2019	2019-04-24	9	Primary	PRE	Girl	1	1	1	0	0	1	0	0	0.5
585	2019	2019-04-24	10	Primary	PRE	Boy	0	1	1	0	1	0	0	0	0.375
586	2019	2019-04-24	10	Primary	PRE	Boy	0	1	1	0	1	0	0	0	0.375
587	2019	2019-04-24	9	Primary	PRE	Boy	1	1	1	0	1	0	0	0	0.5
588	2019	2019-04-24	9	Primary	PRE	Girl	1	1	1	0	0	1	0	0	0.5
589	2019	2019-04-24	8	Primary	PRE	Boy	0	1	1	1	0	1	0	0	0.5
590	2019	2019-04-24	9	Primary	PRE	Boy	0	1	1	0	0	0	1	1	0.5
591	2019	2019-04-24	8	Primary	PRE	Boy	1	1	1	0	1	0	0	0	0.5
592	2019	2019-04-24	9	Primary	PRE	Boy	0	1	1	0	1	1	0	0	0.5
593	2019	2019-04-24	8	Primary	PRE	Girl	1	1	1	0	1	0	1	0	0.625
594	2019	2019-04-24	9	Primary	PRE	Girl	0	1	0	1	1	0	0	0	0.375
595	2019	2019-04-24	10	Primary	PRE	Boy	0	0	0	1	0	0	0	1	0.25
596	2019	2019-04-24	11	Primary	PRE	Boy	0	1	1	1	0	1	0	0	0.5
597	2019	2019-04-24	9	Primary	PRE	Girl	0	1	1	1	0	0	0	0	0.375
598	2019	2019-04-24	9	Primary	PRE	Girl	0	1	1	1	0	0	1	0	0.5
599	2019	2019-04-24	8	Primary	PRE	Boy	0	0	0	1	0	0	1	0	0.25
600	2019	2019-04-24	9	Primary	PRE	Girl	1	1	1	0	0	1	0	0	0.5
601	2019	2019-05-07	14	Secondary	PRE		0	1	1	1	1	0	1	0	0.625
602	2019	2019-05-07	14	Secondary	PRE	Boy	0	1	1	0	0	1	0	0	0.375
603	2019	2019-05-07	14	Secondary	PRE	Girl	0	1	1	0	1	0	0	1	0.5
604	2019	2019-05-07	14	Secondary	PRE	Boy	0	1	0	0	0	1	1	0	0.375
605	2019	2019-05-07	14	Secondary	PRE	Girl	0	1	1	1	0	0	0	1	0.5
606	2019	2019-05-07	15	Secondary	PRE	Girl	1	1	1	1	0	0	0	1	0.625
607	2019	2019-05-07	14	Secondary	PRE	Girl	1	1	1	1	0	0	0	0	0.5
608	2019	2019-05-07	14	Secondary	PRE	Girl	1	1	1	1	0	0	0	0	0.5
609	2019	2019-05-07	15	Secondary	PRE	Boy	0	1	1	1	1	0	1	0	0.625
610	2019	2019-05-07	14	Secondary	PRE	Boy	1	1	1	1	0	0	0	0	0.5
611	2019	2019-05-07	15	Secondary	PRE	Girl	1	1	1	1	0	0	0	1	0.625
612	2019	2019-05-07	14	Secondary	PRE	Boy	1	1	1	1	0	1	0	1	0.75
613	2019	2019-05-07	15	Secondary	PRE	Boy	1	1	1	1	1	1	0	1	0.875
614	2019	2019-05-07	14	Secondary	PRE	Boy	0	1	0	1	0	1	0	0	0.375
615	2019	2019-05-07	14	Secondary	PRE	Boy	1	1	1	1	1	0	0	1	0.75
616	2019	2019-05-07	15	Secondary	PRE	Girl	0	1	1	1	0	1	0	0	0.5
617	2019	2019-05-07	14	Secondary	PRE	Girl	0	1	0	1	0	0	0	1	0.375
618	2019	2019-05-07	15	Secondary	PRE	Girl	0	1	1	0	0	1	0	0	0.375
619	2019	2019-05-07	14	Secondary	PRE	Girl	1	1	1	1	1	0	0	1	0.75
620	2019	2019-05-08	13	Secondary	PRE	Boy	0	1	1	1	0	1	1	1	0.75
621	2019	2019-05-08	12	Secondary	PRE	Girl	1	1	1	1	0	0	0	0	0.5
622	2019	2019-05-08	13	Secondary	PRE	Boy	0	1	0	0	1	0	0	0	0.25
623	2019	2019-05-08	12	Secondary	PRE	Boy	0	1	0	0	0	0	0	0	0.125
624	2019	2019-05-08	13	Secondary	PRE	Boy	0	1	0	1	0	0	0	0	0.25
625	2019	2019-05-08	12	Secondary	PRE	Girl	0	1	0	0	0	0	0	0	0.125
626	2019	2019-05-08	12	Secondary	PRE	Girl	0	1	1	0	0	1	1	0	0.5
627	2019	2019-05-08	13	Secondary	PRE	Girl	0	1	1	1	1	1	1	0	0.75
628	2019	2019-05-08	13	Secondary	PRE	Girl	1	1	1	1	1	0	0	0	0.625
629	2019	2019-05-08	12	Secondary	PRE	Boy	1	1	1	0	0	1	1	1	0.75
630	2019	2019-05-08	12	Secondary	PRE	Girl	1	0	1	0	0	1	0	0	0.375
631	2019	2019-05-08	13	Secondary	PRE	Boy	1	1	1	0	1	0	1	1	0.75
632	2019	2019-05-08	12	Secondary	PRE	Boy	0	1	1	1	1	0	1	0	0.625
633	2019	2019-05-08	14	Secondary	PRE	Boy	1	1	1	0	0	0	0	1	0.5
634	2019	2019-05-08	13	Secondary	PRE	Boy	1	1		1	0	0	0	0	0.375
635	2019	2019-05-08	12	Secondary	PRE	Girl	1	1	1	0	1	0	0	0	0.5
636	2019	2019-05-08	12	Secondary	PRE	Boy	0	0	1	0	0	0	0	0	0.125
637	2019	2019-05-08	12	Secondary	PRE	Girl	0	1	1	1	0	1	1	0	0.625
638	2019	2019-05-08	12	Secondary	PRE	Girl	1	1	1	1	0	1	0	0	0.625
639	2019	2019-05-08	13	Secondary	PRE	Boy	0	1	0	0	0	0	0	0	0.125
640	2019	2019-05-08	12	Secondary	PRE	Girl	1	1	0	1	0	0	0	0	0.375
641	2019	2019-05-08	13	Secondary	PRE	Girl	0	1	0	0	0	0	0	0	0.125
642	2019	2019-05-08	13	Secondary	PRE	Boy	0	1	1	1	0	1	0	0	0.5
643	2019	2019-05-08	13	Secondary	PRE	Girl	1	1	1	1	1	0	1	0	0.75
644	2019	2019-05-08	12	Secondary	PRE	Boy	0	1	0	0	0	0		0	0.125
645	2019	2019-05-15	12	Secondary	PRE	Girl	0	1	1	1	1	0	0	0	0.5
646	2019	2019-05-15	13	Secondary	PRE	Boy	0	1	1	0	0	1	1	0	0.5
647	2019	2019-05-15	13	Secondary	PRE	Boy	1	1	1	0	0	0	0	0	0.375
648	2019	2019-05-15	13	Secondary	PRE	Girl	0	1	1	1	1	0	0	0	0.5
649	2019	2019-05-15	13	Secondary	PRE	Girl	1	1	1	1	1	0	0	0	0.625
650	2019	2019-05-15	13	Secondary	PRE	Girl	1	1	1	1	1	1	0	0	0.75
651	2019	2019-05-15	12	Secondary	PRE	Girl	0	1	1	1	0	0	0	0	0.375
652	2019	2006-04-15	13	Secondary	PRE	Girl	0	1	1	1	0	0	0	0	0.375
653	2019	2019-05-15	13	Secondary	PRE	Boy	1	1	1	0	1	1	0	0	0.625
654	2019	2019-05-15	12	Secondary	PRE	Girl	0	1	1	1	0	0	0	1	0.5
655	2019	2019-05-15	12	Secondary	PRE	Girl	0		1	0		1	0	0	0.25
656	2019	2019-05-15	12	Secondary	PRE	Girl	0	1	1	1	0	1	0	0	0.5
657	2019	2019-05-15	13	Secondary	PRE	Girl	1	1	1	1	1	0	0	1	0.75
658	2019	2019-05-15	12	Secondary	PRE	Boy	0	1	0	1	1	0	0	0	0.375
659	2019	2019-05-15	12	Secondary	PRE	Boy	0	1	1	1	1	0	0	0	0.5
660	2019	2019-05-15	13	Secondary	PRE	Boy	1	1	1	0	1	0	1	1	0.75
661	2019	2019-05-15	13	Secondary	PRE	Girl	0	1	1	1	0	0	0	1	0.5
662	2019	2019-05-15	12	Secondary	PRE	Girl	0	1	0	1	1	1	1	1	0.75
663	2019	2019-05-15	12	Secondary	PRE	Boy	0	1	1	0	1	0	0	1	0.5
664	2019	2019-05-15	13	Secondary	PRE	Girl	1	1	1	1	1	0	0	0	0.625
665	2019	2019-05-15	12	Secondary	PRE	Boy	1	1	1	1	1	1	0	0	0.75
666	2019	2019-05-13	13	Secondary	PRE	Girl	1	1	1	1	0	0	0	0	0.5
667	2019	2019-05-13	13	Secondary	PRE	Girl	0	1	1	0	0	0	0	1	0.375
668	2019	2019-05-13	13	Secondary	PRE	Boy	0	1	1	0	1	1	0	0	0.5
669	2019	2019-05-13	12	Secondary	PRE	Boy	0	1	1	1	1	0	1	0	0.625
670	2019	2019-05-13	12	Secondary	PRE	Boy	0	1	1						0.25
671	2019	2019-05-13	12	Secondary	PRE	Boy	0	1	1	0	1	0	0	0	0.375
672	2019	2019-05-13	13	Secondary	PRE	Boy	1	1	1	0			0	1	0.5
673	2019	2019-05-13	12	Secondary	PRE	Boy	1	1	1	1	1		0	1	0.75
674	2019	2019-05-13	12	Secondary	PRE	Girl	1	1	1	1	1	0	1	0	0.75
675	2019	2019-05-13	11	Secondary	PRE	Boy	1	1	1		0	1	1	1	0.75
676	2019	2019-05-13	13	Secondary	PRE	Girl	1	1	1	1	0	1	1	1	0.875
677	2019	2019-05-13	12	Secondary	PRE	Girl	1	1	1	1	0		1	0	0.625
678	2019	2019-05-13	12	Secondary	PRE	Boy	0	1	0		0		0	0	0.125
679	2019	2019-05-13	13	Secondary	PRE	Girl	1	1	1	1	0	1	1	0	0.75
680	2019	2019-05-13	12	Secondary	PRE	Boy	1	1	1	0	1	0	0	1	0.625
681	2019	2019-05-13	12	Secondary	PRE	Boy	0	1	1	1	1	0	0	1	0.625
682	2019	2019-05-30	11	Primary	PRE	Boy	0	1	1	0	0	1	0	1	0.5
683	2019	2019-05-30	10	Primary	PRE	Boy	1	1	1	1	0	1	0	0	0.625
684	2019	2019-05-30	11	Primary	PRE	Girl	0	1	1	1	0	1	0	0	0.5
685	2019	2019-05-30	11	Primary	PRE	Girl	1	1	1	1	0	0	0	0	0.5
686	2019	2019-05-30	10	Primary	PRE	Boy	0	1	1	1	0	0	1	1	0.625
687	2019	2019-05-30	11	Primary	PRE	Girl	1	0	1	1	0	1	0	1	0.625
688	2019	2019-05-30	10	Primary	PRE	Boy	1	1	1	1	0	0	0	1	0.625
689	2019	2019-05-30	11	Primary	PRE	Girl	0	1	1	1	0	0	1	1	0.625
690	2019	2019-05-30	10	Primary	PRE	Boy	0	1	0	0	0	1	0	0	0.25
691	2019	2019-05-30	10	Primary	PRE	Boy	1	1	1	1	0	0	0	0	0.5
692	2019	2019-05-30	10	Primary	PRE	Boy	1	1	1	1	0	0	0	0	0.5
693	2019	2019-05-30	10	Primary	PRE	Boy	0	0	1	1	1	1	0	1	0.625
694	2019	2019-05-30	10	Primary	PRE	Girl	0	1	1	1	0	0	1	1	0.625
695	2019	2019-05-30	11	Primary	PRE	Boy	0	1	0	1	0	0	1	1	0.5
696	2019	2019-06-07	11	Primary	PRE										0
697	2019	2019-06-07	11	Primary	PRE										0
698	2019	2019-06-07	11	Primary	PRE	Boy	1	1	0	1	0	0	1	0	0.5
699	2019	2019-06-07	10	Primary	PRE	Girl	0	1	1	0	0	0	1	0	0.375
700	2019	2019-06-07	11	Primary	PRE	Boy	0	0	1	0	0	0	0	0	0.125
701	2019	2019-06-07	10	Primary	PRE	Boy	1	1	1	1	1	0	0	0	0.625
702	2019	2019-06-07	11	Primary	PRE	Boy	1	1	1	1	1	0	1	1	0.875
703	2019	2019-06-07	10	Primary	PRE	Boy	1	1	0	0	1	0	0	0	0.375
704	2019	2019-06-07	11	Primary	PRE	Boy	0	1	1	1	1	1	0	0	0.625
705	2019	2019-06-07	10	Primary	PRE	Boy	1	1	0	0	1	0	1	0	0.5
706	2019	2019-06-07	10	Primary	PRE	Girl	0	1	0	0	1	0	0	0	0.25
707	2019	2019-06-07	10	Primary	PRE	Girl	0	1	0	0	1	0	0	0	0.25
708	2019	2019-06-07	10	Primary	PRE	Girl	0	1	1	1	0	0	1	0	0.5
709	2019	2019-06-07	11	Primary	PRE	Girl	0	1	1	0	0	0	1	0	0.375
710	2019	2019-06-07	10	Primary	PRE	Girl	0	1	0	1	1	1	0	1	0.625
711	2019	2019-06-07	10	Primary	PRE	Girl	0	1	0	0	0	0	0	0	0.125
712	2019	2019-06-07	11	Primary	PRE	Girl	0	1	1	0	0	1	0	0	0.375
713	2019	2019-06-07	11	Primary	PRE	Girl	0	1	1	0	1	0	0	0	0.375
714	2019	2019-06-07	11	Primary	PRE	Boy	1	0	0	0	0	1	1	0	0.375
715	2019	2019-06-07	10	Primary	PRE	Girl	0	0	0	0	1	0	0	0	0.125
716	2019	2019-06-07	11	Primary	PRE	Boy	1	1	1	0	1	0	1	0	0.625
717	2019	2019-06-07	11	Primary	PRE	Girl	0	1	1	0	0	0	0	0	0.25
718	2019	2019-06-07	11	Primary	PRE	Girl	0	1	1	0	0	0	0	0	0.25
719	2019	2019-06-07	11	Primary	PRE	Boy	0	1	1	1	1	0	0	0	0.5
720	2019	2019-06-07	11	Primary	PRE	Boy	1	1	1	1	0	0	1	0	0.625
721	2019	2019-06-07	11	Primary	PRE	Boy	1	1	1	1	1	0	0	0	0.625
722	2019	2019-06-13	9	Secondary	PRE	Girl	1	1	1	1	1	1	0	1	0.875
723	2019	2019-06-13	14	Secondary	PRE	Girl	1	1	1	1	0	1	0	0	0.625
724	2019	2019-06-13	15	Secondary	PRE	Boy	1	1	1	1	1	0	1	1	0.875
725	2019	2019-06-13	14	Secondary	PRE	Boy	1	1	1	1	0	0	1	0	0.625
726	2019	2019-06-13	15	Secondary	PRE	Boy	0	1	0	1	0	0	0	1	0.375
727	2019	2019-06-13	15	Secondary	PRE		1	1	1	1	0	0	0	1	0.625
728	2019	2019-06-13	15	Secondary	PRE	Girl	1	1	1	0	0	1	0	0	0.5
729	2019	2019-06-13	15	Secondary	PRE	Girl	1	1	1	0	0	0	1	0	0.5
730	2019	2019-06-13	16	Secondary	PRE	Boy	1	0	1	1	0	0	1	0	0.5
731	2019	2019-06-13	14	Secondary	PRE	Boy	1	1	1	1	0	1	1	0	0.75
732	2019	2019-06-13	15	Secondary	PRE	Boy	0	1	1	0	1	0	0	1	0.5
733	2019	2019-06-13	14	Secondary	PRE	Girl	1	1	1	1	0	0	1	0	0.625
734	2019	2019-06-13	15	Secondary	PRE	Boy	1	1	0	1	0	0	0	1	0.5
735	2019	2019-06-13	15	Secondary	PRE	Girl	1	0	1	0	0	0	1	0	0.375
736	2019	2019-06-13	14	Secondary	PRE	Girl	1	1	1	1	0	0	0	0	0.5
737	2019	2019-06-13	14	Secondary	PRE	Girl		1	1	1			0	0	0.375
738	2019	2019-06-13	14	Secondary	PRE	Girl	0	1	1	0	0	0	1	0	0.375
739	2019	2019-06-13	14	Secondary	PRE	Girl	0	1	1	1	0	0	0	0	0.375
740	2019	2019-06-13	14	Secondary	PRE	Girl	1	1	1	0	1	0		1	0.625
741	2019	2019-06-13	14	Secondary	PRE	Boy	1	0	1	0	1	1	1	0	0.625
742	2019	2019-06-13	15	Secondary	PRE	Girl	1	1	1	1			0		0.5
743	2019	2019-06-13	15	Secondary	PRE	Girl	1	1	1	0	0	0	0		0.375
744	2019	2019-06-13	15	Secondary	PRE	Boy	1	1	1	1	0	1	0	1	0.75
745	2019	2019-06-13	15	Secondary	PRE	Boy	1	1	1	0	0	0	1	0	0.5
746	2019	2019-06-13	15	Secondary	PRE	Boy	1	1	1	1	0	0	0	0	0.5
747	2019	2019-06-13	14	Secondary	PRE	Boy	0	1	1	0	0	0	1	0	0.375
748	2019	2019-06-13	15	Secondary	PRE	Boy	0	0	1	1	0	0	0	0	0.25
749	2019	2019-06-13	15	Secondary	PRE	Girl	1	1	1	1	1	0	0	1	0.75
750	2019	2019-06-13	15	Secondary	PRE	Girl	0	1		1	1	1	0	1	0.625
751	2019	2019-06-13	15	Secondary	PRE	Girl	1	1	1	0	1	0	1	1	0.75
752	2019	2019-06-13	14	Secondary	PRE	Girl	1	1	1	1	1	1	0	1	0.875
753	2018	2018-03-15	12	Secondary	PRE	Boy	0	1	1	0	0	0	0	1	0.375
754	2018	2018-03-15	13	Secondary	PRE	Girl	1	0	1	1	0	1	0	1	0.625
755	2018	2018-03-15	12	Secondary	PRE	Girl	0	1	0	0	0	1	0	0	0.25
756	2018	2018-03-15	12	Secondary	PRE	Girl	0	1	1	0	1	1	0	0	0.5
757	2018	2018-03-15	15	Secondary	PRE	Boy	1	1	1	1	1	0	0	1	0.75
758	2018	2018-03-15	13	Secondary	PRE	Boy	0	1	1	1	0	0	1	1	0.625
759	2018	2018-03-15	12	Secondary	PRE	Girl	1	1	1	0	1	0	0	0	0.5
760	2018	2018-03-15	13	Secondary	PRE	Girl	0	1	1	1	0	0	0	0	0.375
761	2018	2018-03-15	12	Secondary	PRE	Boy	0	1	0	0	0	0	1	0	0.25
762	2018	2018-03-15	12	Secondary	PRE	Boy	1	0	1	0		0	1	0	0.375
763	2018	2018-03-15	12	Secondary	PRE	Girl	0	1	1	1	0	1	1	0	0.625
764	2018	2018-03-15	12	Secondary	PRE	Girl	1	0	1	0	1	1	0	1	0.625
765	2018	2018-03-15	12	Secondary	PRE	Boy	0	1	1	0	1	0	1	0	0.5
766	2018	2018-03-15	12	Secondary	PRE	Boy	1	0	1	0	0	0	1	0	0.375
767	2018	2018-03-15	12	Secondary	POST	Girl	0	1	1	1	1	0	0	1	0.625
768	2018	2018-03-15	12	Secondary	POST	Girl	0	1	1	1	0	0	0	0	0.375
769	2018	2018-03-15	12	Secondary	POST	Girl	1	1	1	0	0	0	0	1	0.5
770	2018	2018-03-15	13	Secondary	POST	Girl	1	1	1	0	0	0	0	1	0.5
771	2018	2018-03-15	12	Secondary	POST	Girl	1	1	1	1	1	0	1	0	0.75
772	2018	2018-03-15	12	Secondary	POST	Girl	1	1	1	1	1	0	0	1	0.75
773	2018	2018-03-15	12	Secondary	POST	Boy	1	1	1	1	0	0	0	1	0.625
774	2018	2018-03-15	13	Secondary	POST	Boy	0	1	1	1	1	1	0	0	0.625
775	2018	2018-03-15	12	Secondary	POST	Boy	1	1	1	1	0	0	0	0	0.5
776	2018	2018-03-15	12	Secondary	POST	Boy	1	0	1	0	1	0	0	0	0.375
777	2018	2018-03-15	12	Secondary	POST	Boy	1	1	1	1	1	1	0	0	0.75
778	2018	2018-03-15	12	Secondary	POST	Boy	1	1	1	1	1	0	1	1	0.875
779	2018	2018-03-15	13	Secondary	POST	Girl	0	1	1	1	1	0	0	0	0.5
780	2018	2018-03-15	13	Secondary	POST	Girl	1	1	1	0	1	1	0	1	0.75
781	2018	2018-03-15	12	Secondary	POST	Girl	1	1	1	1	1	0	0	1	0.75
782	2018	2018-03-15	13	Secondary	POST	Boy	0	1	1	1	1	1	0	0	0.625
783	2018	2018-03-15	12	Secondary	POST	Girl	0	1	1	1	0	0	0	1	0.5
784	2018	2018-03-15	13	Secondary	POST	Boy	0	1	1	1	1	1	0	0	0.625
785	2018	2018-03-22	9	Primary	PRE	Boy	1	1	1	1	1	0	0	0	0.625
786	2018	2018-03-22	10	Primary	PRE	Boy	0	1	1	0	0	1	0	1	0.5
787	2018	2018-03-22	9	Primary	PRE	Boy	1	1	1	1	1	1	0	0	0.75
788	2018	2018-03-22	9	Primary	PRE	Girl	0	1	1	0	0	0	0	0	0.25
789	2018	2018-03-22	10	Primary	PRE	Girl	0	1	1	0	0	0	0	0	0.25
790	2018	2018-03-22	9	Primary	PRE	Girl	1	1	1	0	0	1	0	0	0.5
791	2018	2018-03-22	9	Primary	PRE	Boy	0	1	0	0	0	0	0	0	0.125
792	2018	2018-03-22	9	Primary	PRE	Boy	0	1	1	1	1	0	1	0	0.625
793	2018	2018-03-22	10	Primary	PRE	Girl	0	1	0	1	1	1	0	0	0.5
794	2018	2018-03-22	9	Primary	PRE	Girl	0	1	0	0	0	1	0	0	0.25
795	2018	2018-03-22	9	Primary	PRE	Girl	0	1	0	1	0	1	0	0	0.375
796	2018	2018-03-22	10	Primary	PRE	Girl	0	1	0	0	1	0	0	0	0.25
797	2018	2018-03-22	9	Primary	PRE	Girl	1	0	0	1	0	0	0	0	0.25
798	2018	2018-03-22	9	Primary	PRE	Boy	0	1	0	0	0	0	0	0	0.125
799	2018	2018-03-22	9	Primary	PRE	Boy	0	1	1	0	1	1	0	0	0.5
800	2018	2018-03-22	9	Primary	PRE	Girl	0	0	1	0	0	0	0	0	0.125
801	2018	2018-03-22	9	Primary	PRE	Boy	0	0	1	0	1	0	0	0	0.25
802	2018	2018-03-22	9	Primary	PRE	Boy	0	1	0	1	1	0	0	0	0.375
803	2018	2018-03-22	9	Primary	PRE	Girl	1	0	1	1	1	1	0	0	0.625
804	2018	2018-03-22	9	Primary	PRE	Girl	1	0	1	0	1	1	0	0	0.5
805	2018	2018-03-22	9	Primary	PRE	Girl	0	1	1	0	1	0	0	0	0.375
806	2018	2018-03-22	9	Primary	PRE	Boy	1	1	1	1	1	1	1	0	0.875
807	2018	2018-03-22	10	Primary	PRE	Girl	0	1	1	1	0	0	0	0	0.375
808	2018	2018-03-22	10	Primary	PRE	Girl	0	1	1	1	0	0	0	0	0.375
809	2018	2018-03-22	10	Primary	PRE	Girl	0	1	1	0	0	0	0	0	0.25
810	2018	2018-03-22	10	Primary	PRE	Girl	0	1	1	0	0	1	0	0	0.375
811	2018	2018-03-22	9	Primary	PRE	Girl	0	1	1	0	0	0	0	1	0.375
812	2018	2018-03-22	10	Primary	PRE	Boy	1	1	1	0	1	1	1	0	0.75
813	2019	2019-03-22	8	Primary	PRE	Boy	1	0	1	0	0	0	0	0	0.25
814	2019	2019-03-22	8	Primary	PRE	Boy	0	1	0	0	0	0	0	1	0.25
815	2019	2019-03-22	8	Primary	PRE	Girl	0	1	0	1	1	0	0	0	0.375
816	2019	2019-03-22	8	Primary	PRE		0	1		0	1	0	1	0	0.375
817	2019	2019-03-22	9	Primary	PRE	Boy	0	1	1	0	1	0	1	0	0.5
818	2019	2019-03-22	8	Primary	PRE	Boy	0	1	0	0	0	0	0	1	0.25
819	2019	2019-03-22	9	Primary	PRE	Boy	1	1	1	0	1	0	0	0	0.5
820	2019	2019-03-22	8	Primary	PRE	Boy	0	1	0	0	0	0	0	0	0.125
821	2019	2019-03-22	9	Primary	PRE	Boy	0	1	1	1	1	0	1	0	0.625
822	2018	2018-04-20	12	Secondary	PRE	Boy	1	1	1	1	0	1	1	0	0.75
823	2018	2018-04-20	13	Secondary	PRE	Boy	1	1	1	1	0	1	1	0	0.75
824	2018	2018-04-20	13	Secondary	PRE	Boy	0	1	0	1	0	1	0	0	0.375
825	2018	2018-04-20	12	Secondary	PRE	Girl	0	1	1	1	0	0	1	1	0.625
826	2018	2018-04-20	12	Secondary	PRE	Girl	0	1	1	0	0	1	0	0	0.375
827	2018	2018-04-20	13	Secondary	PRE	Boy	1	1	1	0	0	1	1	0	0.625
828	2018	2018-04-20	12	Secondary	PRE	Girl	0	1	0	0	1	0	0	0	0.25
829	2018	2018-04-20	12	Secondary	PRE	Girl	0	1	0	0	0	1	1	0	0.375
830	2018	2018-04-20	12	Secondary	PRE	Boy	1	1	1	0	1	0	0	0	0.5
831	2018	2018-04-20	12	Secondary	PRE	Boy	1	1	1	1	1	0	0	0	0.625
832	2018	2018-04-20	12	Secondary	PRE	Boy	0	1	1	0	0	1	0	0	0.375
833	2018	2018-04-20	13	Secondary	PRE	Boy	0	1	1	1	0	0	0	1	0.5
834	2018	2018-04-20	13	Secondary	PRE	Girl	1	1	1	1	1	1	1	0	0.875
835	2018	2018-04-20	13	Secondary	PRE	Girl	0	1	1	1	0	0	1	1	0.625
836	2018	2018-04-20	12	Secondary	PRE	Girl	0	1	1	1	1	0	1	0	0.625
837	2018	2018-04-20	12	Secondary	PRE	Boy	0	1	1	0	0	0	1	0	0.375
838	2018	2018-04-20	12	Secondary	POST	Girl	0	1	1	0	1	1	0	1	0.625
839	2018	2018-04-20	12	Secondary	POST	Girl	1	1	1	1	1	1	0	1	0.875
840	2018	2018-04-20	13	Secondary	POST	Girl	1	1	1	1	1	0	0	1	0.75
841	2018	2018-04-20	12	Secondary	POST	Girl	1	1	1	1	1	1	0	1	0.875
842	2018	2018-04-20	13	Secondary	POST	Boy	1	1	0	0	1	1	0	1	0.625
843	2018	2018-04-20	12	Secondary	POST	Girl	1	1	1	1	1	1	0	0	0.75
844	2018	2018-04-20	12	Secondary	POST	Girl	1	1	1	1	1	1	0	0	0.75
845	2018	2018-04-20	12	Secondary	POST	Girl	1	1	1	1	1	1	0	0	0.75
846	2018	2018-04-20	12	Secondary	POST	Girl	1	1	1	1	1	1	0	1	0.875
847	2018	2018-04-20	13	Secondary	POST	Girl	1	1	1	1	1	1	0	1	0.875
848	2018	2018-04-20	13	Secondary	POST	Boy	1	0	1	0	0	1	0	0	0.375
849	2018	2018-04-20	13	Secondary	POST	Boy	0	1	1	1	1	1	0	1	0.75
850	2018	2018-04-20	12	Secondary	POST	Boy	1	1	1	1	1	1	0	1	0.875
851	2018	2018-04-20	12	Secondary	POST	Boy	1	1	1	1	1	1	0	1	0.875
852	2018	2018-04-20	13	Secondary	POST	Boy	1	1	1	1	0	1	0	1	0.75
853	2018	2018-04-20	12	Secondary	POST	Boy	1	1	1	0	1	1	0	1	0.75
854	2018	2018-04-26	17	Baccalaureate	POST	Girl	1	1	1	1	0	1	0	0	0.625
855	2018	2018-04-26	16	Baccalaureate	POST	Girl	0	1	1	0	1	1	0	1	0.625
856	2018	2018-04-26	16	Baccalaureate	POST	Boy	1	1	1	1	0	1	0	1	0.75
857	2018	2018-04-26	16	Baccalaureate	POST	Girl	1	1	1	1	1	1	1	0	0.875
858	2018	2018-04-26	17	Baccalaureate	POST	Girl	1	1	1	1	0	1	0	1	0.75
859	2018	2018-04-26	16	Baccalaureate	POST	Girl	1	1	1	1	0	1	0	0	0.625
860	2018	2018-04-26	17	Baccalaureate	POST	Girl	1	1	1	1	0	0	0	1	0.625
861	2018	2018-04-26	16	Baccalaureate	POST	Girl	1	1	1	1	1	0	0	1	0.75
862	2018	2018-04-26	16	Baccalaureate	POST	Girl	1	1	1	1	0	1	0	1	0.75
863	2018	2018-04-26	17	Baccalaureate	POST	Girl	1	1	1	1	0	1	0	1	0.75
864	2018	2018-04-26	16	Baccalaureate	POST	Girl	1	1	1	1	0	0	0	1	0.625
865	2018	2018-04-26	17	Baccalaureate	POST	Boy	0	1	1	1	1	1	0	0	0.625
866	2018	2018-04-26	16	Baccalaureate	POST	Girl	1	1	1	1	0	1	1	0	0.75
867	2018	2018-04-26	17	Baccalaureate	POST	Boy	1	1	1	1	1	1	0	1	0.875
868	2018	2018-04-26	16	Baccalaureate	POST	Girl	0	1	0	0	0	1	1	1	0.5
869	2018	2018-04-26	16	Baccalaureate	POST	Girl	1	1	1	1	0	1	0	1	0.75
870	2018	2018-04-26	16	Baccalaureate	POST	Girl	0	1	1	0	1	1	0	1	0.625
871	2018	2018-04-26	17	Baccalaureate	POST	Girl	1	1	1	1	1	1	0	1	0.875
872	2018	2018-04-26	16	Baccalaureate	POST	Boy	1	1	1	1	1	1	1	1	1
873	2018	2018-05-17	9	Primary	PRE	Girl	1	1	1	1	1	1	0	0	0.75
874	2018	2018-05-17	9	Primary	PRE	Girl	1	1	1	1	1	1	0	0	0.75
875	2018	2018-05-17	8	Primary	POST	Boy	1	1	1	1	1	1	0	1	0.875
876	2018	2018-05-17	9	Primary	POST	Boy	1	1	0	1	1	1	0	1	0.75
877	2018	2018-05-17	9	Primary	POST	Girl	1	1	1	1	1	1	0	1	0.875
878	2018	2018-05-17	9	Primary	POST	Girl	1	1	1	1	1	0	1	0	0.75
879	2018	2018-05-17	9	Primary	POST	Boy	1	1	1	1	1	1	0	1	0.875
880	2018	2018-05-17	8	Primary	POST	Girl	1	1	1	1	1	0	0	0	0.625
881	2018	2018-05-17	8	Primary	POST	Boy	1	1	0	0	1	1	0	0	0.5
882	2018	2018-05-17	9	Primary	POST	Girl	1	1	1	0	1	0	0	0	0.5
883	2018	2018-05-17	9	Primary	POST	Boy	0	1	1	1	1	1	0	1	0.75
884	2018	2018-05-17	9	Primary	POST	Girl	1	1	1	1	1	1	0	0	0.75
885	2018	2018-05-17	8	Primary	POST	Girl	1	1	0	1	1	1	0	1	0.75
886	2018	2018-05-17	8	Primary	POST	Girl	1	1	1	0	1	1	0	1	0.75
887	2018	2018-05-17	9	Primary	POST	Girl	1	1	1	0	1	1	1	0	0.75
888	2018	2018-05-17	8	Primary	POST	Girl	1	1	1	0	1	1	1	0	0.75
889	2018	2018-05-17	9	Primary	POST	Girl	1	1	1	1	1	0	0	1	0.75
890	2018	2018-05-17	9	Primary	POST	Boy	1	1	1	0	1	1	0	0	0.625
891	2018	2018-05-17	8	Primary	POST	Girl	1	1	1	1	1	1	0	0	0.75
892	2018	2018-05-17	9	Primary	POST	Boy	1	1	0	1	0	1	1	0	0.625
893	2018	2018-05-17	9	Primary	POST	Girl	1	1	1	0	1	0	1	0	0.625
894	2018	2018-05-17	8	Primary	POST	Boy	1	1	1	1	1	1	0	1	0.875
895	2018	2018-05-17	8	Primary	POST	Boy	1	1	1	1	1	0	1	0	0.75
896	2018	2018-05-17	9	Primary	POST	Girl	1	1	1	1	1	0	0	0	0.625
897	2018	2018-05-17	8	Primary	POST	Boy	1	1	1	0	1	1	0	1	0.75
898	2018	2018-05-22	16	Secondary	PRE	Girl	0	1	1	0	1	0	0	0	0.375
899	2018	2018-05-22	15	Secondary	PRE	Boy	0	1	1	0	0	0	0	0	0.25
900	2018	2018-05-22	15	Secondary	PRE	Girl	0	1	1	0	0	1	0	1	0.5
901	2018	2018-05-22	15	Secondary	PRE	Girl	0	1	1	1	0	0	1	0	0.5
902	2018	2018-05-22	15	Secondary	PRE	Boy	0	1	1	1	1	0	1	0	0.625
903	2018	2018-05-22	15	Secondary	PRE	Girl	0	0	0	0	1	1	0	0	0.25
904	2018	2018-05-22	14	Secondary	PRE	Girl	0	0	1	1	0	1	0	0	0.375
905	2018	2018-05-22	14	Secondary	PRE	Girl	0	1	1	1	1	0	0	0	0.5
906	2018	2018-05-22	14	Secondary	PRE	Boy	1	1	1	1	0	0	0	0	0.5
907	2018	2018-05-22	14	Secondary	PRE	Girl	1	1	1	1	0	0	0	0	0.5
908	2018	2018-05-22	14	Secondary	PRE	Girl	0	1	1	0	1	0	1	0	0.5
909	2018	2018-05-22	14	Secondary	PRE	Girl	0	1	1	1	0	0	0	1	0.5
910	2018	2018-05-22	16	Secondary	PRE	Boy	1	1	1	1	0	0	0	1	0.625
911	2018	2018-05-22	15	Secondary	PRE	Boy	0	1	0	0	0	0	0	0	0.125
912	2018	2018-05-22	15	Secondary	PRE	Boy	0	1	1	0	1	0	0	0	0.375
913	2018	2018-05-22	15	Secondary	PRE	Boy	0	1	0	1	0	0	1	0	0.375
914	2018	2018-05-22	15	Secondary	POST	Boy	1	1	1	1	0	1	0	0	0.625
915	2018	2018-05-22	14	Secondary	POST	Girl	1	1	1	1	1	1	0	1	0.875
916	2018	2018-05-22	15	Secondary	POST	Girl	1	1	1	1	0	1	0	1	0.75
917	2018	2018-05-22	15	Secondary	POST	Boy	0	1	0	1	0	1	0	1	0.5
918	2018	2018-05-22	16	Secondary	POST	Boy	0	1	1	1	0	1	0	0	0.5
919	2018	2018-05-22	17	Secondary	POST	Boy	0	1	1	1	0	1	0	1	0.625
920	2018	2018-05-22	16	Secondary	POST	Boy	0	1	1	1	1	1	0	1	0.75
921	2018	2018-05-22	15	Secondary	POST	Boy	1	1	1	1	0	0	0	1	0.625
922	2018	2018-05-22	14	Secondary	POST	Boy	1	1	1	0	1	0	0	0	0.5
923	2018	2018-05-22	15	Secondary	POST	Boy	1	1	1	1	0	0	0	1	0.625
924	2018	2018-05-22	15	Secondary	POST	Boy	1	1	1	1	1	1	0	0	0.75
925	2018	2018-05-28	9	Primary	PRE	Boy	1	0	0	0	1	0	1	0	0.375
926	2018	2018-05-28	9	Primary	PRE	Girl	0	1	1	1	1	0	0	0	0.5
927	2018	2018-05-28	9	Primary	PRE	Girl	1	1	1	0	1	1	1	0	0.75
928	2018	2018-05-28	9	Primary	PRE	Girl	0	1	1	1	0	0	1	0	0.5
929	2018	2018-05-28	9	Primary	PRE	Girl	1	0	1	1	0	0	0	0	0.375
930	2018	2018-05-28	8	Primary	PRE	Boy	1	1	0	0	0	1	0	0	0.375
931	2018	2018-05-28	8	Primary	PRE	Boy	1	0	1		1	0	0	0	0.375
932	2018	2018-05-28	8	Primary	PRE	Boy	1	1	1	0	0	1	0	0	0.5
933	2018	2018-05-28	9	Primary	PRE	Girl	0	1	1	1	0	0	0	0	0.375
934	2018	2018-05-28	8	Primary	PRE	Girl	1	1	1	0	0	0	0	0	0.375
935	2018	2018-05-28	8	Primary	PRE	Boy	1	0	1	1	0	1	0	0	0.5
936	2018	2018-05-28	8	Primary	PRE	Girl	0	1	0	1	0	0	0	1	0.375
937	2018	2018-05-28	9	Primary	PRE	Girl	0	1	1	1	0	0	0	0	0.375
938	2018	2018-05-28	8	Primary	PRE	Boy	1	0	1	1	0	1	0	0	0.5
939	2018	2018-05-28	10	Primary	PRE	Boy	0	1	1	1	1	0	0	0	0.5
940	2018	2018-05-28	9	Primary	PRE	Boy	1	1	0	1	1	0	0	1	0.625
941	2018	2018-05-28	9	Primary	PRE	Boy	1	0	1	1	0	0	1	1	0.625
942	2018	2018-05-28	11	Primary	PRE	Girl	0	1	1	0	0	1	0	0	0.375
943	2018	2018-05-28	9	Primary	POST	Boy	1	1	1	1	1	1	0	1	0.875
944	2018	2018-05-28	9	Primary	POST	Boy	1	1	1	0	0	1	0	0	0.5
945	2018	2018-05-28	10	Primary	POST	Girl	1	1	1	1	0	1	0	1	0.75
946	2018	2018-05-28	9	Primary	POST	Girl	1		1	1	0	1	0	0	0.5
947	2018	2018-05-28	10	Primary	POST	Boy	0	1	1	1	0	1	0	1	0.625
948	2018	2018-05-28	10	Primary	POST	Boy	1	1	1	0	1	1	0	1	0.75
949	2018	2018-05-28	10	Primary	POST	Girl	1	1	1	0	1	1	0	0	0.625
950	2018	2018-05-28	9	Primary	POST	Boy	1	1	1	0	0	1	0	1	0.625
951	2018	2018-05-28	10	Primary	POST	Boy	1	1	1	1	1	1	0	1	0.875
952	2018	2018-05-28	9	Primary	POST	Boy	1	1	1	0	1	1	0	1	0.75
953	2018	2018-05-31	15	Secondary	PRE	Girl	0	1	1	0	0	0	1	1	0.5
954	2018	2018-05-31	14	Secondary	PRE	Girl	0	1	1	0	0	0	1	1	0.5
955	2018	2018-05-31	14	Secondary	PRE	Girl	0	1	1	0	0	0	1	1	0.5
956	2018	2018-05-31	14	Secondary	PRE	Boy	0	1	1	1	0	0	0	0	0.375
957	2018	2018-05-31	14	Secondary	PRE	Boy	0	1	1	0	0	0	1	1	0.5
958	2018	2018-05-31	14	Secondary	PRE	Boy	0	1	1	0	0	0	1	0	0.375
959	2018	2018-05-31	14	Secondary	PRE	Girl	0	1	1	1	0	1	0	1	0.625
960	2018	2018-05-31	14	Secondary	PRE	Girl	0	1	0	0	0	1	1	0	0.375
961	2018	2018-05-31	15	Secondary	PRE	Boy	0	1	1	0	0	1	0	0	0.375
962	2018	2018-05-31	14	Secondary	PRE	Boy	0	1	1	1	0	0	0	1	0.5
963	2018	2018-05-31	15	Secondary	PRE	Boy	0	1	1	1	0	0	0	0	0.375
964	2018	2018-05-31	14	Secondary	PRE	Boy	0	1	0	0	0	1	0	0	0.25
965	2018	2018-05-31	14	Secondary	PRE	Boy	0	0	0	0	0	0	1	1	0.25
966	2018	2018-05-31	15	Secondary	PRE	Boy	0	1	1	0	0	0	0	0	0.25
967	2018	2018-05-31	16	Secondary	PRE	Girl	0	0	1	1	0	0	1	0	0.375
968	2018	2018-05-31	14	Secondary	PRE	Boy	1	1	1	1	0	1	0	1	0.75
969	2018	2018-05-31	14	Secondary	POST	Boy	0	1	1	1	1	1	1	1	0.875
970	2018	2018-05-31	14	Secondary	POST	Boy	0	1	1	1	0	1	0	1	0.625
971	2018	2018-05-31	14	Secondary	POST	Girl	1	1	1	1	1	1	1	1	1
972	2018	2018-05-31	14	Secondary	POST	Girl	1	1	1	1	1	1	1	1	1
973	2018	2018-05-31	15	Secondary	POST	Girl	1	1	1	1	1	1	0	1	0.875
974	2018	2018-05-31	13	Secondary	POST	Girl	1	1	1	1	0	1	1	1	0.875
975	2018	2018-05-31	14	Secondary	POST	Girl	1	1	1	1	1	1	0	1	0.875
976	2018	2018-05-31	15	Secondary	POST	Girl	1	1	1	0	0	1	0	1	0.625
977	2018	2018-05-31	15	Secondary	POST	Boy	1	1	1	1	1	1	1	1	1
978	2018	2018-06-04	11	Primary	POST	Boy	1	1	1	1	1	1	0	1	0.875
979	2018	2018-06-04	10	Primary	POST	Boy	0	1	1	1	1	1	0	1	0.75
980	2018	2018-06-04	11	Primary	POST	Boy	1	1	1	1	1	1	0	1	0.875
981	2018	2018-06-04	10	Primary	POST	Girl	1	1	1	1	1	1	0	1	0.875
982	2018	2018-06-04	10	Primary	POST	Girl	1	1	1	1	1	1	0	1	0.875
983	2018	2018-06-04	10	Primary	POST	Girl	1	1	1	1	1	0	0	1	0.75
984	2018	2018-06-04	11	Primary	POST	Girl	1	1	1	0	1	1		0	0.625
985	2018	2018-06-04	10	Primary	POST	Girl	1	0	1	1	1	1	0	1	0.75
986	2018	2018-06-04	11	Primary	POST	Boy	1	1	1	0	0	1	0	0	0.5
987	2018	2018-06-04	12	Primary	POST	Boy	1	1	1	1	0	1	0	1	0.75
988	2018	2018-06-04	11	Primary	POST	Girl	1	1	1	1	1	1	0	1	0.875
989	2018	2018-06-04	11	Primary	POST	Boy		1	1	1		0		1	0.5
990	2018	2018-06-04	11	Primary	POST	Boy		1	1	1		0		1	0.5
991	2018	2018-06-04	11	Primary	POST	Boy	1	1	1	1	1	0	0	1	0.75
992	2018	2018-06-04	11	Primary	POST	Boy	0	1	1	0	0	0	0	1	0.375
993	2018	2018-06-04	10	Primary	POST	Girl	1	1	1	1	1	1	0	1	0.875
994	2018	2018-06-04	10	Primary	POST	Boy	1	1	1	1	1	1	0	1	0.875
995	2018	2018-06-04	11	Primary	POST	Girl	1	1	1	1	1	1	1	1	1
996	2018	2018-06-04	10	Primary	POST	Boy	1	1	1	1	0	1	0	1	0.75
997	2018	2018-06-14	14	Secondary	POST	Boy	1	1	1	1	1	1	0	1	0.875
998	2018	2018-06-14	15	Secondary	POST	Girl	0	1	1	1	1	1	0	1	0.75
999	2018	2018-06-14	15	Secondary	POST	Girl	1	1	1	1	1	1	0	1	0.875
1000	2018	2018-06-14	14	Secondary	POST	Girl	1	1	1	1	0	1	0	1	0.75
1001	2018	2018-06-14	15	Secondary	POST	Girl	1	1	1	1	1	1	0	1	0.875
1002	2018	2018-06-14	15	Secondary	POST	Girl	1	1	1	1	1	1	0	1	0.875
1003	2018	2018-06-14	15	Secondary	POST	Boy	1	1	1	1	1	1	0	1	0.875
1004	2018	2018-06-14	15	Secondary	POST	Girl	1	1	1	1	1	1	0	1	0.875
1005	2018	2018-06-14	15	Secondary	POST	Girl	1	1	1	1	0	1	0	1	0.75
1006	2018	2018-06-14	14	Secondary	POST	Boy	1	1	1	1	1	1	1	1	1
1007	2018	2018-06-14	15	Secondary	POST	Boy	1	1	1	1	1	1	0	1	0.875
1008	2018	2018-06-14	14	Secondary	POST	Girl	1	1	1	0	1	1	0	0	0.625
1009	2018	2018-06-14	14	Secondary	POST	Girl	1	1	1	1	1	1	0	1	0.875
1010	2018	2018-06-14	14	Secondary	POST	Boy	1	1	1	1	1	1	1	1	1
1011	2018	2018-06-14	15	Secondary	POST	Boy	1	1	0	0	0	1	0	0	0.375
1012	2018	2018-06-14	14	Secondary	POST	Boy	1	1	1	1	1	1	0	1	0.875
1013	2018	2018-06-14	15	Secondary	POST	Boy	1	1	1	1	1	1	0	1	0.875
1014	2018	2018-10-16	14	Secondary	POST	Girl	0	1	1	1	1	0	0	1	0.625
1015	2018	2018-10-16	14	Secondary	POST	Boy	1	1	1	1	1	1	0	1	0.875
1016	2018	2018-10-16	14	Secondary	POST	Girl	1	1	1	1	1	1	0	1	0.875
1017	2018	2018-10-16	14	Secondary	POST	Boy	1	1	1	1	0	1	0	1	0.75
1018	2018	2018-10-16	14	Secondary	POST	Girl	1	1	1	1	1	1	0	1	0.875
1019	2018	2018-10-16	14	Secondary	POST	Boy	1	1	1	1	1	1	0	1	0.875
1020	2018	2018-10-16	14	Secondary	POST	Girl	1	1	1	1	1	1	0	1	0.875
1021	2018	2018-10-16	14	Secondary	POST	Boy	1	1	1	1	1	1	0	1	0.875
1022	2018	2018-10-16	14	Secondary	POST	Boy	1	1	1	1	1	1	0	1	0.875
1023	2018	2018-10-16	14	Secondary	POST	Girl	1	1	1	1	1	1	0	1	0.875
1024	2019	2019-02-15	8	Primary	POST	Boy	1	1	1	0	1	1	1	0	0.75
1025	2019	2019-02-15	8	Primary	POST	Boy	1	1	1	0	1	1	1	1	0.875
1026	2019	2019-02-15	8	Primary	POST	Boy	1	1	1	0	1	1	1	1	0.875
1027	2019	2019-02-15	8	Primary	POST	Girl	1	1	1	1	1	1	1	1	1
1028	2019	2019-02-15	8	Primary	POST	Girl	1	1	1	1	1	1	1	0	0.875
1029	2019	2019-02-15	8	Primary	POST	Boy	1	1	1	0	1	1	1	1	0.875
1030	2019	2019-02-15	8	Primary	POST	Girl	0	1	1	0	0	1	1	0	0.5
1031	2019	2019-02-15	9	Primary	POST	Boy	1	1	1	1	1	1	1	0	0.875
1032	2019	2019-02-15	8	Primary	POST	Girl	1	1	1	0	1	1	1	1	0.875
1033	2019	2019-02-15	8	Primary	POST	Girl	1	1	1	0	1	1	1	1	0.875
1034	2019	2019-02-15	8	Primary	POST	Boy	1	1	1	0	1	1	1	1	0.875
1035	2019	2019-02-15	8	Primary	POST	Boy	1	1	1	1	1	1	0	1	0.875
1036	2019	2019-02-15	8	Primary	POST	Girl	1	1	1	0	1	1	1	1	0.875
1037	2019	2019-03-22	8	Primary	PRE	Boy	0	1	0	0	0	0	0	1	0.25
1038	2019	2019-03-22	9	Primary	PRE	Boy	0	1	0	0	0	0	1	1	0.375
1039	2019	2019-03-22	8	Primary	PRE	Boy	0	0	0	0	0	0	1	1	0.25
1040	2019	2019-03-22	8	Primary	PRE	Boy	0	0	1	0	1	1	1	0	0.5
1041	2019	2019-03-22	8	Primary	PRE	Girl	0	1	1	1	1	0	1		0.625
1042	2019	2019-03-22	8	Primary	PRE	Girl	0	1	0	0	0	0	0	0	0.125
1043	2019	2019-03-22	8	Primary	PRE	Girl	0	0	1	0	0	0	0	0	0.125
1044	2019	2019-03-22	8	Primary	PRE	Girl	1	1	1	0	1	0	0	0	0.5
1045	2019	2019-03-22	8	Primary	PRE	Girl	1	1	0	0	0	1	0	1	0.5
1046	2019	2019-03-22	8	Primary	PRE	Boy	0	1	0	1	1	0	1	0	0.5
1047	2019	2019-03-22	8	Primary	PRE	Girl	0	1	0	1	0	0	0	0	0.25
1048	2019	2019-03-22	9	Primary	PRE	Girl	1	1	1	0	1	0	0	1	0.625
1049	2019	2019-03-22	9	Primary	PRE	Girl	0	1	0	0	0	0	0	0	0.125
1050	2019	2019-03-22	8	Primary	PRE	Girl	0	1	0	1	1	1	1	0	0.625
1051	2018	2018-03-22	9	Primary	POST	Girl	1	1	1	0	1	0	0	1	0.625
1052	2018	2018-03-22	9	Primary	POST	Girl	1	1	1	0	1	0	1	0	0.625
1053	2018	2018-03-22	9	Primary	POST	Girl	1	1	1	1	1	1	0	0	0.75
1054	2018	2018-03-22	10	Primary	POST	Girl	1	1	1	0	1	1	0	0	0.625
1055	2018	2018-03-22	10	Primary	POST	Boy	0	1	1	1	1	1	0	1	0.75
1056	2018	2018-03-22	9	Primary	POST	Boy	0	1	1	0	1	1	1	1	0.75
1057	2018	2018-03-22	9	Primary	POST	Girl	1	1	1	1	0	1	0	0	0.625
1058	2018	2018-03-22	9	Primary	POST	Boy	1	1	1	1	0	1	1	1	0.875
1059	2018	2018-03-22	9	Primary	POST	Girl	1	1	1	0	1	0	0	1	0.625
1060	2018	2018-03-22	9	Primary	POST	Boy	1	1	1	1	1	1	0	1	0.875
1061	2018	2018-03-22	9	Primary	POST	Girl	1	1	1	1	0	0	0	1	0.625
1062	2018	2018-03-22	9	Primary	POST	Girl	1	1	1	1	0	1	0	1	0.75
1063	2018	2018-03-22	9	Primary	POST	Girl	1	1	1	1	1	1	0	0	0.75
1064	2018	2018-03-22	10	Primary	POST	Girl	1	1	1	0	1	1	0	1	0.75
1065	2018	2018-03-22	9	Primary	POST	Girl	1	1	1	1	1	1	1	1	1
1066	2018	2018-03-22	9	Primary	POST	Girl	1	1	1	0	1	0	0	1	0.625
1067	2018	2018-03-22	10	Primary	POST	Girl	1	1	1	0	1	1	0	1	0.75
1068	2018	2018-03-22	9	Primary	POST	Girl	1	1	1	1	1	1	0	1	0.875
1069	2018	2018-03-22	9	Primary	POST	Girl	1	1	0	0	0	1	0	1	0.5
1070	2018	2018-03-22	10	Primary	POST	Girl	1	1	1	1	1	1	0	0	0.75
1071	2018	2018-03-22	9	Primary	POST	Girl	1	1	1	0	1	1	0	0	0.625
1072	2018	2018-03-22	9	Primary	POST	Girl	1	1	1	1	0	1	0	1	0.75
1073	2018	2018-03-22	9	Primary	POST	Boy	1	1	1	1	0	0	0	0	0.5
1074	2018	2018-03-22	9	Primary	POST	Boy	1	1	1	1	0	1	1	1	0.875
1075	2018	2018-03-22	9	Primary	POST	Girl	1	1	1	1	0	1	0	1	0.75
1076	2018	2018-03-22	9	Primary	POST	Boy	1	1	1	0	0	1	0	0	0.5
1077	2018	2018-03-22	9	Primary	POST	Boy	1	1	1	1	1	1	1	1	1
1078	2019	2019-03-22	8	Primary	POST	Girl	1	1	1	1	0	1	1	0	0.75
1079	2019	2019-03-22	8	Primary	POST	Boy	1	1	1	0	1	1	1	1	0.875
1080	2019	2019-03-22	9	Primary	POST	Boy	1	1	1	0	1	1	0	0	0.625
1081	2019	2019-03-22	8	Primary	POST	Girl	1	1	1	0	1	1	0	1	0.75
1082	2019	2019-03-22	9	Primary	POST	Boy	1	0	1	0	1	1	1	0	0.625
1083	2019	2019-03-22	8	Primary	POST	Boy	1	1	1	1	1		1	0	0.75
1084	2019	2019-03-22	8	Primary	POST	Boy	0	1	1	0	1	1	1	1	0.75
1085	2019	2019-03-22	8	Primary	POST	Boy	1	1	1	0	1	0	0	0	0.5
1086	2019	2019-03-22	9	Primary	POST	Girl	1	1	1	0	1	0	0	0	0.5
1087	2019	2019-03-22	8	Primary	POST	Girl	0	1	1	1	1	0	0	0	0.5
1088	2019	2019-03-22	9	Primary	POST	Boy	0	1	1	0	1	0	1	0	0.5
1089	2019	2019-03-22	8	Primary	POST	Girl	1	1	1	0	1	0	1	0	0.625
1090	2019	2019-03-22	8	Primary	POST	Boy	1	0	1	0	1	0	0	0	0.375
1091	2019	2019-03-22	9	Primary	POST	Girl	1	1	1	0	1	0	0	0	0.5
1092	2019	2019-03-22	8	Primary	POST	Boy	1	1	1	0	1	0	0	1	0.625
1093	2019	2019-03-22	8	Primary	POST	Girl	1	1	0	0	1	0	1	0	0.5
1094	2019	2019-03-22	8	Primary	POST	Boy	1	1	1	0	1	1	0	0	0.625
1095	2019	2019-03-22	8	Primary	POST	Girl	1	1	1	0	1	0	0	0	0.5
1096	2019	2019-03-22	9	Primary	POST	Girl	1	1	1	0	1	0	0	1	0.625
1097	2019	2019-03-22	9	Primary	POST	Boy	1	1	1	0	1	0	0	0	0.5
1098	2019	2019-03-22	8	Primary	POST	Boy	1	1	1	0	1	0	0	1	0.625
1099	2019	2019-03-22	9	Primary	POST	Girl	1	1	1	1	1	1	1	0	0.875
1100	2019	2019-03-22	8	Primary	POST	Girl	1	1	1	0	1	0	0	1	0.625
1101	2019	2019-03-22	8	Primary	POST	Girl	0	1	1	1	1	0	0	1	0.625
1102	2019	2019-03-22	8	Primary	POST	Boy	0	0	1	0	0	0	0	1	0.25
1103	2019	2019-04-01	12	Secondary	POST	Boy	1	1	1	1	1	1	0	1	0.875
1104	2019	2019-04-01	13	Secondary	POST	Girl	1	1	1	1	1	0	0	1	0.75
1105	2019	2019-04-01	13	Secondary	POST	Girl	1	1	1	1	1	0	0	1	0.75
1106	2019	2019-04-01	13	Secondary	POST	Boy	1	1	1	0	1	1	0	1	0.75
1107	2019	2019-04-01	13	Secondary	POST	Girl	1	1	1	0	0	0	1	1	0.625
1108	2019	2005-06-03	13	Secondary	POST	Boy	1	0	1	1	1	0	1	1	0.75
1109	2019	2019-04-01	13	Secondary	POST	Girl	1	1	1	1	1	0	0	1	0.75
1110	2019	2019-04-01	12	Secondary	POST	Boy	1	1	1	1	1	1	0	1	0.875
1111	2019	2019-04-01	13	Secondary	POST	Girl	1	1	1	0	1	0	0	1	0.625
1112	2019	2019-04-01	12	Secondary	POST	Boy	1	1	1	1	1	1	0	1	0.875
1113	2019	2019-04-01	13	Secondary	POST	Boy	1	1	1	0	0	1	0	0	0.5
1114	2019	2019-04-01	13	Secondary	POST	Boy	0	1	1	0	1	1	1	1	0.75
1115	2019	2019-04-01	12	Secondary	POST	Boy	1	1	1	1	0	0	0	1	0.625
1116	2019	2019-04-01	13	Secondary	POST	Girl	1	1	1	0	0	0	0	1	0.5
1117	2019	2019-04-01	12	Secondary	POST	Girl	1	1	1	1	1	1	0	1	0.875
1118	2019	2019-04-01	12	Secondary	POST	Boy	1	1	1	1	1	1	0	1	0.875
1119	2019	2019-04-01	13	Secondary	POST	Girl	1	1	1	1	1	1	0	1	0.875
1120	2019	2019-04-01	12	Secondary	POST	Boy	0	1	0	0	1	1	1	1	0.625
1121	2019	2019-04-01	13	Secondary	POST	Girl	0	1	1	1	1	1	0	1	0.75
1122	2019	2019-04-01	12	Secondary	POST	Girl	1	1	1	1	1	1	0	1	0.875
1123	2019	2019-04-01	13	Secondary	POST	Girl	1	1	1	1	1	1	0	1	0.875
1124	2019	2019-04-01	13	Secondary	POST	Boy	1	1	1	1	1	1	0	1	0.875
1125	2019	2019-04-01	12	Secondary	POST	Girl	1	1	1	1	1	1	0	1	0.875
1126	2019	2019-04-01	12	Secondary	POST	Girl	1	1	1	1	1	1	0	1	0.875
1127	2019	2019-04-01	12	Secondary	POST	Girl	1	1	1	1	1	1	0	1	0.875
1128	2019	2019-04-01	12	Secondary	POST	Boy	1	0	1	1	0	1	0	1	0.625
1129	2019	2019-04-01	12	Secondary	POST	Girl	0	0	0	0	0	0	1	1	0.25
1130	2019	2019-04-24	8	Primary	POST	Girl	0	1	1	1	1	1	0	1	0.75
1131	2019	2019-04-24	10	Primary	POST	Boy	1	1	1	1	1	1	0	0	0.75
1132	2019	2019-04-24	9	Primary	POST	Girl	1	1	1	1	1	1	0	1	0.875
1133	2019	2019-04-24	9	Primary	POST	Girl	1	1	1	1	1	1	0	1	0.875
1134	2019	2019-04-24	8	Primary	POST	Girl	1	1	1	1	1	0	0	1	0.75
1135	2019	2019-04-24	10	Primary	POST	Boy	0	1	0	1					0.25
1136	2019	2019-04-24	10	Primary	POST	Girl	0	1	1	0	1	1	0	0	0.5
1137	2019	2019-04-24	8	Primary	POST	Boy	0	1	1	0	1	1	0	1	0.625
1138	2019	2019-04-24	10	Primary	POST	Girl	1	1	1	0	1		1	0	0.625
1139	2019	2019-04-24	10	Primary	POST	Girl	1	1	1	0	1	0	1	1	0.75
1140	2019	2019-04-24	8	Primary	POST	Girl	1	1	1	0	1	1	1	1	0.875
1141	2019	2019-04-24	9	Primary	POST	Boy	1	1	1	1	1	0	0	1	0.75
1142	2019	2019-04-24	8	Primary	POST	Girl	1	1	1	0	1	0	1	1	0.75
1143	2019	2019-04-24	8	Primary	POST	Girl	1	1	1	0	1	1	1	1	0.875
1144	2019	2019-04-24	8	Primary	POST	Girl	1	1	1	1	1	1	1	1	1
1145	2019	2019-04-24	8	Primary	POST	Girl	1	1	1	1	1	1	1	1	1
1146	2019	2019-04-24	10	Primary	POST	Boy	1	1	1	1	1	1	1	0	0.875
1147	2019	2019-04-24	10	Primary	POST	Boy	1	1	1	0	1	1	0	0	0.625
1148	2019	2019-04-24	10	Primary	POST	Boy	1	1	1	0	1	1	0	0	0.625
1149	2019	2019-04-24	9	Primary	POST	Girl	1	1	1	0	1	1	0	1	0.75
1150	2019	2019-04-24	8	Primary	POST	Boy	1	1	1	0	1	1	1	0	0.75
1151	2019	2019-04-24	8	Primary	POST	Boy	1	1	1	0	1	0	1	0	0.625
1152	2019	2019-04-24	10	Primary	POST	Boy	1	1	1	0	1	1	0	0	0.625
1153	2019	2019-04-24	9	Primary	POST	Girl	1	1	1	1	1	0	0	0	0.625
1154	2019	2019-04-24	8	Primary	POST	Boy	1	1	1	1	1	1	0	1	0.875
1155	2019	2019-04-24	8	Primary	POST	Girl	1	1	1	0	1	1	0	0	0.625
1156	2019	2019-04-24	9	Primary	POST	Girl	1	1	1	1	1	1	0	1	0.875
1157	2019	2019-04-24	8	Primary	POST	Girl	1	1	1	0	1	1	1	1	0.875
1158	2019	2019-04-24	9	Primary	POST	Girl	1	1	1	1	1	1	0	1	0.875
1159	2019	2019-04-24	9	Primary	POST	Boy	1	1	1	0	1	1	0	1	0.75
1160	2019	2019-04-24	8	Primary	POST	Girl	1	1	1	0	1	1	1	1	0.875
1161	2019	2019-04-24	9	Primary	POST	Boy	1	1	1	1	1	1	1	1	1
1162	2019	2019-04-24	9	Primary	POST	Boy	1	1	1	1	1	1	1	1	1
1163	2019	2019-04-24	8	Primary	POST	Girl	1	1	1	1	1	1	0	1	0.875
1164	2019	2019-04-24	9	Primary	POST	Girl	1	1	1	0	1	1	0	1	0.75
1165	2019	2019-04-24	8	Primary	POST	Boy	1	1	1	1	1	1	0	1	0.875
1166	2019	2019-04-24	9	Primary	POST	Girl	1	1	1	0	1	1	0	1	0.75
1167	2019	2019-04-24	9	Primary	POST	Boy	1	1	1	1	1	1	1	1	1
1168	2019	2019-04-24	8	Primary	POST	Boy	0	0	1	1	1	1	1	0	0.625
1169	2019	2019-04-24	9	Primary	POST	Girl	1	1	1	1	1	0	0	0	0.625
1170	2019	2019-04-24	10	Primary	POST	Boy	1	1	1	1	1	1	1	1	1
1171	2019	2019-04-24	10	Primary	POST	Boy	1	1	1	1	1	1	1	1	1
1172	2019	2019-04-24	8	Primary	POST	Girl	1	1	1	0	1	1	1	1	0.875
1173	2019	2019-04-24	9	Primary	POST	Boy	0	0	0	1	1	0	0	1	0.375
1174	2019	2019-04-24	8	Primary	POST	Girl	1	1	1	0	1	0	1	1	0.75
1175	2019	2019-04-24	8	Primary	POST	Boy	1	1	1	1	1	0	0	1	0.75
1176	2019	2019-04-24	9	Primary	POST	Boy	1	1	1	1	1	1	0	1	0.875
1177	2019	2019-04-25	12	Secondary	POST	Boy	1	1	1	1	1	1	0	1	0.875
1178	2019	2019-04-25	12	Secondary	POST	Boy	1	1	1	1	1	1	0	1	0.875
1179	2019	2019-04-25	12	Secondary	POST	Girl	1	1	1	1	1	0	1	1	0.875
1180	2019	2019-04-25	12	Secondary	POST	Boy	1	1	1	1	0	1	0	1	0.75
1181	2019	2019-04-25	12	Secondary	POST	Girl	1	1	1	1	1	1		1	0.875
1182	2019	2019-04-25	16	Secondary	POST	Girl	1	1	1	1	0	1	0	1	0.75
1183	2019	2019-04-25	13	Secondary	POST	Boy	1	1	1	0	0	0	0	0	0.375
1184	2019	2019-04-25	13	Secondary	POST	Girl	1	1	1	1	0	0	0	1	0.625
1185	2019	2019-04-25	12	Secondary	POST	Boy	1	1	1	1	0	1	0	0	0.625
1186	2019	2019-04-25	13	Secondary	POST	Girl	1	1	1	1	0	1	1	1	0.875
1187	2019	2019-04-25	14	Secondary	POST	Girl	1	1	1	1	1	0	1	1	0.875
1188	2019	2019-04-25	13	Secondary	POST	Boy	1	1	1	1	1	1	0	1	0.875
1189	2019	2019-04-25	12	Secondary	POST	Boy	0	1	1	1	1	0	0	1	0.625
1190	2019	2019-04-25	13	Secondary	POST	Boy	1	1	1	1	0	0	1	1	0.75
1191	2019	2019-04-25	12	Secondary	POST	Boy	1	1	1	1	1	1	0	0	0.75
1192	2019	2019-04-25	13	Secondary	POST	Girl	1	1	1	1	1	1	0	1	0.875
1193	2019	2019-04-23	13	Secondary	POST	Boy	1	1	1	1	1	1	0	1	0.875
1194	2019	2019-04-25	13	Secondary	POST	Girl	1	1	1	1	1			1	0.75
1195	2019	2019-04-25	13	Secondary	POST	Girl	1	1	1	1	0	1	0	1	0.75
1196	2019	2019-04-25	12	Secondary	POST	Girl	1	1	1	1	1	1	0	1	0.875
1197	2019	2019-04-25	13	Secondary	POST	Girl	1	1	1	1	1	1	0	1	0.875
1198	2019	2019-04-25	13	Secondary	POST	Girl	1	1	1	0	1	1	0	1	0.75
1199	2019	2019-04-25	12	Secondary	POST	Girl	1	1	1	1	1	1	0	1	0.875
1200	2019	2019-04-25	13	Secondary	POST	Boy	1	1	1	1	1	1	1	0	0.875
1201	2019	2019-04-25	13	Secondary	POST	Boy	1	1	1	1	0	0	0	1	0.625
1202	2019	2019-04-25	13	Secondary	POST	Boy	1	1	1	0	1	1	0	1	0.75
1203	2019	2019-04-25	12	Secondary	POST	Boy	1	1	1	1	1	1	0	1	0.875
1204	2019	2019-04-25	12	Secondary	POST	Boy	1	1	1	1	1	1	0	1	0.875
1205	2019	2019-04-25	12	Secondary	POST	Boy	0	1	1	1	1	1	0	1	0.75
1206	2019	2019-04-25	16	Secondary	POST	Boy	1	1	1	1	1	1	1	0	0.875
1207	2019	2019-04-25	13	Secondary	POST	Girl	1	1	1	1	0	1	0	1	0.75
1208	2019	2019-04-25	13	Secondary	POST	Girl	1	1	1	1	1	1	0	1	0.875
1209	2019	2019-04-25	12	Secondary	POST	Boy	1	1	1	1	1	1	0	1	0.875
1210	2019	2019-04-25	12	Secondary	POST	Girl	1	1	1	1	1	1	0	1	0.875
1211	2019	2019-04-25	13	Secondary	POST	Boy	1	1	1	0	0	1	0	1	0.625
1212	2019	2019-04-25	13	Secondary	POST	Boy	0	1	1	0	1	0	0	1	0.5
1213	2019	2019-04-25	12	Secondary	POST	Girl	1	1	1	1	1	1	1	1	1
1214	2019	2019-04-25	12	Secondary	POST	Girl	1	1	1	1	0	0	0	1	0.625
1215	2019	2019-04-25	13	Secondary	POST	Boy	1	1	1	1	1	1	1	1	1
1216	2019	2019-04-25	13	Secondary	POST	Boy	1	1	1	1	1	1	0	1	0.875
1217	2019	2019-04-25	12	Secondary	POST	Girl	1	1	1	1	1	1	0	1	0.875
1218	2019	2019-04-25	13	Secondary	POST	Boy	1	1	1	1	1	1	0	1	0.875
1219	2019	2019-04-25	13	Secondary	POST	Boy	1	1	1	1	1	0	0	1	0.75
1220	2019	2019-04-25	12	Secondary	POST	Girl	1	1	1	1	0	0	0	1	0.625
1221	2019	2019-04-26	12	Secondary	POST	Girl	1	1	1	1	1	0	0	1	0.75
1222	2019	2019-04-26	13	Secondary	POST	Boy	1	1	1	1	1	0	0	1	0.75
1223	2019	2019-04-26	12	Secondary	POST	Girl	0	1	1	1	1	0	1	1	0.75
1224	2019	2019-04-26	12	Secondary	POST	Girl	1	1	1	1	0	1	0	1	0.75
1225	2019	2019-04-26	12	Secondary	POST	Girl	1	1	1	1	1	1	0	1	0.875
1226	2019	2019-04-26	12	Secondary	POST	Girl	1	1	1	0	1	1	0	1	0.75
1227	2019	2019-04-26	12	Secondary	POST	Girl	1	0	1	1	1	1	0	1	0.75
1228	2019	2019-04-26	12	Secondary	POST	Girl	1		1	1	0	0	1	0	0.5
1229	2019	2019-04-26	12	Secondary	POST	Girl	1	1	1	1	1	1	0	1	0.875
1230	2019	2019-04-26	13	Secondary	POST	Boy	1	1	1	1	0	1	1	1	0.875
1231	2019	2019-04-26	13	Secondary	POST	Girl	1	1	1	1	1	1	0	1	0.875
1232	2019	2019-04-26	12	Secondary	POST	Girl	1	1	1	1	1	0	1	1	0.875
1233	2019	2019-04-26	13	Secondary	POST	Girl	1	1	1	1	1	0	1	1	0.875
1234	2019	2019-04-26	13	Secondary	POST	Girl	1	1	1	1	0	1	0	1	0.75
1235	2019	2019-04-26	12	Secondary	POST	Boy	1	1	1	1	1	0	0	1	0.75
1236	2019	2019-04-26	12	Secondary	POST	Girl	1	1	1	1	1	0	0	1	0.75
1237	2019	2019-04-26	13	Secondary	POST	Boy	1		1	0	1	0	0	1	0.5
1238	2019	2019-04-26	12	Secondary	POST	Girl	1	1	1	0	1	0	1	1	0.75
1239	2019	2019-04-26	12	Secondary	POST	Girl	1	1	1	1	1	0	0	1	0.75
1240	2019	2019-04-26	12	Secondary	POST	Boy	0	0	0	1	1	0	0	1	0.375
1241	2019	2019-04-26	13	Secondary	POST	Girl	1	1	1	1	1	1	1	1	1
1242	2019	2019-04-26	12	Secondary	POST	Boy	1	1	1	0	1	0	0		0.5
1243	2019	2019-04-26	13	Secondary	POST	Boy	1	1	1	1	0	0		0	0.5
1244	2019	2019-04-26	13	Secondary	POST	Girl	1	1	1	0	1	0	0	1	0.625
1245	2019	2019-04-26	12	Secondary	POST	Girl	1	1	1	0	1	0	0	1	0.625
1246	2019	2019-04-26	12	Secondary	POST	Boy	1	1	1	0		0	0	1	0.5
1247	2019	2019-05-07	15	Secondary	POST	Boy	1	1	1	1	0	0	1	0	0.625
1248	2019	2019-05-07	14	Secondary	POST	Boy	1	0	1	0	0	1	0	0	0.375
1249	2019	2019-05-07	14	Secondary	POST	Boy	1	1	1	1	1	1	0	1	0.875
1250	2019	2019-05-07	14	Secondary	POST	Boy	1	1	1	1	0	1	0	1	0.75
1251	2019	2019-05-07	16	Secondary	POST	Girl	1	1	1	1	1	1	0	1	0.875
1252	2019	2019-05-07	15	Secondary	POST	Girl	1	1	1	1	1	1	0	1	0.875
1253	2019	2019-05-07	15	Secondary	POST	Boy	1	1	1	1	1	1	1	1	1
1254	2019	2019-05-07	15	Secondary	POST	Boy	0	1	1	1	1	1	1	0	0.75
1255	2019	2019-05-07	14	Secondary	POST	Boy	1	1	1	1	0	0		0	0.5
1256	2019	2019-05-07	14	Secondary	POST	Boy	1	1	1	1	0	1	0	0	0.625
1257	2019	2019-05-07	15	Secondary	POST		1	1	1	0	1	1	0	0	0.625
1258	2019	2019-05-07	14	Secondary	POST	Boy	1	1	1	1	1	0	0	1	0.75
1259	2019	2019-05-07	15	Secondary	POST	Boy	1	1	1	1	1	1	0	1	0.875
1260	2019	2019-05-07	15	Secondary	POST	Boy	1	1	1	0	1	0	0	1	0.625
1261	2019	2019-05-07	14	Secondary	POST	Boy	1	1	1	0	1	1	1	1	0.875
1262	2019	2019-05-07	14	Secondary	POST	Boy	1	1	1	1	1	1	0	1	0.875
1263	2019	2019-05-07	14	Secondary	POST	Boy	0	0	0	0	0	0	0	0	0
1264	2019	2019-05-07	15	Secondary	POST	Boy	1	1	1	1	1	0	0	1	0.75
1265	2019	2019-05-07	15	Secondary	POST	Boy	1	1	1		1	0	1	1	0.75
1266	2019	2019-05-08	12	Secondary	POST	Girl	1	1	1	0	1	1	0	0	0.625
1267	2019	2019-05-08	13	Secondary	POST	Girl	1	1	1	1	1	1	0	0	0.75
1268	2019	2019-05-08	12	Secondary	POST	Girl	1	1	1	1	1	1	0	1	0.875
1269	2019	2019-05-08	12	Secondary	POST	Boy	1	1	1	1	1	0	1	1	0.875
1270	2019	2019-05-08	12	Secondary	POST	Boy	1	1	1	1	1	1	1	1	1
1271	2019	2019-05-08	13	Secondary	POST	Boy	1	1	0	0	1	1	0	0	0.5
1272	2019	2019-05-08	13	Secondary	POST	Girl	1	1	1	1	0	1	0	1	0.75
1273	2019	2019-05-08	13	Secondary	POST	Girl	1	1	1	1	0	1	0	1	0.75
1274	2019	2019-05-08	13	Secondary	POST	Boy	1	1	1	1	1	1	0	1	0.875
1275	2019	2019-05-08	13	Secondary	POST	Girl	1	1	1	1	1	1	0	1	0.875
1276	2019	2019-05-08	12	Secondary	POST	Girl	1	1	1	1	0	1	0	1	0.75
1277	2019	2019-05-08	12	Secondary	POST	Girl	1	1	1	1	1	1	0	1	0.875
1278	2019	2019-05-08	13	Secondary	POST	Girl	1	1	1	1	0	1	0	1	0.75
1279	2019	2019-05-08	12	Secondary	POST	Girl	1	1	1	1	0	1	0	1	0.75
1280	2019	2019-05-08	13	Secondary	POST	Girl	1	1	1		1	1	1	1	0.875
1281	2019	2019-05-08	12	Secondary	POST	Boy	1	1	1	1	1	1	1	1	1
1282	2019	2019-05-08	13	Secondary	POST	Boy	1	1	1	1	0	1	1	1	0.875
1283	2019	2019-05-08	12	Secondary	POST	Girl	1	1	1	1	1	1	1	1	1
1284	2019	2019-05-08	13	Secondary	POST	Girl	1	1	1	1	0	1	0	1	0.75
1285	2019	2019-05-08	13	Secondary	POST	Girl	1	1	1	1	1	1		1	0.875
1286	2019	2019-05-08	13	Secondary	POST	Boy	1	1	1	1	1	1	1	1	1
1287	2019	2019-05-08	12	Secondary	POST	Boy	1	1	1	1	1	1	1	1	1
1288	2019	2019-05-08	12	Secondary	POST	Boy	1	1	1	0	1	1	0	0	0.625
1289	2019	2019-05-08	12	Secondary	POST	Boy	1	1	1	1	1	1	0	1	0.875
1290	2019	2019-05-08	13	Secondary	POST	Girl	1	1	1	1	1	1	0	1	0.875
1291	2019	2019-05-08	13	Secondary	POST	Boy	1	1	1	1	1	1	1	1	1
1292	2019	2019-05-08	13	Secondary	POST	Boy	1	1	1	1	0	1	0	1	0.75
1293	2019	2019-05-08	13	Secondary	POST	Boy	1	1	1	1	1	1	1	1	1
1294	2019	2019-05-08	13	Secondary	POST	Boy	1	1	1	0	1	1	1	1	0.875
1295	2019	2019-05-08	13	Secondary	POST	Boy	1	1	1	0	1	1	1	1	0.875
1296	2019	2019-05-08	12	Secondary	POST	Boy	1	1	1	1	1	0	0	1	0.75
1297	2019	2019-05-08	13	Secondary	POST	Boy	1	1	1	1	1	1	1	1	1
1298	2019	2019-05-08	12	Secondary	POST	Girl	1	1	1	1	1	0	1	1	0.875
1299	2019	2019-05-08	12	Secondary	POST	Girl	1	1	1	1	0	1	1	1	0.875
1300	2019	2019-05-08	13	Secondary	POST	Boy	0	1	1	1	0	1	0	1	0.625
1301	2019	2019-05-08	13	Secondary	POST	Girl	1	1	1	1	1	0	1	0	0.75
1302	2019	2019-05-08	14	Secondary	POST	Girl	1	1	1	1	1	1	0	1	0.875
1303	2019	2019-05-15	13	Secondary	POST	Girl	1	1	1	1	1	0	0	1	0.75
1304	2019	2019-05-15	13	Secondary	POST	Girl	1	1	1	1	1	1	0	1	0.875
1305	2019	2034-05-15	13	Secondary	POST	Girl	1	1	1	0	1	1	0	1	0.75
1306	2019	2034-05-15	13	Secondary	POST	Girl	1	1	1	0	1	1	0	1	0.75
1307	2019	2019-05-15	13	Secondary	POST	Girl	1	1	1	1	1	0	0	1	0.75
1308	2019	2019-05-15	12	Secondary	POST	Girl	1	1	1	1	0	0	0	1	0.625
1309	2019	2019-05-15	12	Secondary	POST	Girl	1	1	1	1	1	1	0	1	0.875
1310	2019	2019-05-15	12	Secondary	POST	Girl	1	1	1	0	1	0	0	1	0.625
1311	2019	2019-05-15	12	Secondary	POST	Girl	1	1	1	1	1	1	0	1	0.875
1312	2019	2019-05-15	13	Secondary	POST	Girl	1	1	1	1	1	0	0	1	0.75
1313	2019	2019-05-15	12	Secondary	POST	Boy	1	1	1	1	1	1	0	1	0.875
1314	2019	2019-05-15	13	Secondary	POST	Boy	1	1	1	1	1	1	0	1	0.875
1315	2019	2019-05-15	13	Secondary	POST	Boy	1	1	1	1	1	1	0	1	0.875
1316	2019	2019-05-15	13	Secondary	POST	Girl	1	1	1	1	0	1	0	1	0.75
1317	2019	2019-05-15	12	Secondary	POST	Girl	1	1	1	1	1	1	0	0	0.75
1318	2019	2019-05-15	13	Secondary	POST	Girl	1	1	1	1	1	1	0	1	0.875
1319	2019	2019-05-15	12	Secondary	POST	Boy	1	1	1	1	1	1	0	1	0.875
1320	2019	2019-05-15	12	Secondary	POST	Girl	1	1	1	1	1	1	0	1	0.875
1321	2019	2019-05-15	12	Secondary	POST	Boy	1	1	1	1	1	1	0	1	0.875
1322	2019	2019-05-15	12	Secondary	POST	Boy	1	1	1	0	1	1	0	1	0.75
1323	2019	2019-05-15	12	Secondary	POST	Girl	1	1	1	1	0	1	0	0	0.625
1324	2019	2019-05-15	12	Secondary	POST	Boy	1	1	1	0	1	1	0	1	0.75
1325	2019	2019-05-15	13	Secondary	POST	Girl	1	1	1	1	1	1	1	0	0.875
1326	2019	2019-05-13	13	Secondary	POST	Girl	1	1	1	1	0	1	0	1	0.75
1327	2019	2019-05-13	12	Secondary	POST	Boy	1	1	1	1	1	1	0	1	0.875
1328	2019	2019-05-13	13	Secondary	POST	Boy	1	1	1	1	1	1	0	1	0.875
1329	2019	2019-05-13	13	Secondary	POST	Girl	1	1	1	1	1	1		0	0.75
1330	2019	2019-05-13	13	Secondary	POST	Girl	1	1	1	1	1	1	0	0	0.75
1331	2019	2019-05-13	13	Secondary	POST	Boy	1	1	1	0	1	1	0	1	0.75
1332	2019	2019-05-13	12	Secondary	POST	Boy	1	1	1	0	1	1	0	1	0.75
1333	2019	2019-05-13	13	Secondary	POST	Girl	1	1	1	1	1	1	0	1	0.875
1334	2019	2019-05-13	14	Secondary	POST	Girl	1	1	1	1	0	1	0	1	0.75
1335	2019	2019-05-13	12	Secondary	POST	Girl	1	1	1	1	1	1	0	1	0.875
1336	2019	2019-05-13	12	Secondary	POST	Girl	1	1	1	1	1	1	0	0	0.75
1337	2019	2019-05-13	13	Secondary	POST	Boy	1	1	1	0	1	1	0	1	0.75
1338	2019	2019-05-13	12	Secondary	POST	Boy	1	1	1	1	1	1	0	1	0.875
1339	2019	2019-05-13	13	Secondary	POST	Boy	1	1	1	1	1	1	0	1	0.875
1340	2019	2019-05-13	12	Secondary	POST	Girl	1	1	1	0	1	1	0	0	0.625
1341	2019	2019-05-13	12	Secondary	POST	Boy	1	1	1	1	1	1	0	1	0.875
1342	2019	2019-05-13	12	Secondary	POST	Boy	1	1	1	1	1	1	0	1	0.875
1343	2019	2019-05-13	13	Secondary	POST	Girl	0	1	1	1	1	1	0	0	0.625
1344	2019	2019-05-21	12	Secondary	POST	Girl	1	1	1	1	1	1	0	1	0.875
1345	2019	2019-05-21	13	Secondary	POST	Girl	1	1	1	1	1	1	0	1	0.875
1346	2019	2019-05-21	13	Secondary	POST	Boy	1	1	1	0	1	1	1	1	0.875
1347	2019	2019-05-21	13	Secondary	POST	Boy	1	1	1	1	1	1	0	1	0.875
1348	2019	2019-05-21	13	Secondary	POST	Boy	1	1	1	1	1	1	0	1	0.875
1349	2019	2019-05-21	13	Secondary	POST	Boy	1	1	1	1	0	1	0	1	0.75
1350	2019	2019-05-21	12	Secondary	POST	Boy	1	1	1	0	0	1	0	0	0.5
1351	2019	2019-05-21	12	Secondary	POST	Girl	1	1	1	1	0	1	0	1	0.75
1352	2019	2019-05-21	13	Secondary	POST	Boy	1	1	1	1	1	1	0	1	0.875
1353	2019	2019-05-21	12	Secondary	POST	Boy	1	1	1	1	1	1	0	1	0.875
1354	2019	2019-05-21	12	Secondary	POST	Boy	1	1	1		1	1	0	1	0.75
1355	2019	2019-05-21	13	Secondary	POST	Boy	0	1	1	0	1	0	0	0	0.375
1356	2019	2006-07-15	12	Secondary	POST	Girl	1	1	1	1	1	1	0	1	0.875
1357	2019	2019-05-21	13	Secondary	POST	Girl	1	1	1	1	1	1	0	1	0.875
1358	2019	2019-05-21	12	Secondary	POST	Boy	1	1	1	1	0	1	0	1	0.75
1359	2019	2019-05-21	12	Secondary	POST	Boy	1	1	1	1	1	1	0	0	0.75
1360	2019	2019-05-21	12	Secondary	POST	Girl	1	0	1	0	1	1	0	1	0.625
1361	2019	2019-05-21	12	Secondary	POST	Girl	1	1	1	1	1	1	0	1	0.875
1362	2019	2019-05-21	13	Secondary	POST	Boy	1	1	1	0	1	1	0	0	0.625
1363	2019	2019-05-21	12	Secondary	POST	Girl	1	1	1	1	1	1	1	0	0.875
1364	2019	2019-05-21	13	Secondary	POST	Girl	1	1	1	1	1	0	0	1	0.75
1365	2019	2019-05-21	12	Secondary	POST	Girl	1	1	1	1	1	0	0	1	0.75
1366	2019	2019-05-21	13	Secondary	POST	Boy	1	1	1	1	1	1	0	0	0.75
1367	2019	2019-05-21	12	Secondary	POST	Girl	1	1	1	0	1	1	0	1	0.75
1368	2019	2019-05-21	13	Secondary	POST	Boy	1	1	1	1	1	1	0	0	0.75
1369	2019	2019-05-21	13	Secondary	POST	Boy	1	1	1	1	1	1	0	0	0.75
1370	2019	2019-05-21	12	Secondary	POST	Girl	1	1	1	1	1	0	1	1	0.875
1371	2019	2019-05-21	12	Secondary	POST	Girl	1	1	1	1	1	1	0	0	0.75
1372	2019	2019-05-21	12	Secondary	POST	Boy	1	1	1	1	0	1	1	1	0.875
1373	2019	2019-05-21	13	Secondary	POST	Boy	1	1	1	1	1	1	0	0	0.75
1374	2019	2019-05-21	12	Secondary	POST	Boy	1	1	1	1	1	1	0	0	0.75
1375	2019	2019-05-21	12	Secondary	POST	Girl	1	1	1	1	1	1	0	1	0.875
1376	2019	2019-05-21	13	Secondary	POST	Girl	1	1	1	1	1	0	1	1	0.875
1377	2019	2019-05-21	13	Secondary	POST	Boy	1	1	1	0	1	1	1	1	0.875
1378	2019	2019-05-21	12	Secondary	POST	Girl	0	1	1	1	1	0	0	1	0.625
1379	2019	2019-05-21	12	Secondary	POST	Boy	0	1	1	1	1	1	1	1	0.875
1380	2019	2019-05-21	12	Secondary	POST	Girl	1	1	1	1	1	1	0	1	0.875
1381	2019	2019-05-21	13	Secondary	POST	Girl	1	1	1	1	1	1	0	1	0.875
1382	2019	2019-05-21	12	Secondary	POST	Girl	1	1	1	0	0	1	0	1	0.625
1383	2019	2019-05-21	13	Secondary	POST	Girl	0	1	0	1	0	1	0	1	0.5
1384	2019	2019-05-21	12	Secondary	POST	Boy	1	1	1	0	0	1	1	1	0.75
1385	2019	2019-05-21	12	Secondary	POST	Girl	1	1	1	1	1	1	1	1	1
1386	2019	2019-05-21	12	Secondary	POST	Girl	1	1	1	0	1	1	0	1	0.75
1387	2019	2019-05-30	11	Primary	POST	Girl	0	1	1	0	0	1	0	0	0.375
1388	2019	2019-05-30	11	Primary	POST	Girl	0	1	1	0	0	1	0	0	0.375
1389	2019	2019-05-30	10	Primary	POST	Girl	1	1	1	1	0	0	0	0	0.5
1390	2019	2019-05-30	10	Primary	POST	Girl	1	1	1	0	1	1	0	1	0.75
1391	2019	2019-05-30	10	Primary	POST	Boy	1	1	0	0	0	1	0	1	0.5
1392	2019	2019-05-30	10	Primary	POST	Boy	1	1	1	1	0	1	0	0	0.625
1393	2019	2019-05-30	11	Primary	POST	Boy	1	1	1	1	0	1	0	1	0.75
1394	2019	2019-05-30	11	Primary	POST	Boy	1	1	1	1	0	1	0	1	0.75
1395	2019	2019-05-30	11	Primary	POST	Boy	1	1	1	1	1	1	0	1	0.875
1396	2019	2019-05-30	11	Primary	POST	Boy	1	1	1	1	1	1	0	1	0.875
1397	2019	2019-05-30	11	Primary	POST	Girl	1	1	1	1	1	1	0	1	0.875
1398	2019	2019-05-30	11	Primary	POST	Boy	1	1	1	1	1	1	0	0	0.75
1399	2019	2019-05-30	10	Primary	POST	Boy	1	1	1	1	1	1	0	0	0.75
1400	2019	2019-05-30	12	Primary	POST	Girl	1	1		1	1	1	0	0	0.625
1401	2019	2019-05-30	10	Primary	POST	Boy	0	1	1	0	1	1	0	1	0.625
1402	2019	2019-05-30	10	Primary	POST	Girl	0	1	1	0	0	1	0	1	0.5
1403	2019	2019-05-30	11	Primary	POST	Girl	1	1	1	1	1	1	0	1	0.875
1404	2019	2019-05-30	10	Primary	POST	Girl	0	1	1	1	1	1	0	1	0.75
1405	2019	2019-05-30	10	Primary	POST	Boy	0	1	1	0	0	1	0	1	0.5
1406	2019	2019-05-30	10	Primary	POST	Girl	0	1	1	0	1	1	0	1	0.625
1407	2019	2019-05-30	11	Primary	POST	Boy	1	1	0	1	0	0	0	1	0.5
1408	2019	2019-05-30	10	Primary	POST	Girl	1	1	1	1	0	1	0	0	0.625
1409	2019	2019-05-30	11	Primary	POST	Girl	1	1	1	1	0	1	0	0	0.625
1410	2019	2019-05-30	11	Primary	POST	Girl	1	1	1	1	0	1	0	1	0.75
1411	2019	2019-05-30	10	Primary	POST	Girl	1	1	1	1	0	1	0	0	0.625
1412	2019	2019-06-07	11	Primary	POST	Girl	1	1	1	1	0	1	0	1	0.75
1413	2019	2019-06-07	10	Primary	POST	Girl	1	1	1	1	0	1	0	1	0.75
1414	2019	2019-06-07	10	Primary	POST	Girl	1	1	1	0	0	0	0	1	0.5
1415	2019	2019-06-07	11	Primary	POST	Boy	1	1	1	0	1	1	1	0	0.75
1416	2019	2019-06-07	10	Primary	POST	Girl	1	1	1	1	1	1	1	1	1
1417	2019	2019-06-07	10	Primary	POST	Boy	1	1	1	0	1	1	0	1	0.75
1418	2019	2019-06-07	11	Primary	POST	Girl	1	1	1	0	1	1	1	0	0.75
1419	2019	2019-06-07	11	Primary	POST	Girl	1	1	1	1	1	1	1	1	1
1420	2019	2019-06-07	10	Primary	POST	Boy	1	1	1	1	1	1	0	0	0.75
1421	2019	2019-06-07	10	Primary	POST	Boy	1	1	1	1	1	1	1	1	1
1422	2019	2019-06-07	11	Primary	POST	Boy	1	1	1	1	1	1	0	0	0.75
1423	2019	2019-06-07	10	Primary	POST	Boy	1	1	1	1	1	1	0	1	0.875
1424	2019	2019-06-07	11	Primary	POST	Girl	1	1	1	1	1	1	0	1	0.875
1425	2019	2019-06-07	11	Primary	POST	Girl	0	1	1	1	1	1	0	1	0.75
1426	2019	2019-06-07	10	Primary	POST	Boy	1	1	1	1	1	1	1	1	1
1427	2019	2019-06-07	11	Primary	POST	Boy	0	1	1	1	1	1	1	0	0.75
1428	2019	2019-06-07	10	Primary	POST	Boy	1	1	1	1	0	1	0	1	0.75
1429	2019	2019-06-07	11	Primary	POST	Boy	1	1	1	1	1	1	1	1	1
1430	2019	2019-06-07	11	Primary	POST	Boy	1	1	1	0	1	1	1	0	0.75
1431	2019	2019-06-07	10	Primary	POST	Girl	1	1	1	1	0	1	0	1	0.75
1432	2019	2019-06-07	10	Primary	POST	Girl	1	1	1	0	0	1	1	1	0.75
1433	2019	2019-06-12	10	Primary	POST	Girl	1	1	1	1	1	1	0	1	0.875
1434	2019	2019-06-12	10	Primary	POST	Boy	1	1	1	0	1	1	0	1	0.75
1435	2019	2019-06-12	10	Primary	POST	Boy	1	1	1	1	1	1	1	0	0.875
1436	2019	2019-06-12	9	Primary	POST	Girl	1	1	1	1	1	1	0	1	0.875
1437	2019	2019-06-12	10	Primary	POST	Boy	1	1	1	1	0	1	1	1	0.875
1438	2019	2019-06-12	10	Primary	POST	Girl	1	1	1	1	1	1	0	1	0.875
1439	2019	2019-06-12	10	Primary	POST	Boy	1	1	1	1	1	1	0	1	0.875
1440	2019	2019-06-14	13	Secondary	POST	Girl	1	1	1	1	1		0	1	0.75
1441	2019	2019-06-14	12	Secondary	POST	Girl	1	1	1	1	1	1	0	1	0.875
1442	2019	2019-06-14	13	Secondary	POST	Girl	1	1	1	1	1	1	0	1	0.875
1443	2019	2019-06-14	12	Secondary	POST	Boy	1	1	1	1	1	1	1	1	1
1444	2019	2019-06-14	12	Secondary	POST	Boy	1	1	1	0	1	1	0	1	0.75
1445	2019	2019-06-14	13	Secondary	POST	Boy	1	1	1	1	1	1	1	1	1
1446	2019	2019-06-14	13	Secondary	POST	Girl	1	1	1	1	1	1	0	1	0.875
1447	2019	2019-06-14	12	Secondary	POST	Boy	1	1	1	1	0	1	1	1	0.875
1448	2019	2019-06-14	12	Secondary	POST	Boy	1	1	1	1	1	1	0	1	0.875
1449	2019	2019-06-14	13	Secondary	POST	Boy	1	1	1	1	0	1	0	1	0.75
1450	2019	2019-06-14	13	Secondary	POST	Boy	1	1	1	1	0	1	0	0	0.625
1451	2019	2019-06-14	12	Secondary	POST	Girl	1	1	1	1	1	1	0	1	0.875
1452	2019	2019-06-14	12	Secondary	POST	Girl	1	1	1	1	1	1	0	1	0.875
1453	2019	2019-06-14	13	Secondary	POST	Girl	1	1	1	1	1	1	0	1	0.875
1454	2019	2019-06-14	12	Secondary	POST	Boy	1	1	1	1	1	1	0	1	0.875
1455	2019	2019-06-14	12	Secondary	POST	Boy	1	1	1	1		0	0	1	0.625
1456	2019	2019-06-14	13	Secondary	POST	Boy	1	1	1	0	1	1	0	1	0.75
1457	2019	2019-06-14	12	Secondary	POST	Girl	1	1	1	1	1	1	1	1	1
1458	2019	2019-06-14	13	Secondary	POST	Boy	0	1	1	1	0	1	0	1	0.625
1459	2019	2019-06-14	13	Secondary	POST	Boy	1	1	1	0	1	1	1	1	0.875
1460	2019	2019-06-14	13	Secondary	POST	Girl	1	1	1	1	1	1	1	1	1
1461	2019	2019-06-14	14	Secondary	POST	Boy	1	1	1	1	1	0		0	0.625
1462	2019	2019-06-14	12	Secondary	POST	Boy	1	1	1	1	1	1	1	1	1
1463	2019	2019-06-14	13	Secondary	POST	Boy	1	1	1	0	1	1	0	1	0.75
1464	2019	2019-06-14	13	Secondary	POST	Girl	1	1	1	1	1	1	0	1	0.875
1465	2019	2019-06-14	12	Secondary	POST	Girl	1	1	1	1	1	1	1	1	1
1466	2019	2019-06-14	13	Secondary	POST	Girl	1	1	1	1	1	1	0	1	0.875
1467	2019	2019-06-14	12	Secondary	POST	Girl	1	1	1	0	1		1	0	0.625
1468	2019	2019-06-14	13	Secondary	POST	Girl	1	1	1	1	1	0	0	1	0.75
1469	2019	2019-06-14	12	Secondary	POST	Boy	1	1	1	1	1	1	0	1	0.875
1470	2019	2019-06-14	13	Secondary	POST	Boy	1	1	1	1	1	1	1	1	1
1471	2019	2019-06-14	12	Secondary	POST	Boy	1	1		1	1	1	1	1	0.875
1472	2019	2019-06-14	13	Secondary	POST	Boy	1	1	1	1	1	1	0	1	0.875
1473	2019	2019-06-14	12	Secondary	POST	Girl	1	1	1	1	1	0	1	1	0.875
1474	2019	2019-06-14	12	Secondary	POST	Girl	1	1	1	1	1	1	0	1	0.875
1475	2019	2019-06-14	13	Secondary	POST	Girl	1	1	1	0	1	1	0	1	0.75
1476	2019	2019-06-14	13	Secondary	POST	Boy	1	1	1	0	0	1	1	0	0.625
1477	2019	2019-06-14	13	Secondary	POST	Boy	1	1	1	1	1	1	0	1	0.875
1478	2019	2019-06-14	13	Secondary	POST	Boy	1	1	1	1	0	1	1	1	0.875
1479	2019	2019-06-14	14	Secondary	POST	Boy	1	1	1	1	0	1	1	1	0.875
1480	2019	2019-06-14	13	Secondary	POST	Girl	1	1	1	1	1	0	1	1	0.875
1481	2019	2019-06-14	13	Secondary	POST	Girl	1	1	1	1	1	1	0	1	0.875
1482	2019	2019-06-14	12	Secondary	POST	Girl	1	1	1	1	1	1	1	1	1
1483	2019	2019-06-14	13	Secondary	POST	Girl	1	1	1	1	1	0	0	1	0.75
1484	2019	2019-06-14	13	Secondary	POST	Boy	1	1	1	1	1	1	1	0	0.875
1485	2019	2019-06-14	13	Secondary	POST	Girl	1	1	1	1	1	1	1	1	1
1486	2019	2019-06-14	13	Secondary	POST	Girl	1	1	1	1	1	1	0	1	0.875
1487	2019	2019-06-14	12	Secondary	POST	Girl	1	1	1	1	1	1	1	1	1
1488	2019	2019-06-14	13	Secondary	POST	Girl	1	1	1	1	1	1	0	1	0.875
1489	2019	2019-06-14	12	Secondary	POST	Boy	1	1	1	1	1	1	1	1	1
1490	2019	2019-06-14	12	Secondary	POST	Girl	1	1	1	1	1	0	1	1	0.875
1491	2019	2019-06-14	13	Secondary	POST	Girl	1	1	1	1	1	1	1	1	1
1492	2019	2019-06-14	12	Secondary	POST	Girl	1	1	1	1	1	1	0	1	0.875
1493	2019	2019-06-14	13	Secondary	POST	Boy	1	1	1	1	1	1	0	1	0.875
1494	2019	2019-06-14	13	Secondary	POST	Girl	1	1	1	1	1	1	0	1	0.875
1495	2019	2019-06-14	13	Secondary	POST	Girl	1	1	1	1	0	1	0	0	0.625
1496	2019	2019-06-14	13	Secondary	POST	Boy	1	1	1	1	1	1	0	1	0.875
1497	2019	2019-06-14	13	Secondary	POST	Boy	1	1	1	1	1	1	0	0	0.75
1498	2019	2019-06-14	12	Secondary	POST	Girl	0	1	1	1	0	1	1	1	0.75
1499	2019	2019-06-14	12	Secondary	POST	Girl	1	1	1	1	0	1	1	1	0.875
1500	2019	2019-06-14	12	Secondary	POST	Boy	1	1	1	1	1	1	0	1	0.875
1501	2019	2019-06-14	12	Secondary	POST	Boy	1	1	1		1	1	0	1	0.75
1502	2019	2019-06-14	13	Secondary	POST	Girl	1	1	1	1	0	1	0	1	0.75
1503	2019	2019-06-14	13	Secondary	POST	Girl	1	1	1		1	1	0	1	0.75
1504	2019	2019-06-14	12	Secondary	POST	Girl	1	1	1	0	1	1	0	1	0.75
1505	2019	2019-06-14	12	Secondary	POST	Girl	0	1	1	1	1	1	0	1	0.75
1506	2019	2019-06-14	13	Secondary	POST	Girl	1	1	1	1	1	1	1	1	1
1507	2019	2019-06-14	13	Secondary	POST	Girl	1	1	1	1	1	1	0	1	0.875
1508	2019	2019-06-14	13	Secondary	POST	Boy	1	1	1	1	1	1	1	1	1
1509	2019	2019-06-14	12	Secondary	POST	Boy	0	1	1	0	1	1	0	0	0.5
1510	2019	2019-06-14	12	Secondary	POST	Boy	0	1	1	1	0	1		1	0.625
1511	2019	2019-06-14	13	Secondary	POST	Girl	0	1	1	1	0	1	1	1	0.75
1512	2019	2019-06-14	14	Secondary	POST	Boy	0	1	1	1	0	1	0	1	0.625
1513	2019	2019-06-14	13	Secondary	POST	Girl	1	1	1	0	1	1	0	1	0.75
1514	2019	2019-06-14	13	Secondary	POST	Boy	0	1	1	1	0	1	0	1	0.625
1515	2019	2019-06-14	13	Secondary	POST	Girl	1	1	1	1	1	1	0	1	0.875
1516	2019	2019-06-14	12	Secondary	POST	Boy	0	1	1	1	1	1	0	1	0.75
1517	2019	2019-06-14	12	Secondary	POST	Boy	1	1	1	1	1	1	1	1	1
1518	2019	2019-06-14	12	Secondary	POST	Girl	0	1	1	1	1	1	1	1	0.875
1519	2019	2019-06-14	13	Secondary	POST	Girl	1	1	1	0	1	1	0	1	0.75
1520	2019	2019-06-14	12	Secondary	POST	Girl	0	1	1	1	0	1	0	1	0.625
1521	2019	2019-06-14	12	Secondary	POST	Boy	1	1	1	1	0	1	0	0	0.625
1522	2019	2019-06-14	12	Secondary	POST	Boy	1	0	1	1	0	1	0	1	0.625
1523	2019	2019-06-14	12	Secondary	POST	Girl		1	1	1	1	0	0	1	0.625
1524	2019	2019-06-13	14	Secondary	POST	Girl	1	1	1	1	0	1	0	1	0.75
1525	2019	2019-06-13	15	Secondary	POST	Girl	1	1	1	1	1	1	0	1	0.875
1526	2019	2019-06-13	17	Secondary	POST	Boy	1	1	1	1	1	1	0	0	0.75
1527	2019	2019-06-13	16	Secondary	POST	Boy	0	1	1	1	0	1	0	0	0.5
1528	2019	2019-06-13	15	Secondary	POST	Girl	1	1	1	1	0	1	0	1	0.75
1529	2019	2019-06-13	15	Secondary	POST	Girl	0	1	1	1	1	1	0	0	0.625
1530	2019	2019-06-13	15	Secondary	POST	Girl	1	1	1	1	1	1	0	1	0.875
1531	2019	2019-06-13	15	Secondary	POST	Girl	1	1	1	1	1	1	0	1	0.875
1532	2019	2019-06-13	15	Secondary	POST	Girl	1	1	1	0	0	1	0	1	0.625
1533	2019	2019-06-13	14	Secondary	POST	Girl	0	1	0	0	0	1	1	0	0.375
1534	2019	2019-06-13	15	Secondary	POST	Boy	1	1	1	1	0	1	0	1	0.75
1535	2019	2019-06-13	14	Secondary	POST	Boy	1	1	1	1				1	0.625
1536	2019	2019-06-13	14	Secondary	POST	Girl	1	1	1	1	0	1	0	1	0.75
1537	2019	2019-06-13	15	Secondary	POST	Girl	1	1	1	1	1	1	0	1	0.875
1538	2019	2019-06-13	14	Secondary	POST	Girl	1	1	1	1	1	1	0	1	0.875
1539	2019	2019-06-13	15	Secondary	POST	Boy	0	1	1	0	1	1			0.5
1540	2019	2019-06-13	15	Secondary	POST	Girl	1	1	1	1	0	1	0	1	0.75
1541	2019	2019-06-13	14	Secondary	POST	Girl	1	1	1	1	0	1	0	1	0.75
1542	2019	2019-06-13	15	Secondary	POST	Boy	1	1	1		1	1	0	0	0.625
1543	2019	2019-06-13	14	Secondary	POST	Boy	1	1	1	0	0	1	0	1	0.625
1544	2019	2019-06-13	14	Secondary	POST	Girl	1	1	1	1	1	1	0	1	0.875
1545	2019	2019-06-13	15	Secondary	POST	Girl	1	1	1	1	0	1	0	1	0.75
1546	2019	2019-06-13	14	Secondary	POST	Girl	1	1	1	1	0	1	0	1	0.75
1547	2019	2019-06-13	15	Secondary	POST	Boy	1	1	1	1	0	1	0	1	0.75
1548	2019	2019-06-13	15	Secondary	POST	Girl	1	1	1	1	0	1	0	1	0.75
1549	2019	2019-06-13	16	Secondary	POST	Boy	1	1	1	1	1	0	0	1	0.75
